# Supplementary material for: Mantis-shaped chiral pyridine-N-oxides: a new class of ligands in asymmetric palladium(ii)-catalysed Friedel–Crafts alkylation
Source: Royal Society of Chemistry journal article supplement (doi:10.1039/d5nj00294j), 2025-01-01

## Mantis-shaped chiral pyridine-*N*-oxides: a new class of ligands in asymmetric palladium(II)-catalysed Friedel-Crafts alkylation

Lan-Lan Yang,<sup>‡a</sup> Di-Cheng Pan,<sup>‡a</sup> Xian-Qiao Zhu,<sup>‡a</sup> De-Wu Liu,<sup>\*b</sup> Xing-Zhou Tang,<sup>b</sup> Hong-Xing Cen,<sup>a</sup>

Li-Jun Peng,<sup>\*a</sup> and Xiong-Li Liu<sup>\*a</sup>

<sup>a</sup> Key laboratory of Plant Resource Conservation and Germplasm Innovation in Mountainous Region (Ministry of Education), College of Life Sciences/Institute of Agro-bioengineering, Guizhou University, Guiyang 550025, China.

<sup>b</sup> Anorectic Surgery Department, Second Affiliated Hospital of Guizhou University of Traditional Chinese Medicine, Guiyang 550025, China.

<sup>‡</sup> These three authors contributed equally to this work.

### Table of Contents

|                                                                                                                                  |     |
|----------------------------------------------------------------------------------------------------------------------------------|-----|
| Table of contents.....                                                                                                           | S1  |
| 1. General information.....                                                                                                      | S2  |
| 2. General procedure for preparation of chiral ligands <b>L1</b> .....                                                           | S2  |
| 3. Characterization data of <b>3a</b> and ligands <b>L</b> .....                                                                 | S2  |
| 4. The gram scale synthesis of the ligand <b>L1a</b> .....                                                                       | S9  |
| 5. Catalytic asymmetric synthesis of compounds <b>6</b> .....                                                                    | S9  |
| 6. Characterization data of compounds <b>6</b> .....                                                                             | S10 |
| 7. Compared experiments using different ligands.....                                                                             | S17 |
| 8. References.....                                                                                                               | S20 |
| 9. General experimental procedures for in vitro cytotoxicity assay.....                                                          | S20 |
| 10. X-ray crystal data for compound <b>L1a</b> .....                                                                             | S21 |
| 11. The copies of <sup>1</sup> H NMR, <sup>13</sup> C NMR and HPLC spectra for compounds <b>3a</b> , <b>L</b> and <b>6</b> ..... | S22 |

## 1. General information

Reactions were monitored by thin layer chromatography using UV light to visualize the course of reaction. Purification of reaction products was carried out by flash chromatography.  $^1\text{H}$  and  $^{13}\text{C}$ NMR spectra were obtained using a Bruker DPX-400 spectrometer.  $^1\text{H}$  NMR chemical shifts are reported in ppm ( $\delta$ ) relative to tetramethylsilane (TMS) with the solvent resonance employed as the internal standard. Data are reported as follows: chemical shift, multiplicity (s = singlet, d = doublet, t = triplet, m = multiplet), coupling constants (Hz) and integration.  $^{13}\text{C}$  NMR chemical shifts are reported in ppm ( $\delta$ ) from tetramethylsilane (TMS) with the solvent resonance as the internal standard. Melting points were measured on an electrothermal digital melting point apparatus.

## 2. General procedure for preparation of chiral ligands L1

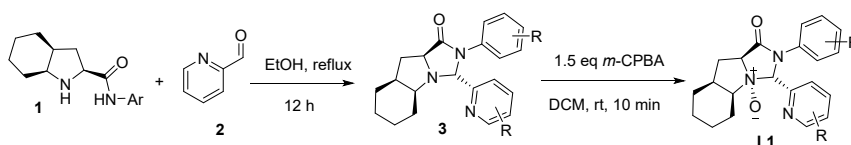

In a sealed tube equipped with a magnetic stirring bar, bicyclic prolinamides **1** (1.2 mmol, 1.2 equiv) and pyridinecarboxaldehydes **2** (1.0 mmol) were added. Then, ethanol (8.0 mL) was added and the reaction was heated with stirring at reflux for 12 h. After completion of the reaction, as indicated by TLC, the aftertreatment residue was purified by flash column chromatography to give the intermediate **3**.

In a sealed tube equipped with a magnetic stirring bar, to the intermediate **3** was added 3.0 mL of DCM and *m*-CPBA (1.5 eq). The reaction mixture was stirred at rt for 10 min. After completion of the reaction, as indicated by TLC, the aftertreatment residue was purified by flash column chromatography to furnish the pyridine-NO ligands **L1**.

## 3. Characterization data of 3a and ligands L

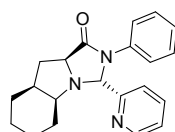

(3*R*,4*aS*,8*aS*,9*aS*)-2-phenyl-3-(pyridin-2-yl)decahydro-1*H*-imidazo[1,5-*a*]indol-1-one (**3a**): White

solid, yield 82%, >20:1 dr;  $^1\text{H}$  NMR ( $\text{CDCl}_3$ , 400 MHz)  $\delta$ : 1.06-1.29 (m, 3H), 1.36-1.40 (m, 1H), 1.55-1.65 (m, 3H), 1.96-2.00 (m, 3H), 2.31-2.36 (m, 1H), 3.25-3.30 (m, 1H), 4.21-4.25 (m, 1H), 6.08 (s, 1H), 6.97-7.01 (m, 1H), 7.14-7.19 (m, 3H), 7.29 (d,  $J = 7.6$  Hz, 1H), 7.35 (d,  $J = 8.0$  Hz, 2H), 7.62-7.66 (m, 1H), 8.41 (d,  $J = 4.4$  Hz, 1H);  $^{13}\text{C}$  NMR ( $\text{CDCl}_3$ , 100 MHz)  $\delta$ : 20.3, 22.8, 23.9, 25.4, 27.8, 38.3, 62.6, 63.5, 78.0, 121.4, 121.6, 123.5, 125.4, 128.7, 136.6, 137.5, 149.4, 158.2, 176.9; HRMS (ESI-TOF)  $m/z$ : Calcd. for  $\text{C}_{21}\text{H}_{24}\text{N}_3\text{O}$   $[\text{M}+\text{H}]^+$ : 334.1914; Found: 334.1917.

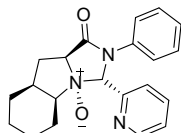

(3*S*,4*R*,4*aS*,8*aS*,9*aS*)-1-oxo-2-phenyl-3-(pyridin-2-yl)decahydroimidazo[1,5-*a*]indole 4(1*H*)-oxide (**L1a**): White solid, m.p. 198.1-198.9 °C, overall yield 62%, >20:1 dr;  $^1\text{H}$  NMR ( $\text{CDCl}_3$ , 400 MHz)  $\delta$ : 1.08-1.15 (m, 1H), 1.22-1.32 (m, 1H), 1.40-1.51 (m, 2H), 1.57-1.64 (m, 1H), 1.73-1.76 (m, 2H), 2.05-2.08 (m, 2H), 2.19-2.27 (m, 1H), 2.36-2.44 (m, 1H), 3.45-3.46 (m, 1H), 3.93-3.99 (m, 1H), 4.67-4.71 (m, 1H), 6.28 (s, 1H), 7.06-7.09 (m, 1H), 7.16-7.23 (m, 3H), 7.30 (d,  $J = 8.4$  Hz, 2H), 7.46 (d,  $J = 7.6$  Hz, 1H), 7.60-7.64 (m, 1H), 8.55 (d,  $J = 4.4$  Hz, 1H);  $^{13}\text{C}$  NMR ( $\text{CDCl}_3$ , 100 MHz)  $\delta$ : 19.1, 23.0, 23.4, 23.9, 26.7, 34.6, 75.4, 83.3, 84.0, 120.6, 123.4, 124.8, 125.4, 128.3, 134.2, 135.5, 148.8, 150.8, 168.6; HRMS (ESI-TOF)  $m/z$ : Calcd. for  $\text{C}_{21}\text{H}_{24}\text{N}_3\text{O}_2$   $[\text{M}+\text{H}]^+$ : 350.1863; Found: 350.1864.

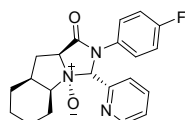

(3*S*,4*R*,4*aS*,8*aS*,9*aS*)-2-(4-fluorophenyl)-1-oxo-3-(pyridin-2-yl)decahydroimidazo[1,5-*a*]indole 4(1*H*)-oxide (**L1b**): White solid, m.p. 191.2-191.8 °C, overall yield 57%, >20:1 dr;  $^1\text{H}$  NMR ( $\text{CD}_3\text{OD}$ , 400 MHz)  $\delta$ : 1.13-1.20 (m, 1H), 1.27-1.37 (m, 2H), 1.47-1.50 (m, 1H), 1.64-1.84 (m, 3H), 2.18-1.42 (m, 3H), 3.28-3.34 (m, 1H), 3.79-3.85 (m, 1H), 4.63-4.67 (m, 1H), 6.71 (s, 1H), 6.92-6.96 (m, 2H), 7.25-7.28 (m, 1H), 7.32-7.36 (m, 2H), 7.50 (d,  $J = 7.6$  Hz, 1H), 7.69-7.73 (m, 1H), 8.54 (d,  $J = 4.4$  Hz, 1H);  $^{13}\text{C}$  NMR ( $\text{CD}_3\text{OD}$ , 100 MHz)  $\delta$ : 19.7, 23.8, 24.0, 24.5, 26.9, 35.7, 75.5, 84.2, 84.5, 115.6 (d,  $J_{\text{CF}} = 23.4$  Hz), 124.6, 126.7, 130.2, 131.1, 136.5, 149.7, 151.3, 160.8 (d,  $J_{\text{CF}} = 239.2$  Hz), 169.4; HRMS (ESI-TOF)  $m/z$ : Calcd. for  $\text{C}_{21}\text{H}_{23}\text{FN}_3\text{O}_2$   $[\text{M}+\text{H}]^+$ : 368.1763; Found: 368.1756.

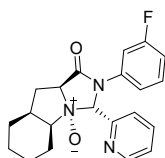

*(3S,4R,4aS,8aS,9aS)-2-(3-fluorophenyl)-1-oxo-3-(pyridin-2-yl)decahydroimidazo[1,5-a]indole*

*4(1H)-oxide (L1c)*: White solid, m.p. 206.3-206.8 °C, overall yield 57%, >20:1 dr; <sup>1</sup>H NMR (CD<sub>3</sub>OD, 400 MHz) δ: 1.21-1.29 (m, 1H), 1.37-1.47 (m, 2H), 1.56-1.59 (m, 1H), 1.74-1.91 (m, 3H), 2.30-2.38 (m, 2H), 2.45-2.53 (m, 1H), 3.38-3.42 (m, 1H), 3.90-3.96 (m, 1H), 4.73-4.77 (m, 1H), 6.88-6.93 (m, 2H), 7.23-7.33 (m, 2H), 7.36-7.39 (m, 1H), 7.44-7.48 (m, 1H), 7.68 (d, *J* = 7.6 Hz, 1H), 7.82-7.86 (m, 1H), 8.62 (d, *J* = 4.4 Hz, 1H); <sup>13</sup>C NMR (CD<sub>3</sub>OD, 100 MHz) δ: 19.8, 23.7, 23.9, 24.5, 27.1, 35.7, 75.5, 83.8, 84.3, 108.6 (d, *J*<sub>CF</sub> = 26.2 Hz), 112.7 (d, *J*<sub>CF</sub> = 21.4 Hz), 116.6, 122.3, 124.6, 126.7, 130.4 (d, *J*<sub>CF</sub> = 10.1 Hz), 136.6, 149.7, 151.2, 162.8 (d, *J*<sub>CF</sub> = 243.1 Hz), 169.3; HRMS (ESI-TOF) *m/z*: Calcd. for C<sub>21</sub>H<sub>22</sub>FN<sub>3</sub>NaO<sub>2</sub> [M+Na]<sup>+</sup>: 390.1586; Found: 390.1579.

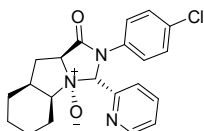

*(3S,4R,4aS,8aS,9aS)-2-(4-chlorophenyl)-1-oxo-3-(pyridin-2-yl)decahydroimidazo[1,5-a]indole*

*4(1H)-oxide (L1d)*: White solid, m.p. 197.6-197.9 °C, overall yield 60%, >20:1 dr; <sup>1</sup>H NMR (CD<sub>3</sub>OD, 400 MHz) δ: 1.23-1.29 (m, 1H), 1.39-1.46 (m, 2H), 1.57-1.60 (m, 1H), 1.77-1.91 (m, 3H), 2.29-2.37 (m, 2H), 2.44-2.52 (m, 1H), 3.37-3.42 (m, 1H), 3.90-3.95 (m, 1H), 4.72-4.76 (m, 1H), 6.86 (s, 1H), 7.29-7.31 (m, 2H), 7.37-7.40 (m, 1H), 7.46 (d, *J* = 8.4 Hz, 2H), 7.64 (d, *J* = 7.6 Hz, 1H), 7.81-7.85 (m, 1H), 8.63 (d, *J* = 4.0 Hz, 1H); <sup>13</sup>C NMR (CD<sub>3</sub>OD, 100 MHz) δ: 19.7, 23.8, 23.9, 24.5, 27.0, 35.7, 75.4, 84.1, 84.3, 123.3, 124.6, 126.7, 128.9, 131.6, 133.7, 136.6, 149.7, 151.1, 169.3; HRMS (ESI-TOF) *m/z*: Calcd. for C<sub>21</sub>H<sub>23</sub>ClN<sub>3</sub>O<sub>2</sub> [M+H]<sup>+</sup>: 384.1473; Found: 384.1466.

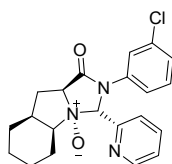

*(3S,4R,4aS,8aS,9aS)-2-(3-chlorophenyl)-1-oxo-3-(pyridin-2-yl)decahydroimidazo[1,5-a]indole*

*4(1H)-oxide (L1e)*: White solid, m.p. 190.9-191.2 °C, overall yield 60%, >20:1 dr; <sup>1</sup>H NMR

(CD<sub>3</sub>OD, 400 MHz)  $\delta$ : 1.21-1.28 (m, 1H), 1.37-1.47 (m, 2H), 1.55-1.58 (m, 1H), 1.73-1.90 (m, 3H), 2.29-2.37 (m, 2H), 2.44-2.52 (m, 1H), 3.35-3.41 (m, 1H), 3.90-3.96 (m, 1H), 4.72-4.76 (m, 1H), 6.93 (s, 1H), 7.14-7.16 (m, 1H), 7.24-7.28 (m, 1H), 7.36-7.39 (m, 2H), 7.68-7.69 (m, 2H), 7.82-7.86 (m, 1H), 8.62 (d,  $J = 4.4$  Hz, 1H); <sup>13</sup>C NMR (CD<sub>3</sub>OD, 100 MHz)  $\delta$ : 19.8, 23.8, 23.9, 24.5, 27.1, 35.7, 75.4, 83.7, 84.3, 119.4, 121.5, 124.7, 126.1, 126.8, 130.2, 134.4, 136.4, 136.6, 149.7, 151.1, 169.3; HRMS (ESI-TOF)  $m/z$ : Calcd. for C<sub>21</sub>H<sub>23</sub>ClN<sub>3</sub>O<sub>2</sub> [M+H]<sup>+</sup>: 384.1473; Found: 384.1466.

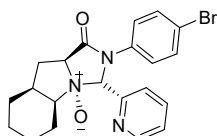

(3*S*,4*R*,4*aS*,8*aS*,9*aS*)-2-(4-bromophenyl)-1-oxo-3-(pyridin-2-yl)decahydroimidazo[1,5-*a*]indole 4(1*H*)-oxide (**L1f**): White solid, m.p. 191.3-191.7 °C, overall yield 59%, >20:1 dr; <sup>1</sup>H NMR (CD<sub>3</sub>OD, 400 MHz)  $\delta$ : 1.22-1.29 (m, 1H), 1.37-1.46 (m, 2H), 1.56-1.59 (m, 1H), 1.77-1.91 (m, 3H), 2.29-2.37 (m, 2H), 2.45-2.53 (m, 1H), 3.38-3.42 (m, 1H), 3.89-3.95 (m, 1H), 4.72-4.76 (m, 1H), 6.86 (s, 1H), 7.36-7.45 (m, 5H), 7.64 (d,  $J = 7.6$  Hz, 1H), 7.81-7.85 (m, 1H), 8.61 (d,  $J = 4.0$  Hz, 1H); <sup>13</sup>C NMR (CD<sub>3</sub>OD, 100 MHz)  $\delta$ : 19.8, 23.8, 24.0, 24.5, 27.1, 35.7, 75.5, 84.0, 84.3, 119.3, 123.5, 124.6, 126.7, 132.0, 134.3, 136.6, 149.7, 151.2, 169.3; HRMS (ESI-TOF)  $m/z$ : Calcd. for C<sub>21</sub>H<sub>23</sub>BrN<sub>3</sub>O<sub>2</sub> [M+H]<sup>+</sup>: 428.0958; Found: 428.0959.

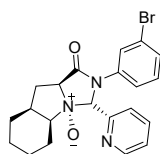

(3*S*,4*R*,4*aS*,8*aS*,9*aS*)-2-(3-bromophenyl)-1-oxo-3-(pyridin-2-yl)decahydroimidazo[1,5-*a*]indole 4(1*H*)-oxide (**L1g**): White solid, m.p. 195.9-196.3 °C, overall yield 58%, >20:1 dr; <sup>1</sup>H NMR (CD<sub>3</sub>OD, 400 MHz)  $\delta$ : 1.23-1.29 (m, 1H), 1.38-1.45 (m, 2H), 1.57-1.60 (m, 1H), 1.77-1.91 (m, 3H), 2.29-2.37 (m, 2H), 2.44-2.52 (m, 1H), 3.37-3.40 (m, 1H), 3.89-3.95 (m, 1H), 4.71-4.75 (m, 1H), 6.91 (d,  $J = 2.0$  Hz, 1H), 7.19-7.23 (m, 1H), 7.29-7.34 (m, 1H), 7.37-7.42 (m, 2H), 7.64-7.68 (m, 1H), 7.79-7.86 (m, 2H), 8.62-8.63 (m, 1H); <sup>13</sup>C NMR (CD<sub>3</sub>OD, 100 MHz)  $\delta$ : 19.7, 23.7, 23.9, 24.5, 27.1, 35.7, 75.4, 83.8, 84.3, 119.9, 122.2, 124.4, 124.7, 126.7, 129.1, 130.4, 136.4, 136.6, 149.7, 151.1, 169.4; HRMS (ESI-TOF)  $m/z$ : Calcd. for C<sub>21</sub>H<sub>23</sub>BrN<sub>3</sub>O<sub>2</sub> [M+H]<sup>+</sup>: 428.0958; Found:

428.0945.

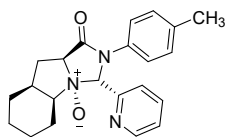

(3*S*,4*R*,4*aS*,8*aS*,9*aS*)-1-oxo-3-(pyridin-2-yl)-2-(*p*-tolyl)decahydroimidazo[1,5-*a*]indole 4(1*H*)-oxide (**L1h**): White solid, m.p. 220.6-220.9 °C, overall yield 59%, >20:1 dr; <sup>1</sup>H NMR (CD<sub>3</sub>OD, 400 MHz)  $\delta$ : 1.19-1.25 (m, 1H), 1.33-1.37 (m, 1H), 1.45-1.55 (m, 2H), 1.73-1.87 (m, 3H), 2.20 (s, 3H), 2.30-2.46 (m, 3H), 3.37-3.41 (m, 1H), 3.90-3.96 (m, 1H), 4.74-4.78 (m, 1H), 6.82 (s, 1H), 7.07 (d,  $J = 8.8$  Hz, 2H), 7.31-7.34 (m, 3H), 7.63 (d,  $J = 7.6$  Hz, 1H), 7.76-7.80 (m, 1H), 8.61 (d,  $J = 4.8$  Hz, 1H); <sup>13</sup>C NMR (CD<sub>3</sub>OD, 100 MHz)  $\delta$ : 19.7, 19.8, 23.8, 24.0, 24.6, 27.1, 35.7, 75.6, 84.2, 84.5, 122.1, 124.5, 126.7, 127.7, 129.5, 130.0, 132.5, 136.5, 136.6, 149.6, 151.6, 169.2; HRMS (ESI-TOF)  $m/z$ : Calcd. for C<sub>22</sub>H<sub>26</sub>N<sub>3</sub>O<sub>2</sub> [M+H]<sup>+</sup>: 364.2020; Found: 364.2014.

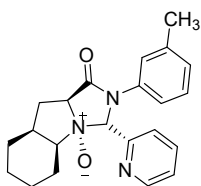

(3*S*,4*R*,4*aS*,8*aS*,9*aS*)-1-oxo-3-(pyridin-2-yl)-2-(*m*-tolyl)decahydroimidazo[1,5-*a*]indole 4(1*H*)-oxide (**L1i**): White solid, m.p. 220.1-220.4 °C, overall yield 57%, >20:1 dr; <sup>1</sup>H NMR (CD<sub>3</sub>OD, 400 MHz)  $\delta$ : 1.23-1.29 (m, 1H), 1.38-1.49 (m, 2H), 1.57-1.60 (m, 1H), 1.74-1.91 (m, 3H), 2.24 (s, 3H), 2.32-2.38 (m, 2H), 2.43-2.51 (m, 1H), 3.36-3.42 (m, 1H), 3.89-3.95 (m, 1H), 4.73-4.77 (m, 1H), 6.84 (s, 1H), 6.98 (d,  $J = 7.2$  Hz, 1H), 7.14-7.22 (m, 2H), 7.31 (s, 1H), 7.34-7.37 (m, 1H), 7.62 (d,  $J = 7.6$  Hz, 1H), 7.78-7.83 (m, 1H), 8.62-8.63 (m, 1H); <sup>13</sup>C NMR (CD<sub>3</sub>OD, 100 MHz)  $\delta$ : 20.0, 20.1, 23.8, 24.0, 24.5, 27.0, 35.7, 75.6, 84.2, 84.4, 119.0, 122.5, 124.5, 126.6, 127.1, 128.7, 134.9, 136.5, 139.1, 149.6, 151.5, 169.3; HRMS (ESI-TOF)  $m/z$ : Calcd. for C<sub>22</sub>H<sub>26</sub>N<sub>3</sub>O<sub>2</sub> [M+H]<sup>+</sup>: 364.2020; Found: 364.2014.

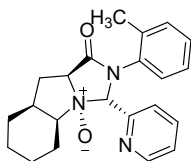

(3*S*,4*R*,4*aS*,8*aS*,9*aS*)-1-oxo-3-(pyridin-2-yl)-2-(*o*-tolyl)decahydroimidazo[1,5-*a*]indole 4(1*H*)-

oxide (**L1j**): White solid, m.p. 230.5-230.9 °C, overall yield 55%, >20:1 dr; <sup>1</sup>H NMR (CD<sub>3</sub>OD, 400 MHz) δ: 1.19-1.31 (m, 2H), 1.43-1.50 (m, 2H), 1.63-1.70 (m, 1H), 1.78-1.89 (m, 2H), 2.15 (s, 3H), 2.21-2.26 (m, 1H), 2.29-2.37 (m, 1H), 2.61-2.64 (m, 1H), 3.31-3.35 (m, 1H), 3.82-3.88 (m, 1H), 4.81-4.85 (m, 1H), 6.74 (s, 1H), 7.02-7.09 (m, 3H), 7.20-7.23 (m, 1H), 7.27-7.29 (m, 1H), 7.33 (d, *J* = 8.0 Hz, 1H), 7.57-7.61 (m, 1H), 8.56 (d, *J* = 4.4 Hz, 1H); <sup>13</sup>C NMR (CD<sub>3</sub>OD, 100 MHz) δ: 18.0, 19.6, 23.7, 24.1, 24.6, 26.2, 35.8, 75.6, 84.4, 86.4, 124.5, 125.0, 126.3, 128.2, 131.6, 132.9, 136.2, 136.5, 149.4, 151.4, 168.0; HRMS (ESI-TOF) *m/z*: Calcd. for C<sub>22</sub>H<sub>26</sub>N<sub>3</sub>O<sub>2</sub> [M+H]<sup>+</sup>: 364.2020; Found: 364.2014.

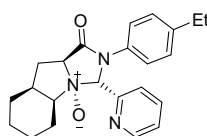

(3*S*,4*R*,4*aS*,8*aS*,9*aS*)-2-(4-ethylphenyl)-1-oxo-3-(pyridin-2-yl)decahydroimidazo[1,5-*a*]indole

4(1*H*)-oxide (**L1k**): White solid, m.p. 200.0-200.7 °C, overall yield 58%, >20:1 dr; <sup>1</sup>H NMR (CD<sub>3</sub>OD, 400 MHz) δ: 1.00-1.04 (m, 3H), 1.11-1.18 (m, 1H), 1.27-1.39 (m, 2H), 1.45-1.48 (m, 1H), 1.65-1.80 (m, 3H), 2.18-2.28 (m, 2H), 2.32-2.46 (m, 3H), 3.27-3.30 (m, 1H), 3.79-3.84 (m, 1H), 4.63-4.67 (m, 1H), 6.70 (s, 1H), 7.01 (d, *J* = 8.4 Hz, 2H), 7.22-7.26 (m, 3H), 7.51 (d, *J* = 7.6 Hz, 1H), 7.67-7.71 (m, 1H), 8.51 (d, *J* = 4.4 Hz, 1H); <sup>13</sup>C NMR (CD<sub>3</sub>OD, 100 MHz) δ: 14.6, 19.8, 23.8, 24.0, 24.6, 27.0, 27.9, 35.7, 75.6, 84.2, 84.5, 122.2, 124.5, 126.6, 128.3, 132.6, 136.5, 143.0, 149.6, 151.5, 169.3; HRMS (ESI-TOF) *m/z*: Calcd. for C<sub>23</sub>H<sub>27</sub>N<sub>3</sub>NaO<sub>2</sub> [M+Na]<sup>+</sup>: 400.1992; Found: 400.1985.

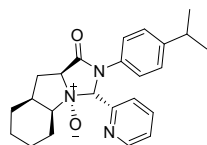

(3*S*,4*R*,4*aS*,8*aS*,9*aS*)-2-(4-isopropylphenyl)-1-oxo-3-(pyridin-2-yl)decahydroimidazo[1,5-*a*]indole

4(1*H*)-oxide (**L1l**): White solid, m.p. 210.7-211.3 °C, overall yield 60%, >20:1 dr; <sup>1</sup>H NMR (CD<sub>3</sub>OD, 400 MHz) δ: 1.14 (s, 3H), 1.15 (s, 3H), 1.21-1.28 (m, 1H), 1.36-1.49 (m, 2H), 1.55-1.59 (m, 1H), 1.56-1.91 (m, 3H), 2.32-2.38 (m, 2H), 2.43-2.51 (m, 1H), 2.77-2.84 (m, 1H), 3.38-3.42 (m, 1H), 3.89-3.95 (m, 1H), 4.77-4.78 (m, 1H), 6.81 (s, 1H), 7.15 (d, *J* = 8.4 Hz, 2H), 7.33-7.36 (m, 3H), 7.62 (d, *J* = 8.0 Hz, 1H), 7.78-7.82 (m, 1H), 8.62-8.63 (m, 1H); <sup>13</sup>C NMR (CD<sub>3</sub>OD, 100

MHz)  $\delta$ : 19.8, 22.9, 23.8, 24.0, 24.6, 27.0, 33.5, 35.7, 75.6, 84.2, 84.4, 122.1, 124.5, 126.6, 126.8, 132.7, 136.5, 147.5, 149.6, 151.6, 169.3; HRMS (ESI-TOF)  $m/z$ : Calcd. for  $C_{24}H_{29}N_3NaO_2$   $[M+Na]^+$ : 414.2147; Found: 414.2140.

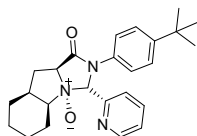

(3*S*,4*R*,4*aS*,8*aS*,9*aS*)-2-(4-(*tert*-butyl)phenyl)-1-oxo-3-(pyridin-2-yl)decahydroimidazo[1,5-*a*]indole 4(1*H*)-oxide (**L1m**): White solid, m.p. 226.6-227.2 °C, overall yield 61%, >20:1 dr;  $^1H$  NMR ( $CD_3OD$ , 400 MHz)  $\delta$ : 1.18-1.28 (m, 10H), 1.35-1.49 (m, 2H), 1.56-1.59 (m, 1H), 1.56-1.91 (m, 3H), 2.29-2.37 (m, 2H), 2.44-2.52 (m, 1H), 3.38-3.43 (m, 1H), 3.89-3.95 (m, 1H), 4.74-4.78 (m, 1H), 6.82 (s, 1H), 7.31-7.38 (m, 5H), 7.63 (d,  $J = 7.6$  Hz, 1H), 7.78-7.82 (m, 1H), 8.61 (d,  $J = 4.4$  Hz, 1H);  $^{13}C$  NMR ( $CD_3OD$ , 100 MHz)  $\delta$ : 19.8, 23.8, 24.0, 24.6, 27.0, 30.2, 34.0, 35.7, 75.6, 84.2, 84.3, 121.6, 124.5, 125.8, 126.6, 132.4, 136.5, 149.6, 149.7, 151.6, 169.3; HRMS (ESI-TOF)  $m/z$ : Calcd. for  $C_{25}H_{32}N_3O_2$   $[M+H]^+$ : 406.2486; Found: 406.2474.

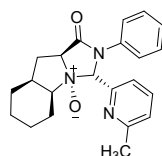

(3*S*,4*R*,4*aS*,8*aS*,9*aS*)-3-(6-methylpyridin-2-yl)-1-oxo-2-phenyldecahydroimidazo[1,5-*a*]indole 4(1*H*)-oxide (**L1n**): White solid, overall yield 56%, >20:1 dr;  $^1H$  NMR ( $CD_3OD$ , 400 MHz)  $\delta$ : 1.25-1.29 (m, 1H), 1.39-1.50 (m, 2H), 1.58-1.61 (m, 1H), 1.75-1.92 (m, 3H), 2.32-2.36 (m, 2H), 2.42-2.47 (m, 1H), 2.52 (s, 3H), 3.37-3.41 (m, 1H), 3.88-3.94 (m, 1H), 4.76-4.81 (m, 1H), 6.76 (s, 1H), 7.15-7.19 (m, 1H), 7.22 (d,  $J = 7.6$  Hz, 1H), 7.28-7.32 (m, 2H), 7.40-7.44 (m, 3H), 7.66-7.69 (m, 1H);  $^{13}C$  NMR ( $CD_3OD$ , 100 MHz)  $\delta$ : 19.8, 23.2, 23.8, 24.0, 24.5, 27.0, 35.7, 75.5, 84.2, 84.5, 122.2, 123.5, 124.0, 126.4, 128.9, 135.1, 136.7, 150.6, 159.0, 169.5; HRMS (ESI-TOF)  $m/z$ : Calcd. for  $C_{22}H_{26}N_3O_2$   $[M+H]^+$ : 364.2020; Found: 364.2017.

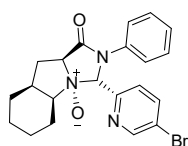

(3*S*,4*R*,4*aS*,8*aS*,9*aS*)-3-(5-bromopyridin-2-yl)-1-oxo-2-phenyldecahydroimidazo[1,5-*a*]indole



4(*1H*)-oxide (**L1o**): White solid, overall yield 58%, >20:1 dr; <sup>1</sup>H NMR (CD<sub>3</sub>OD, 400 MHz) δ: 1.09-1.17 (m, 1H), 1.24-1.47 (m, 3H), 1.62-1.79 (m, 3H), 2.17-2.25 (m, 2H), 2.33-2.41 (m, 1H), 3.26-3.30 (m, 1H), 3.78-3.84 (m, 1H), 4.58-4.62 (m, 1H), 6.80 (s, 1H), 7.04-7.07 (m, 1H), 7.17-7.21 (m, 2H), 7.33-7.35 (m, 2H), 7.47 (d, *J* = 8.4 Hz, 1H), 7.87-7.90 (m, 1H), 8.59 (d, *J* = 2.4 Hz, 1H); <sup>13</sup>C NMR (CD<sub>3</sub>OD, 100 MHz) δ: 19.8, 23.8, 24.0, 24.5, 27.1, 35.7, 75.6, 83.8, 84.3, 121.5, 122.0, 126.5, 127.9, 129.1, 134.9, 139.2, 150.4, 150.8, 169.2; HRMS (ESI-TOF) *m/z*: Calcd. for C<sub>21</sub>H<sub>23</sub>BrN<sub>3</sub>O<sub>2</sub> [M+H]<sup>+</sup>: 428.0968; Found: 428.0971.

#### 4. The gram scale synthesis of the ligand L1a

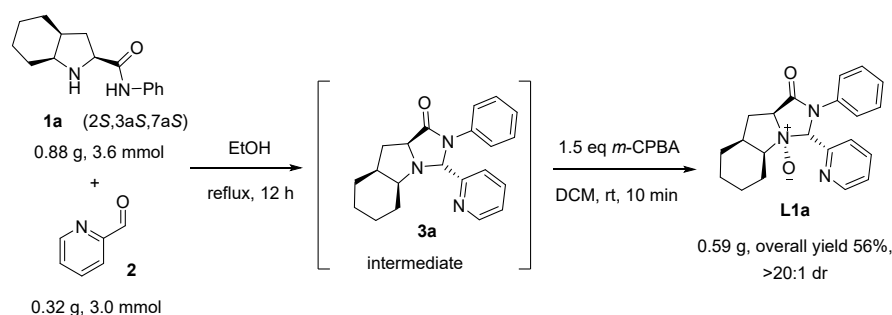

In a sealed tube equipped with a magnetic stirring bar, optically pure bicyclic prolinamide **1a** (0.88 g, 3.6 mmol) and pyridinecarboxaldehyde **2** (0.32 g, 3.0 mmol) were added. Then, ethanol (20.0 mL) was added and the reaction was heated with stirring at reflux for 12 h. After completion of the reaction, as indicated by TLC, the aftertreatment residue was purified by flash column chromatography to give the intermediate **3a**.

In a sealed tube equipped with a magnetic stirring bar, to the intermediate **3a** was added 20.0 mL of DCM and *m*-CPBA (3.0 eq). The reaction mixture was stirred at rt for 10 min. After completion of the reaction, as indicated by TLC, the aftertreatment residue was purified by flash column chromatography to furnish the pyridine-NO ligand **L1a** (0.59 g, overall yield 56%, >20:1 dr).

#### 5. Catalytic asymmetric synthesis of compounds 6

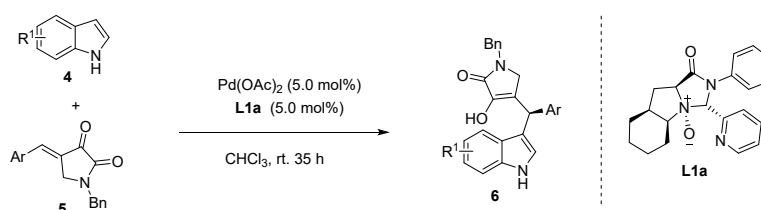

In a sealed tube equipped with a magnetic stirring bar, to the mixture of Pd(AcO)<sub>2</sub> (5.0 mol %), 5.0 mol % of **L1a** in 1.0 mL of CHCl<sub>3</sub> was added **4** (0.30 mmol), and **5** (0.20 mmol). The reaction mixture was stirred at room temperature for 35 h and was directly loaded onto a silica gel and purified by flash chromatography to give the desired product **6**, using hexane/EtOAc (10/1, v/v) as the eluent.

## 6. Characterization data of compounds **6**

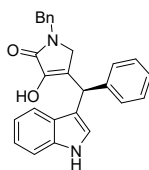

*(S)*-4-((1H-indol-3-yl)(phenyl)methyl)-1-benzyl-3-hydroxy-1,5-dihydro-2H-pyrrol-2-one (**6a**):

Product in accordance with literature characterization data<sup>8</sup>. 90%, 93% ee, [α]<sub>D</sub><sup>20</sup> = +18.3 (*c* 0.50, CHCl<sub>3</sub>). The ee was determined by HPLC analysis using a Chiralpak IA column (60/40 hexane/*i*-PrOH; flow rate: 1.0 mL/min; λ = 254 nm; τ<sub>major</sub> = 10.55 min; τ<sub>minor</sub> = 19.49 min). <sup>1</sup>H NMR (CDCl<sub>3</sub>, 400 MHz) δ: 3.54-3.67 (m, 2H), 4.51 (s, 2H), 5.58 (s, 1H), 6.85-6.89 (m, 1H), 6.95 (d, *J* = 2.0 Hz, 1H), 7.02-7.05 (m, 1H), 7.11-7.16 (m, 3H), 7.19-7.35 (m, 9H), 9.52 (br s, 1H), 10.92 (br s, 1H); <sup>13</sup>C NMR (CDCl<sub>3</sub>, 100 MHz) δ: 39.0, 45.9, 48.1, 112.0, 115.6, 118.9, 119.1, 121.6, 123.4, 123.8, 126.8, 126.9, 127.6, 127.7, 128.5, 128.8, 129.0, 136.9, 138.2, 142.5, 142.8, 167.3.

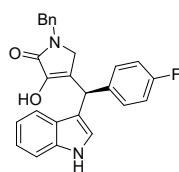

*(S)*-1-benzyl-4-((4-fluorophenyl)(1H-indol-3-yl)methyl)-3-hydroxy-1,5-dihydro-2H-pyrrol-2-one

**(6b)**: Product in accordance with literature characterization data<sup>8</sup>. 90%, 98% ee. The ee was determined by HPLC analysis using a Chiralpak IA column (60/40 hexane/*i*-PrOH; flow rate: 1.0 mL/min; λ = 254 nm; τ<sub>major</sub> = 9.03 min; τ<sub>minor</sub> = 16.33 min). <sup>1</sup>H NMR (CDCl<sub>3</sub>, 400 MHz) δ: 3.55-3.67 (m, 2H), 4.47-4.56 (m, 2H), 5.58 (s, 1H), 6.87-6.91 (m, 1H), 6.97 (d, *J* = 2.0 Hz, 1H), 7.03-7.17 (m, 6H), 7.22-7.36 (m, 6H), 9.55 (br s, 1H), 10.95 (br s, 1H); <sup>13</sup>C NMR (CDCl<sub>3</sub>, 100 MHz) δ: 38.3, 46.0, 48.2, 112.1, 115.3, 115.4 (d, *J*<sub>CF</sub> = 21.4 Hz), 119.0 (d, *J*<sub>CF</sub> = 4.4 Hz), 121.6, 123.1,

123.9, 126.7, 127.6, 127.7, 129.1, 130.2 (d,  $J_{CF} = 8.2$  Hz), 137.0, 138.1, 139.0, 142.6, 161.8 (d,  $J_{CF} = 226.3$  Hz), 167.3.

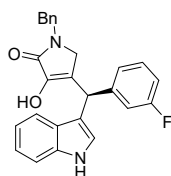

*(S)*-1-benzyl-4-((3-fluorophenyl)(1H-indol-3-yl)methyl)-3-hydroxy-1,5-dihydro-2H-pyrrol-2-one (**6c**): Product in accordance with literature characterization data<sup>8</sup>. 89%, 94% ee. The ee was determined by HPLC analysis using a Chiralpak IA column (60/40 hexane/*i*-PrOH; flow rate: 1.0 mL/min;  $\lambda = 254$  nm;  $\tau_{major} = 8.83$  min;  $\tau_{minor} = 14.93$  min). <sup>1</sup>H NMR (CDCl<sub>3</sub>, 400 MHz)  $\delta$ : 3.58-3.69 (m, 2H), 4.47-4.57 (m, 2H), 5.59 (s, 1H), 6.88-6.92 (m, 1H), 7.02-7.07 (m, 4H), 7.10-7.19 (m, 4H), 7.23 (d,  $J = 6.8$  Hz, 1H), 7.28-7.36 (m, 4H), 9.58 (br s, 1H), 10.97 (br s, 1H); <sup>13</sup>C NMR (CDCl<sub>3</sub>, 100 MHz)  $\delta$ : 38.8, 46.0, 48.2, 112.1, 113.5 (d,  $J_{CF} = 21.2$  Hz), 114.9, 115.1 (d,  $J_{CF} = 21.3$  Hz), 119.0 (d,  $J_{CF} = 8.4$  Hz), 121.7, 122.6, 124.0, 124.6, 126.7, 127.7, 127.8, 129.1, 130.6 (d,  $J_{CF} = 8.4$  Hz), 136.9, 138.1, 142.8, 145.8 (d,  $J_{CF} = 7.1$  Hz), 162.8 (d,  $J_{CF} = 241.4$  Hz), 167.2.

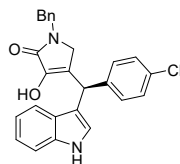

*(S)*-1-benzyl-4-((4-chlorophenyl)(1H-indol-3-yl)methyl)-3-hydroxy-1,5-dihydro-2H-pyrrol-2-one (**6d**): Product in accordance with literature characterization data<sup>8</sup>. 88%, 92% ee,  $[\alpha]_D^{20} = +67.1$  (c 0.50, CHCl<sub>3</sub>). The ee was determined by HPLC analysis using a Chiralpak IA column (60/40 hexane/*i*-PrOH; flow rate: 1.0 mL/min;  $\lambda = 254$  nm;  $\tau_{major} = 9.13$  min;  $\tau_{minor} = 16.98$  min). <sup>1</sup>H NMR (CDCl<sub>3</sub>, 400 MHz)  $\delta$ : 3.55-3.66 (m, 2H), 4.46-4.56 (m, 2H), 5.56 (s, 1H), 6.86-6.90 (m, 1H), 6.98 (d,  $J = 2.0$  Hz, 1H), 7.02-7.06 (m, 1H), 7.12-7.16 (m, 3H), 7.23-7.35 (m, 8H), 9.56 (br s, 1H), 10.96 (br s, 1H); <sup>13</sup>C NMR (CDCl<sub>3</sub>, 100 MHz)  $\delta$ : 38.5, 46.0, 48.2, 112.1, 115.1, 119.0, 121.6, 122.7, 124.0, 126.7, 127.7, 127.8, 128.7, 129.1, 130.3, 131.3, 136.9, 138.1, 141.8, 142.7, 167.3.

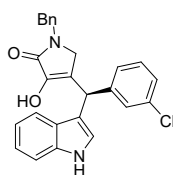

*(S)*-1-benzyl-4-((3-chlorophenyl)(1*H*-indol-3-yl)methyl)-3-hydroxy-1,5-dihydro-2*H*-pyrrol-2-one

**(6e)**: Product in accordance with literature characterization data<sup>8</sup>. 89%, 95% ee. The ee was determined by HPLC analysis using a Chiralpak IA column (60/40 hexane/*i*-PrOH; flow rate: 1.0 mL/min;  $\lambda = 254$  nm;  $\tau_{major} = 8.66$  min;  $\tau_{minor} = 16.34$  min). <sup>1</sup>H NMR (CDCl<sub>3</sub>, 400 MHz)  $\delta$ : 3.57-3.68 (m, 2H), 4.47-4.56 (m, 2H), 5.57 (s, 1H), 6.88-6.91 (m, 1H), 7.01-7.07 (m, 2H), 7.12-7.17 (m, 2H), 7.17 (d,  $J = 8.0$  Hz, 1H), 7.21-7.31 (m, 7H), 7.35 (d,  $J = 8.0$  Hz, 1H), 9.59 (br s, 1H), 10.97 (br s, 1H); <sup>13</sup>C NMR (CDCl<sub>3</sub>, 100 MHz)  $\delta$ : 38.8, 46.0, 48.3, 112.1, 114.8, 118.9, 119.1, 121.7, 122.5, 124.1, 126.7, 126.8, 127.2, 127.7, 127.8, 128.2, 129.1, 130.6, 133.4, 136.9, 138.1, 142.8, 145.5, 167.2.

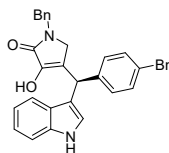

*(S)*-1-benzyl-4-((4-bromophenyl)(1*H*-indol-3-yl)methyl)-3-hydroxy-1,5-dihydro-2*H*-pyrrol-2-one

**(6f)**: Product in accordance with literature characterization data<sup>8</sup>. 91%, 99% ee,  $[\alpha]_D^{20} = +36.7$  (c 0.50, CHCl<sub>3</sub>). The ee was determined by HPLC analysis using a Chiralpak IA column (60/40 hexane/*i*-PrOH; flow rate: 1.0 mL/min;  $\lambda = 254$  nm;  $\tau_{major} = 9.15$  min;  $\tau_{minor} = 15.92$  min). <sup>1</sup>H NMR (CDCl<sub>3</sub>, 400 MHz)  $\delta$ : 3.55-3.67 (m, 2H), 4.46-4.57 (m, 2H), 5.55 (s, 1H), 6.87-6.91 (m, 1H), 6.99 (d,  $J = 2.0$  Hz, 1H), 7.03-7.06 (m, 1H), 7.12-7.16 (m, 3H), 7.19-7.24 (m, 3H), 7.27-7.31 (m, 2H), 7.34 (d,  $J = 8.4$  Hz, 1H), 7.45 (d,  $J = 8.4$  Hz, 2H), 9.57 (br s, 1H), 10.96 (br s, 1H); <sup>13</sup>C NMR (CDCl<sub>3</sub>, 100 MHz)  $\delta$ : 38.5, 46.0, 48.2, 112.1, 115.0, 119.0, 119.8, 121.7, 122.7, 124.0, 126.7, 127.7, 127.8, 129.1, 130.7, 131.6, 136.9, 138.1, 142.3, 142.8, 167.3.

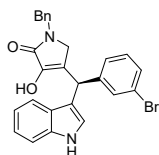

*(S)*-1-benzyl-4-((3-bromophenyl)(1*H*-indol-3-yl)methyl)-3-hydroxy-1,5-dihydro-2*H*-pyrrol-2-one

**(6g)**: Product in accordance with literature characterization data<sup>8</sup>. 91%, 97% ee. The ee was determined by HPLC analysis using a Chiralpak IA column (60/40 hexane/*i*-PrOH; flow rate: 1.0 mL/min;  $\lambda = 254$  nm;  $\tau_{major} = 8.85$  min;  $\tau_{minor} = 17.52$  min). <sup>1</sup>H NMR (CDCl<sub>3</sub>, 400 MHz)  $\delta$ : 3.57-3.68 (m, 2H), 4.48-4.57 (m, 2H), 5.57 (s, 1H), 6.88-6.92 (m, 1H), 7.02-7.08 (m, 2H), 7.12-7.19 (m,

3H), 7.23-7.32 (m, 5H), 7.35 (d,  $J = 8.4$  Hz, 1H), 7.39-7.40 (m, 2H), 9.59 (br s, 1H), 10.98 (br s, 1H);  $^{13}\text{C}$  NMR ( $\text{CDCl}_3$ , 100 MHz)  $\delta$ : 38.7, 46.0, 48.2, 112.1, 114.8, 118.9, 119.1, 121.7, 122.1, 122.5, 124.1, 126.7, 127.6, 127.7, 129.1, 129.7, 131.0, 131.1, 136.9, 138.1, 142.8, 145.7, 167.2.

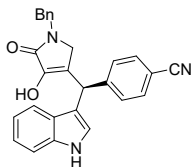

*(S)*-4-((1-benzyl-4-hydroxy-5-oxo-2,5-dihydro-1H-pyrrol-3-yl)(1H-indol-3-yl)methyl)benzonitrile (**6h**): Product in accordance with literature characterization data<sup>8</sup>. 90%, 99% ee. The ee was determined by HPLC analysis using a Chiralpak IA column (60/40 hexane/*i*-PrOH; flow rate: 1.0 mL/min;  $\lambda = 254$  nm;  $\tau_{\text{major}} = 10.74$  min;  $\tau_{\text{minor}} = 14.94$  min).  $^1\text{H}$  NMR ( $\text{CDCl}_3$ , 400 MHz)  $\delta$ : 3.58-3.68 (m, 2H), 4.46-4.58 (m, 2H), 5.64 (s, 1H), 6.88-6.91 (m, 1H), 7.03-7.07 (m, 2H), 7.12-7.17 (m, 3H), 7.21-7.25 (m, 1H), 7.28-7.32 (m, 2H), 7.35 (d,  $J = 8.0$  Hz, 1H), 7.44 (d,  $J = 8.0$  Hz, 2H), 7.34 (d,  $J = 8.0$  Hz, 2H), 9.63 (br s, 1H), 11.01 (br s, 1H);  $^{13}\text{C}$  NMR ( $\text{CDCl}_3$ , 100 MHz)  $\delta$ : 39.3, 46.0, 48.3, 109.6, 112.1, 114.4, 118.9, 119.1, 119.4, 121.7, 121.9, 124.2, 126.6, 127.7, 127.8, 129.1, 129.6, 132.8, 136.9, 138.1, 143.1, 148.7, 167.2.

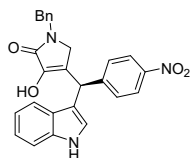

*(S)*-4-((1H-indol-3-yl)(4-nitrophenyl)methyl)-1-benzyl-3-hydroxy-1,5-dihydro-2H-pyrrol-2-one (**6i**): Product in accordance with literature characterization data<sup>8</sup>. 89%, 92% ee,  $[\alpha]_{\text{D}}^{20} = +12.2$  ( $c$  0.50,  $\text{CHCl}_3$ ). The ee was determined by HPLC analysis using a Chiralpak IA column (60/40 hexane/*i*-PrOH; flow rate: 1.0 mL/min;  $\lambda = 254$  nm;  $\tau_{\text{major}} = 11.84$  min;  $\tau_{\text{minor}} = 16.38$  min).  $^1\text{H}$  NMR ( $\text{CDCl}_3$ , 400 MHz)  $\delta$ : 3.61-3.71 (m, 2H), 4.46-4.59 (m, 2H), 5.70 (s, 1H), 6.88-6.92 (m, 1H), 7.04-7.08 (m, 2H), 7.13-7.19 (m, 3H), 7.21-7.25 (m, 1H), 7.28-7.32 (m, 2H), 7.36 (d,  $J = 8.4$  Hz, 1H), 7.52 (d,  $J = 8.8$  Hz, 2H), 9.68 (br s, 1H), 11.04 (br s, 1H);  $^{13}\text{C}$  NMR ( $\text{CDCl}_3$ , 100 MHz)  $\delta$ : 39.1, 46.0, 48.4, 112.2, 114.3, 118.9, 119.2, 121.7, 121.8, 124.0, 124.3, 126.6, 127.7, 127.8, 127.9, 128.7, 129.1, 129.8, 136.9, 138.1, 143.2, 146.5, 150.9, 167.1.

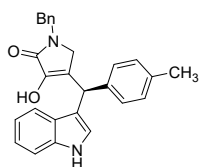

*(S)*-4-((1*H*-indol-3-yl)(*p*-tolyl)methyl)-1-benzyl-3-hydroxy-1,5-dihydro-2*H*-pyrrol-2-one (**6j**):

Product in accordance with literature characterization data<sup>8</sup>. 92%, 94% ee,  $[\alpha]_{\text{D}}^{20} = +6.7$  ( $c$  0.47,  $\text{CHCl}_3$ ). The ee was determined by HPLC analysis using a Chiralpak IA column (60/40 hexane/*i*-PrOH; flow rate: 1.0 mL/min;  $\lambda = 254$  nm;  $\tau_{\text{major}} = 9.17$  min;  $\tau_{\text{minor}} = 17.31$  min). <sup>1</sup>H NMR ( $\text{CDCl}_3$ , 400 MHz)  $\delta$ : 3.50-3.62 (m, 2H), 4.43-4.51 (m, 2H), 5.51 (s, 1H), 6.84-6.90 (m, 2H), 7.01-7.13 (m, 8H), 7.18-7.22 (m, 1H), 7.24-7.28 (m, 2H), 7.33 (d,  $J = 8.0$  Hz, 1H), 9.56 (br s, 1H), 10.83 (br s, 1H); <sup>13</sup>C NMR ( $\text{CDCl}_3$ , 100 MHz)  $\delta$ : 21.0, 38.6, 45.9, 48.1, 112.0, 115.7, 119.0, 121.7, 123.7, 124.1, 126.7, 127.7, 127.8, 128.3, 129.1, 129.4, 135.9, 136.8, 137.9, 139.5, 142.1, 167.5.

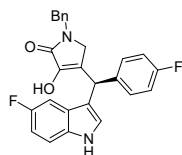

*(S)*-1-benzyl-4-((5-fluoro-1*H*-indol-3-yl)(4-fluorophenyl)methyl)-3-hydroxy-1,5-dihydro-2*H*-

*pyrrol-2-one* (**6k**): Product in accordance with literature characterization data<sup>8</sup>. 87%, 94% ee. The ee was determined by HPLC analysis using a Chiralpak IA column (60/40 hexane/*i*-PrOH; flow rate: 1.0 mL/min;  $\lambda = 254$  nm;  $\tau_{\text{major}} = 7.44$  min;  $\tau_{\text{minor}} = 11.24$  min). <sup>1</sup>H NMR ( $\text{CDCl}_3$ , 400 MHz)  $\delta$ : 3.56-3.68 (m, 2H), 4.48-4.58 (m, 2H), 5.53 (s, 1H), 6.85-6.93 (m, 2H), 7.08-7.15 (m, 5H), 7.21-7.37 (m, 6H), 9.58 (br s, 1H), 11.08 (br s, 1H); <sup>13</sup>C NMR ( $\text{CDCl}_3$ , 100 MHz)  $\delta$ : 38.3, 46.0, 48.1, 103.5 (d,  $J_{\text{CF}} = 23.2$  Hz), 109.7 (d,  $J_{\text{CF}} = 25.1$  Hz), 113.1 (d,  $J_{\text{CF}} = 9.2$  Hz), 115.5 (d,  $J_{\text{CF}} = 21.3$  Hz), 115.8 (d,  $J_{\text{CF}} = 5.2$  Hz), 122.8, 126.0, 127.7 (d,  $J_{\text{CF}} = 5.4$  Hz), 129.0, 130.2 (d,  $J_{\text{CF}} = 8.2$  Hz), 133.6, 138.1, 138.6 (d,  $J_{\text{CF}} = 3.3$  Hz), 142.7, 156.8 (d,  $J_{\text{CF}} = 230.3$  Hz), 161.6 (d,  $J_{\text{CF}} = 241.2$  Hz), 167.3.

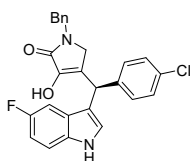

*(S)*-1-benzyl-4-((4-chlorophenyl)(5-fluoro-1*H*-indol-3-yl)methyl)-3-hydroxy-1,5-dihydro-2*H*-

*pyrrol-2-one* (**6l**): Product in accordance with literature characterization data<sup>8</sup>. 89%, 96% ee. The

ee was determined by HPLC analysis using a Chiralpak IA column (60/40 hexane/*i*-PrOH; flow rate: 1.0 mL/min;  $\lambda = 254$  nm;  $\tau_{major} = 7.61$  min;  $\tau_{minor} = 11.74$  min).  $^1\text{H}$  NMR ( $\text{CDCl}_3$ , 400 MHz)  $\delta$ : 3.58-3.69 (m, 2H), 4.48-4.59 (m, 2H), 5.54 (s, 1H), 6.88-6.94 (m, 2H), 7.11-7.15 (m, 3H), 7.23-7.39 (m, 8H), 9.63 (br s, 1H), 11.11 (br s, 1H);  $^{13}\text{C}$  NMR ( $\text{CDCl}_3$ , 100 MHz)  $\delta$ : 38.5, 46.0, 48.2, 103.6 (d,  $J_{CF} = 24.2$  Hz), 109.8 (d,  $J_{CF} = 26.1$  Hz), 113.1 (d,  $J_{CF} = 9.2$  Hz), 115.4 (d,  $J_{CF} = 5.1$  Hz), 122.4, 126.1 (d,  $J_{CF} = 9.0$  Hz), 126.9, 127.7 (d,  $J_{CF} = 4.2$  Hz), 129.0, 130.3, 131.4, 133.6, 138.1, 141.5, 142.8, 156.9 (d,  $J_{CF} = 230.3$  Hz), 167.3.

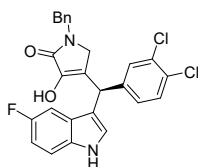

*(S)*-1-benzyl-4-((3,4-dichlorophenyl)(5-fluoro-1H-indol-3-yl)methyl)-3-hydroxy-1,5-dihydro-2H-pyrrol-2-one (**6m**): Product in accordance with literature characterization data<sup>8</sup>. 84%, 96% ee. The ee was determined by HPLC analysis using a Chiralpak IA column (60/40 hexane/*i*-PrOH; flow rate: 1.0 mL/min;  $\lambda = 254$  nm;  $\tau_{major} = 6.65$  min;  $\tau_{minor} = 9.13$  min).  $^1\text{H}$  NMR ( $\text{CDCl}_3$ , 400 MHz)  $\delta$ : 3.60-3.70 (m, 2H), 4.47-4.59 (m, 2H), 5.51 (s, 1H), 6.89-6.96 (m, 2H), 7.14-7.15 (m, 3H), 7.22-7.26 (m, 2H), 7.29-7.32 (m, 2H), 7.34-7.37 (m, 1H), 7.47 (d,  $J = 2.0$  Hz, 1H), 7.53 (d,  $J = 8.4$  Hz, 1H), 9.62 (br s, 1H), 11.13 (br s, 1H);  $^{13}\text{C}$  NMR ( $\text{CDCl}_3$ , 100 MHz)  $\delta$ : 38.3, 46.0, 48.4, 103.3, 103.7 (d,  $J_{CF} = 23.3$  Hz), 109.7 (d,  $J_{CF} = 27.0$  Hz), 113.2 (d,  $J_{CF} = 10.0$  Hz), 114.8, 121.7, 126.3, 126.9 (d,  $J_{CF} = 9.2$  Hz), 127.7, 128.9, 129.0, 129.4, 130.4, 130.9, 131.3, 133.5, 138.1, 143.0, 143.8, 157.6 (d,  $J_{CF} = 230.2$  Hz), 167.2.

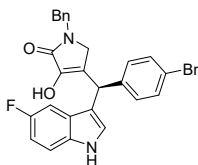

*(S)*-1-benzyl-4-((4-bromophenyl)(5-fluoro-1H-indol-3-yl)methyl)-3-hydroxy-1,5-dihydro-2H-pyrrol-2-one (**6n**): Product in accordance with literature characterization data<sup>8</sup>. 87%, 98% ee. The ee was determined by HPLC analysis using a Chiralpak IA column (60/40 hexane/*i*-PrOH; flow rate: 1.0 mL/min;  $\lambda = 254$  nm;  $\tau_{major} = 7.62$  min;  $\tau_{minor} = 11.40$  min).  $^1\text{H}$  NMR ( $\text{CDCl}_3$ , 400 MHz)  $\delta$ : 3.57-3.68 (m, 2H), 4.48-4.59 (m, 2H), 5.52 (s, 1H), 6.88-6.94 (m, 2H), 7.10-7.15 (m, 3H), 7.21-

7.25 (m, 3H), 7.28-7.32 (m, 2H), 7.35-7.38 (m, 1H), 7.47 (d,  $J = 8.4$  Hz, 2H), 9.62 (br s, 1H), 11.10 (br s, 1H);  $^{13}\text{C}$  NMR ( $\text{CDCl}_3$ , 100 MHz)  $\delta$ : 38.5, 46.0, 48.2, 103.5 (d,  $J_{\text{CF}} = 23.1$  Hz), 109.8 (d,  $J_{\text{CF}} = 26.0$  Hz), 113.2 (d,  $J_{\text{CF}} = 10.1$  Hz), 115.4 (d,  $J_{\text{CF}} = 5.3$  Hz), 119.9, 122.3, 126.1, 126.8 (d,  $J_{\text{CF}} = 10.1$  Hz), 127.7 (d,  $J_{\text{CF}} = 4.4$  Hz), 129.0, 130.7, 131.7, 133.6, 138.1, 141.9, 142.8, 156.8 (d,  $J_{\text{CF}} = 230.2$  Hz), 167.2.

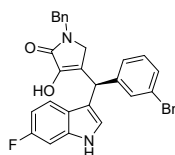

*(S)*-1-benzyl-4-((3-bromophenyl)(6-fluoro-1H-indol-3-yl)methyl)-3-hydroxy-1,5-dihydro-2H-pyrrol-2-one (**6o**): Product in accordance with literature characterization data<sup>8</sup>. 85%, 95% ee. The ee was determined by HPLC analysis using a Chiralpak IA column (60/40 hexane/*i*-PrOH; flow rate: 1.0 mL/min;  $\lambda = 254$  nm;  $\tau_{\text{major}} = 7.21$  min;  $\tau_{\text{minor}} = 12.68$  min).  $^1\text{H}$  NMR ( $\text{CDCl}_3$ , 400 MHz)  $\delta$ : 3.57-3.68 (m, 2H), 4.49-4.57 (m, 2H), 5.56 (s, 1H), 6.76-6.81 (m, 1H), 7.02 (d,  $J = 2.0$  Hz, 1H), 7.13-7.17 (m, 4H), 7.24-7.32 (m, 5H), 7.39-7.41 (m, 2H), 9.62 (br s, 1H), 11.06 (br s, 1H);  $^{13}\text{C}$  NMR ( $\text{CDCl}_3$ , 100 MHz)  $\delta$ : 38.7, 46.0, 48.2, 98.0 (d,  $J_{\text{CF}} = 25.0$  Hz), 107.6 (d,  $J_{\text{CF}} = 25.1$  Hz), 115.1, 119.9 (d,  $J_{\text{CF}} = 11.0$  Hz), 122.2 (d,  $J_{\text{CF}} = 7.3$  Hz), 123.5, 124.7, 127.6, 127.7, 129.1, 129.8, 131.0 (d,  $J_{\text{CF}} = 6.2$  Hz), 136.7 (d,  $J_{\text{CF}} = 13.2$  Hz), 138.1, 142.9, 145.5, 159.6 (d,  $J_{\text{CF}} = 233.0$  Hz), 167.2.

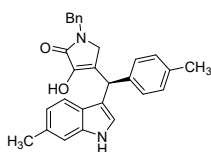

*(S)*-1-benzyl-3-hydroxy-4-((6-methyl-1H-indol-3-yl)(*p*-tolyl)methyl)-1,5-dihydro-2H-pyrrol-2-one (**6p**): Product in accordance with literature characterization data<sup>8</sup>. 88%, 94% ee. The ee was determined by HPLC analysis using a Chiralpak IC column (60/40 hexane/*i*-PrOH; flow rate: 1.0 mL/min;  $\lambda = 254$  nm;  $\tau_{\text{major}} = 6.79$  min;  $\tau_{\text{minor}} = 9.65$  min).  $^1\text{H}$  NMR ( $\text{CDCl}_3$ , 400 MHz)  $\delta$ : 2.24 (s, 3H), 2.34 (s, 3H), 3.51-3.65 (m, 2H), 4.51 (s, 2H), 5.52 (s, 1H), 6.70 (d,  $J = 8.0$  Hz, 1H), 6.85 (d,  $J = 1.6$  Hz, 1H), 7.00-7.13 (m, 8H), 7.23-7.31 (m, 3H), 9.48 (br s, 1H), 10.74 (br s, 1H);  $^{13}\text{C}$  NMR ( $\text{CDCl}_3$ , 100 MHz)  $\delta$ : 21.1, 21.8, 38.7, 45.9, 48.1, 111.8, 115.5, 118.9, 120.7, 123.1, 123.8, 124.8, 127.6, 127.7, 128.3, 129.1, 129.3, 130.6, 135.7, 137.4, 138.2, 139.8, 142.3, 167.4.



## 7. Compared experiments using different ligands

In a sealed tube equipped with a magnetic stirring bar, to the mixture of Pd(OAc)<sub>2</sub> (5.0 mol %), 5.0 mol % of **L** in 1.0 mL of CHCl<sub>3</sub> was added **4a** (0.30 mmol), and **5a** (0.20 mmol). The reaction mixture was stirred at room temperature for 35 h and was directly loaded onto a silica gel and purified by flash chromatography to give the desired product **6a**, using hexane/EtOAc (10/1, v/v) as the eluent.

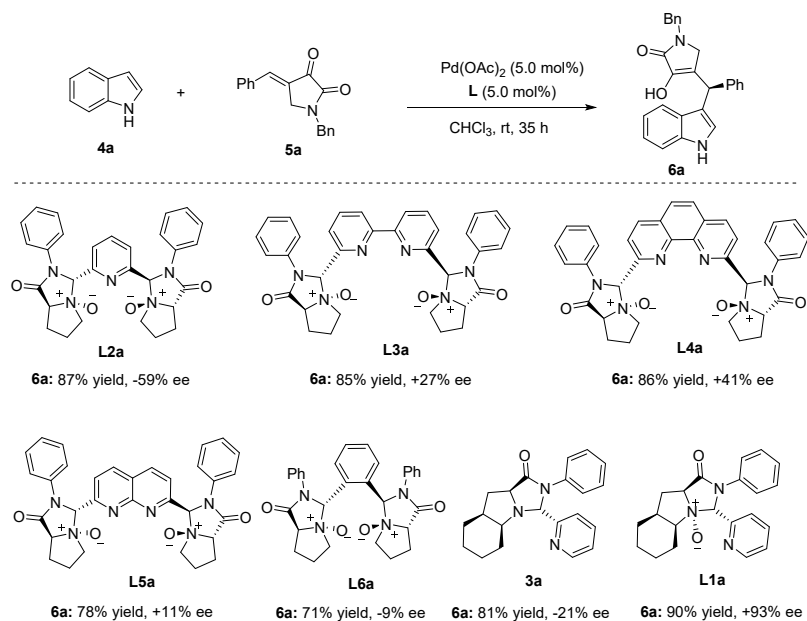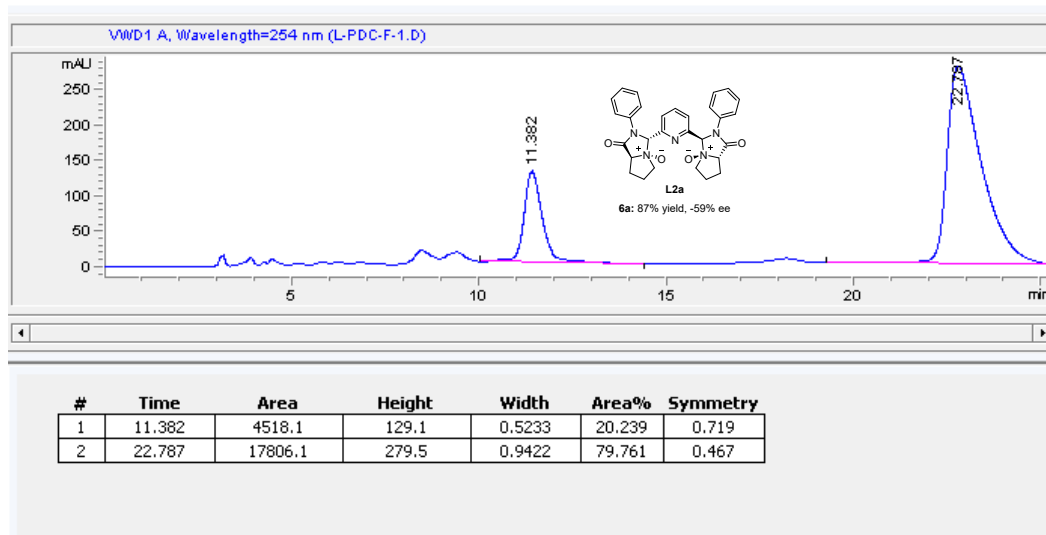

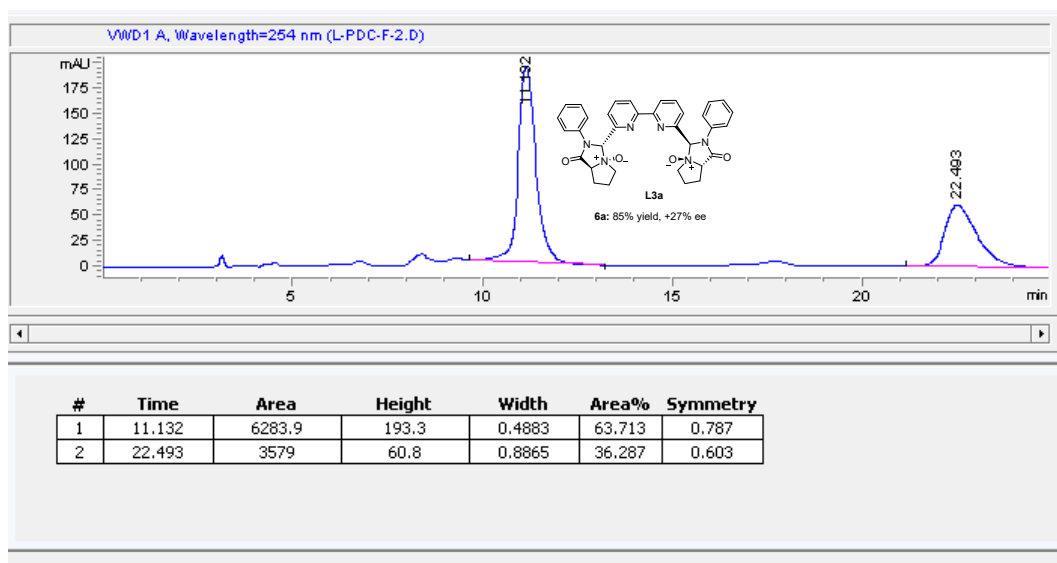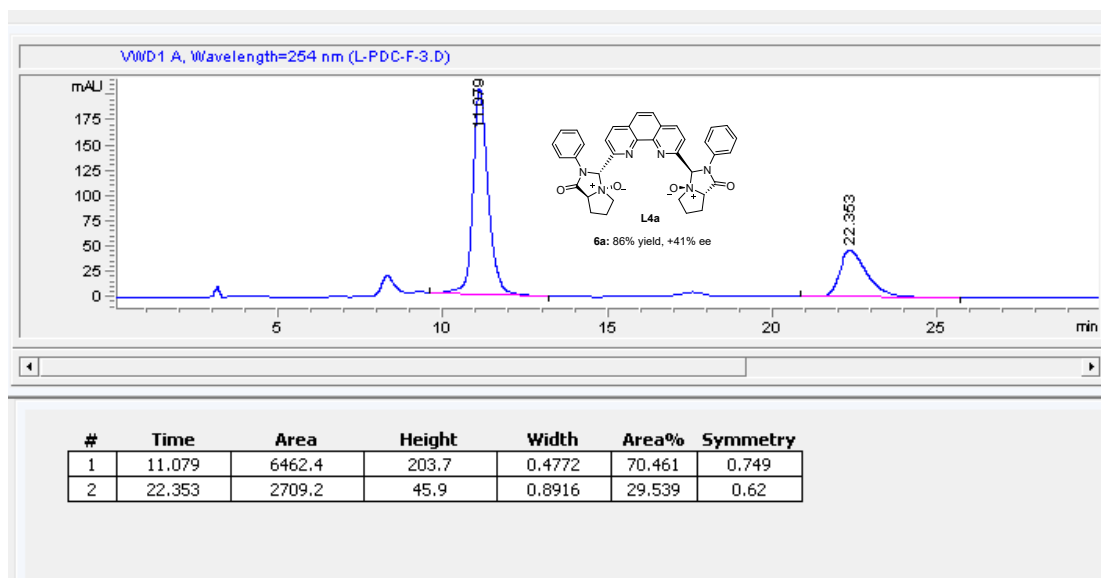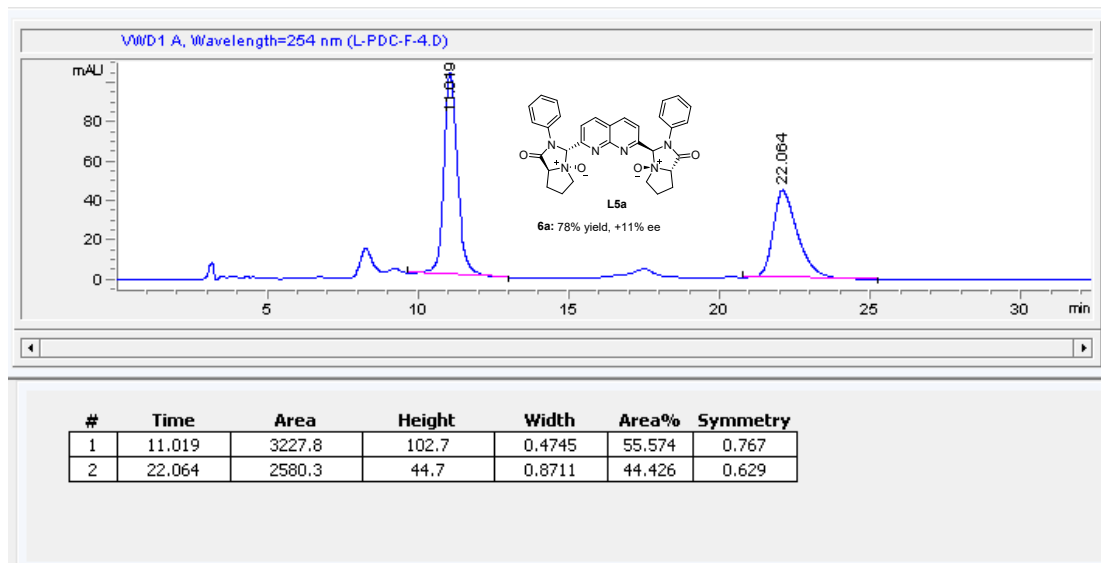

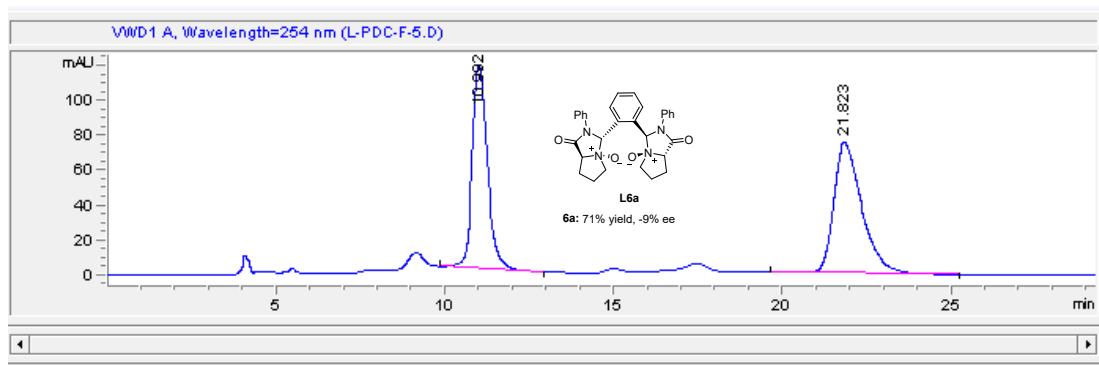

| # | Time   | Area   | Height | Width  | Area%  | Symmetry |
|---|--------|--------|--------|--------|--------|----------|
| 1 | 10.992 | 3611.7 | 116.8  | 0.4688 | 45.364 | 0.759    |
| 2 | 21.823 | 4349.8 | 75     | 0.8725 | 54.636 | 0.593    |

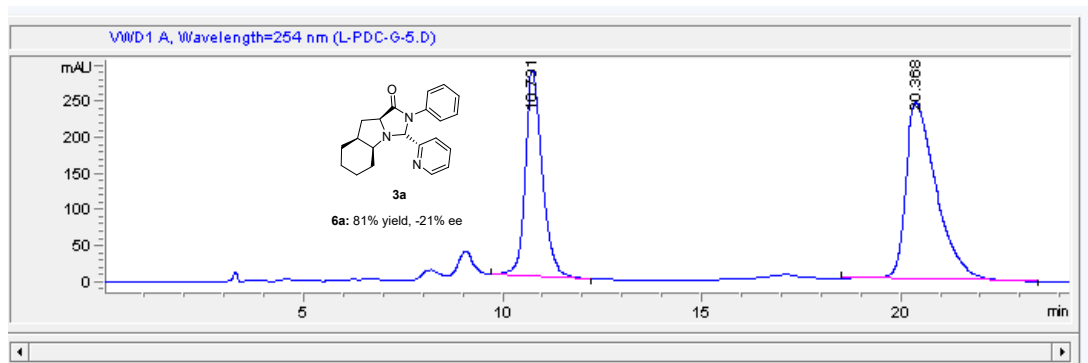

| # | Time   | Area    | Height | Width  | Area%  | Symmetry |
|---|--------|---------|--------|--------|--------|----------|
| 1 | 10.731 | 8579.9  | 285.9  | 0.4571 | 39.373 | 0.751    |
| 2 | 20.368 | 13211.6 | 245.3  | 0.7984 | 60.627 | 0.5      |

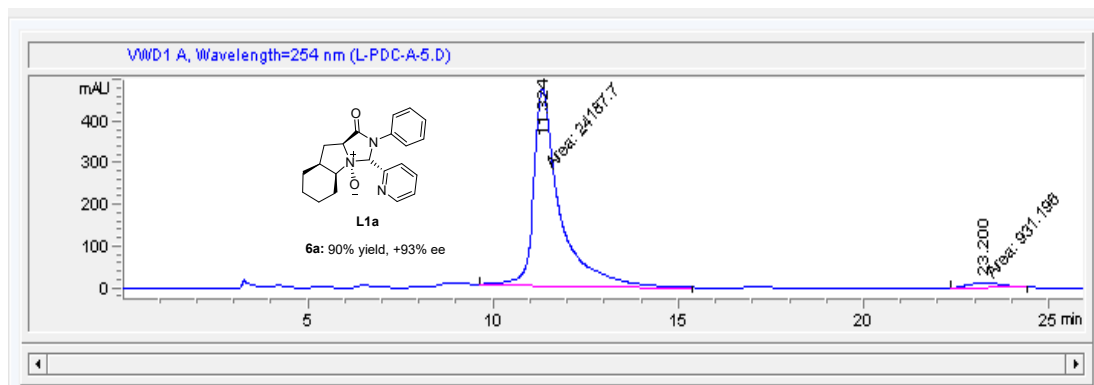

| # | Time   | Area    | Height | Width  | Area%  | Symmetry |
|---|--------|---------|--------|--------|--------|----------|
| 1 | 11.324 | 24187.7 | 474.3  | 0.85   | 96.293 | 0.52     |
| 2 | 23.2   | 931.2   | 13.4   | 1.1579 | 3.707  | 0.789    |

## 8. References

(a) J. K. Mansaray, Y. Huang, K. Li, X. Sun, Z. Zha and Z. *Org. Biomol. Chem.*, 2022, **20**, 5510-5514; (b) R. M. Liu, Y. H. Wang, Z. Y. Chen, L. Zhang, Q. H. Shi, Y. Zhou, Y. P. Tian and X. L. Liu, *Org. Chem. Front.*, 2022, **9**, 6881-6887; (c) K.-L. Xu, Y.-H. Wang, X.-R. Wang, P. Hu, B.-W. Pan, W.-J. Zhang, Z.-Y. Chen, Y. Zhou and X.-L. Liu, *Chin. J. Chem.*, 2024, **42**, 1474-1480; (d) X. Q. Zhu, W. W. Li, L. L. Liu, K. L. Xu, L. J. Peng, M. Zhang, X. L. Liu, and W. J. Zhang, *Adv. Synth. Catal.*, 2024, DOI: 10.1002adsc.202401348.

## 9. General experimental procedures for in vitro cytotoxicity assay

The human cancer cell line K562 was purchased from Chinese Academy of Sciences. All the cells were cultured in RPMI-1640 medium (GIBICO, USA), supplemented with 10% fetal bovine serum (Hyclone, USA) and Penicillin-Streptomycin ( respectively 100 U/mL) in 5% CO<sub>2</sub> at 37°C. The cytotoxicity assay was performed according to the MTT (3-(4,5-dimethylthiazol-2-yl)-2, 5-diphenyl tetrazolium bromide) method in 96-well microplates. Briefly, 5000 cells were seeded into each well of 96-well cell culture plates and allowed to grow for 24 h before drug addition. The K562 tumor cell line was exposed to test compounds **6g**, **6l** and **6m** at the concentrations of 10, 20, 40, 80, and 100 μmol·L<sup>-1</sup> in triplicates for 48 h, comparable to cisplatin (Aladdin, China). Then the MTT reagent was added to reaction with the cancer cells for 4 hours. At least, measure the OD value at 490 wavelengths. IC<sub>50</sub> of all the compounds were calculated by IBM SPSS Statistics (version 19).

## 10. X-ray crystal data for compound L1a

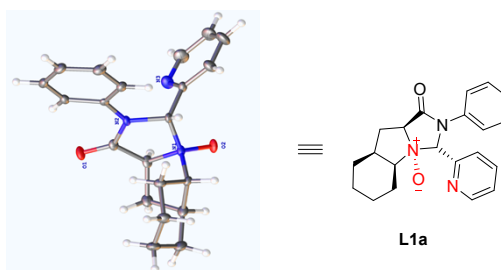

CCDC 2412333

**Table S1 Crystal data and structure refinement for L1a**

|                     |                                                               |
|---------------------|---------------------------------------------------------------|
| Identification code | <b>L1a</b>                                                    |
| Empirical formula   | C <sub>21</sub> H <sub>25</sub> N <sub>3</sub> O <sub>3</sub> |
| Formula weight      | 367.44                                                        |

|                                             |                                                               |
|---------------------------------------------|---------------------------------------------------------------|
| Temperature/K                               | 150.00                                                        |
| Crystal system                              | orthorhombic                                                  |
| Space group                                 | P2 <sub>1</sub> 2 <sub>1</sub> 2 <sub>1</sub>                 |
| a/Å, b/Å, c/Å                               | 7.1170(3), 16.0841(7), 16.6316(7)                             |
| α/°, β/°, γ/°                               | 90, 90, 90                                                    |
| Volume/Å <sup>3</sup>                       | 1903.83(14)                                                   |
| Z                                           | 4                                                             |
| ρ <sub>calc</sub> /cm <sup>3</sup>          | 1.282                                                         |
| μ/mm <sup>-1</sup>                          | 0.701                                                         |
| F(000)                                      | 784.0                                                         |
| Radiation                                   | CuKα (λ = 1.54178)                                            |
| Crystal size/mm <sup>3</sup>                | 0.16 × 0.13 × 0.09                                            |
| 2θ range for data collection/°              | 7.646 to 137.416                                              |
| Index ranges                                | -8 ≤ h ≤ 7, -19 ≤ k ≤ 19, -20 ≤ l ≤ 20                        |
| Reflections collected                       | 39237                                                         |
| Independent reflections                     | 3504 [R <sub>int</sub> = 0.0874, R <sub>sigma</sub> = 0.0370] |
| Data/restraints/parameters                  | 3504/0/247                                                    |
| Goodness-of-fit on F <sup>2</sup>           | 1.151                                                         |
| Final R indexes [I >= 2σ (I)]               | R <sub>1</sub> = 0.0477, wR <sub>2</sub> = 0.1211             |
| Final R indexes [all data]                  | R <sub>1</sub> = 0.0510, wR <sub>2</sub> = 0.1232             |
| Largest diff. peak/hole / e Å <sup>-3</sup> | 0.23/-0.22                                                    |
| Flack parameter                             | 0.05(9)/0.07(10)                                              |

**Crystal Data** for C<sub>21</sub>H<sub>25</sub>N<sub>3</sub>O<sub>3</sub> (*M* = 367.44 g/mol): orthorhombic, space group P2<sub>1</sub>2<sub>1</sub>2<sub>1</sub> (no. 19), *a* = 7.1170(3) Å, *b* = 16.0841(7) Å, *c* = 16.6316(7) Å, *V* = 1903.83(14) Å<sup>3</sup>, *Z* = 4, *T* = 150.00 K, μ(CuKα) = 0.701 mm<sup>-1</sup>, *D*<sub>calc</sub> = 1.282 g/cm<sup>3</sup>, 39237 reflections measured (7.646° ≤ 2θ ≤ 137.416°), 3504 unique (*R*<sub>int</sub> = 0.0874, *R*<sub>sigma</sub> = 0.0370) which were used in all calculations. The final *R*<sub>1</sub> was 0.0477 (*I* > 2σ(*I*)) and *wR*<sub>2</sub> was 0.1232 (all data).

## 11. The copies of <sup>1</sup>H NMR, <sup>13</sup>C NMR and HPLC spectra for compounds 3a, L and 6

### <sup>1</sup>H and <sup>13</sup>C NMR of 3a

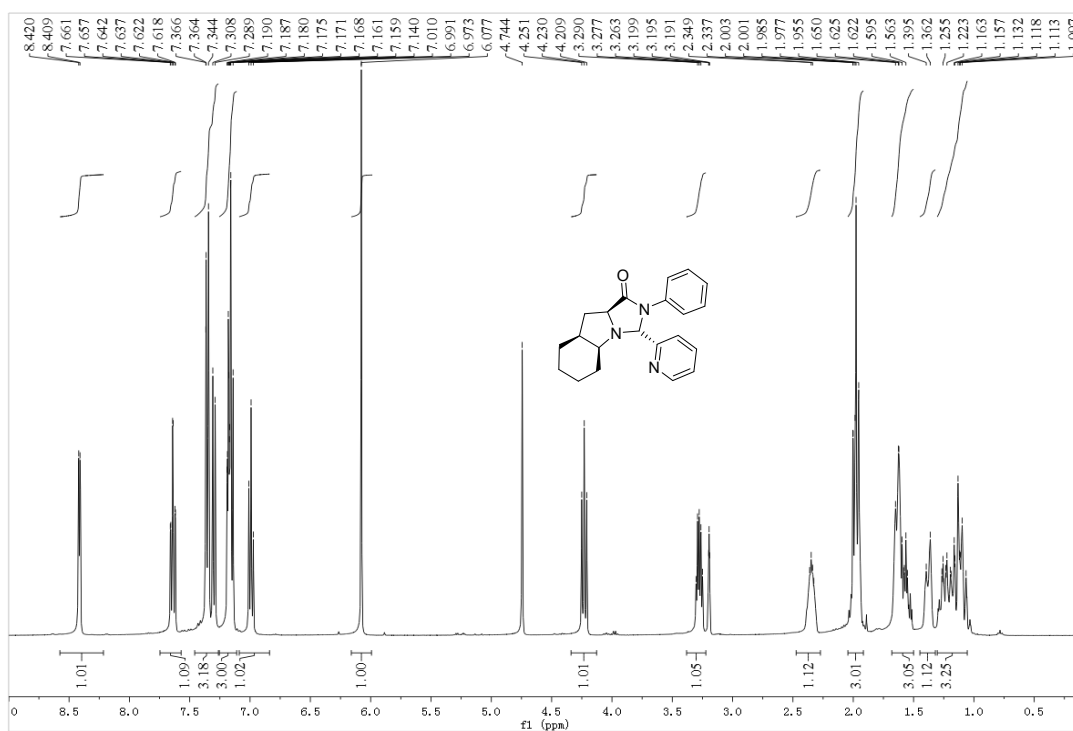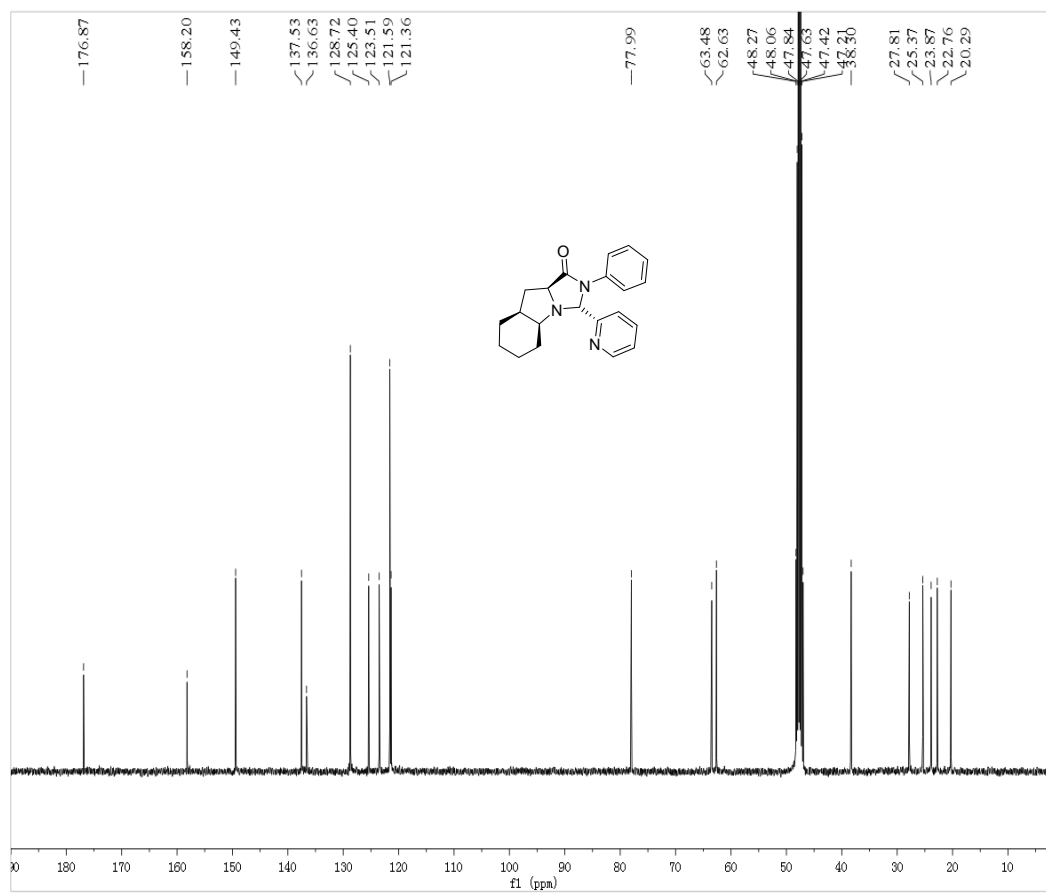

**<sup>1</sup>H and <sup>13</sup>C NMR of L1a**

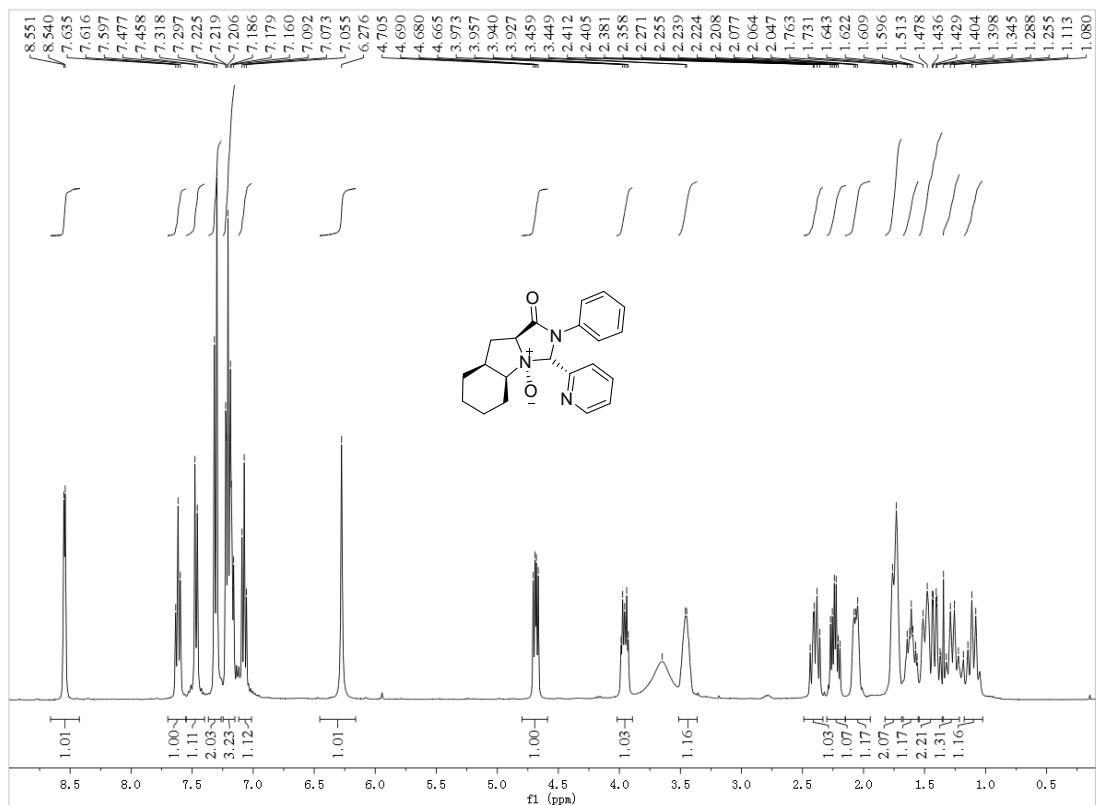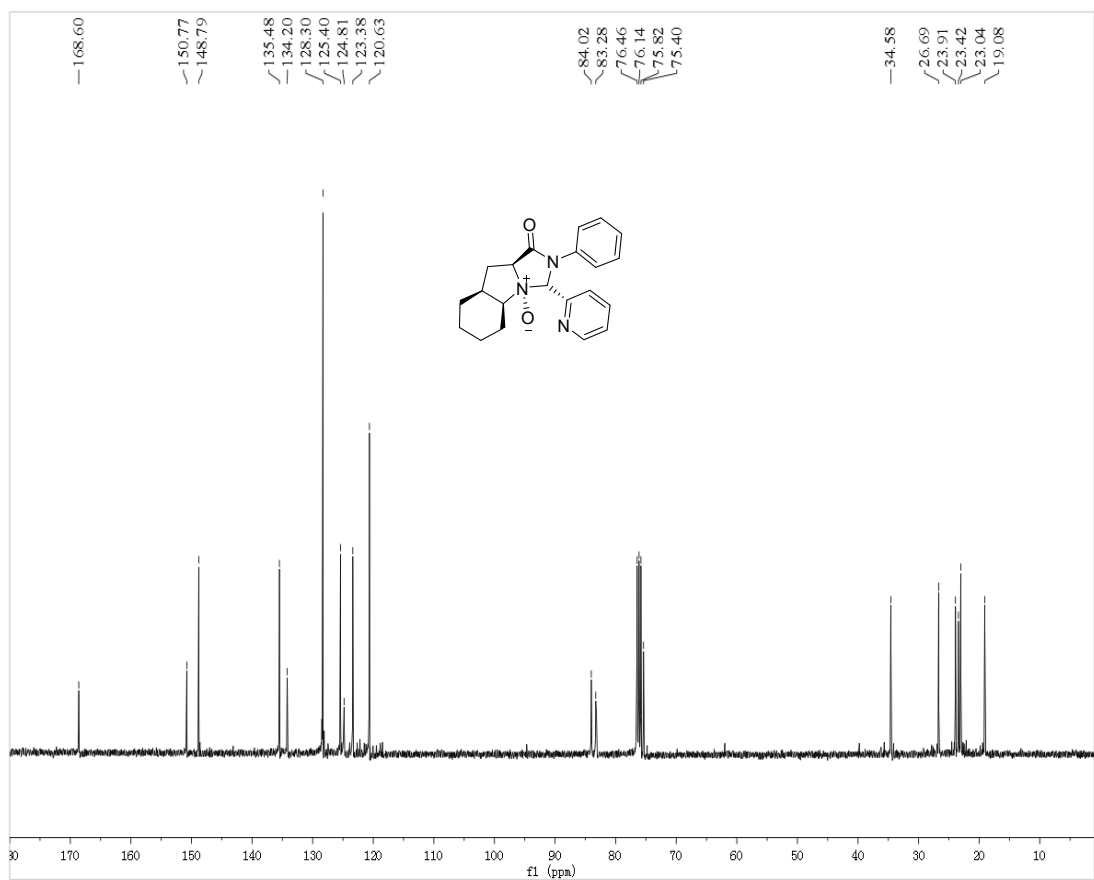

<sup>1</sup>H and <sup>13</sup>C NMR of L1b

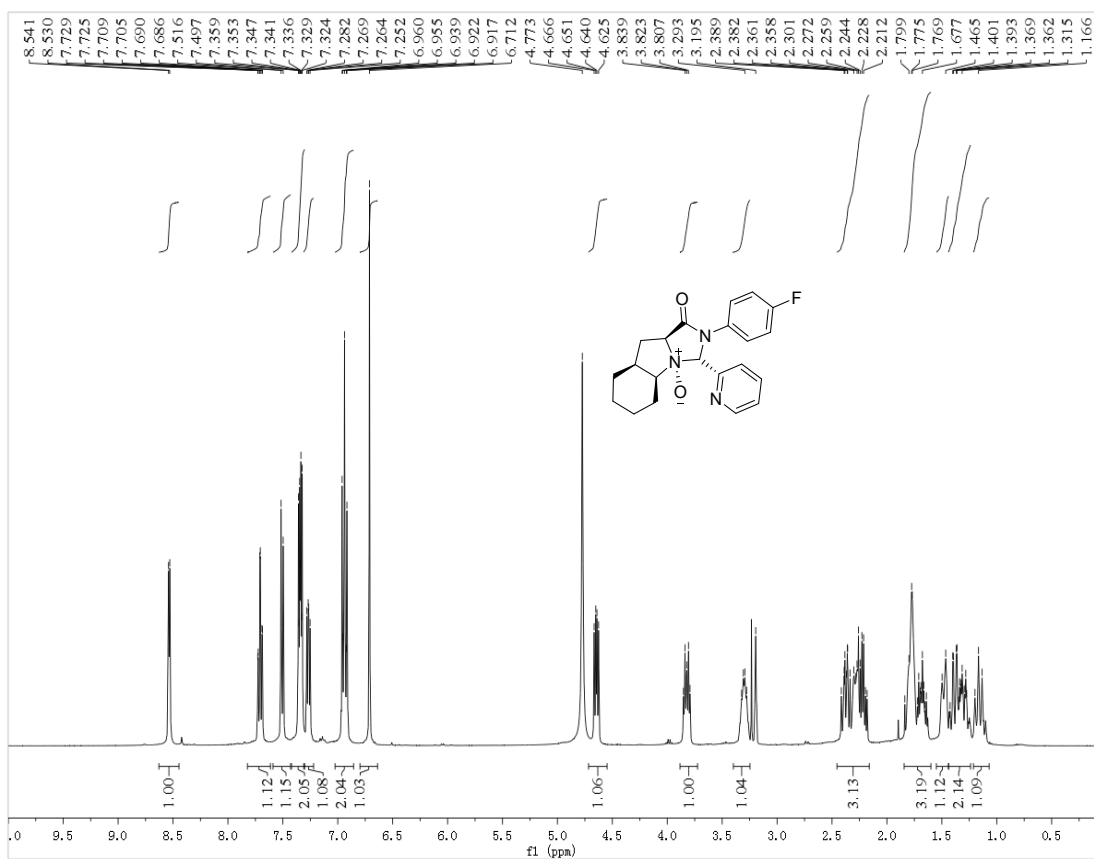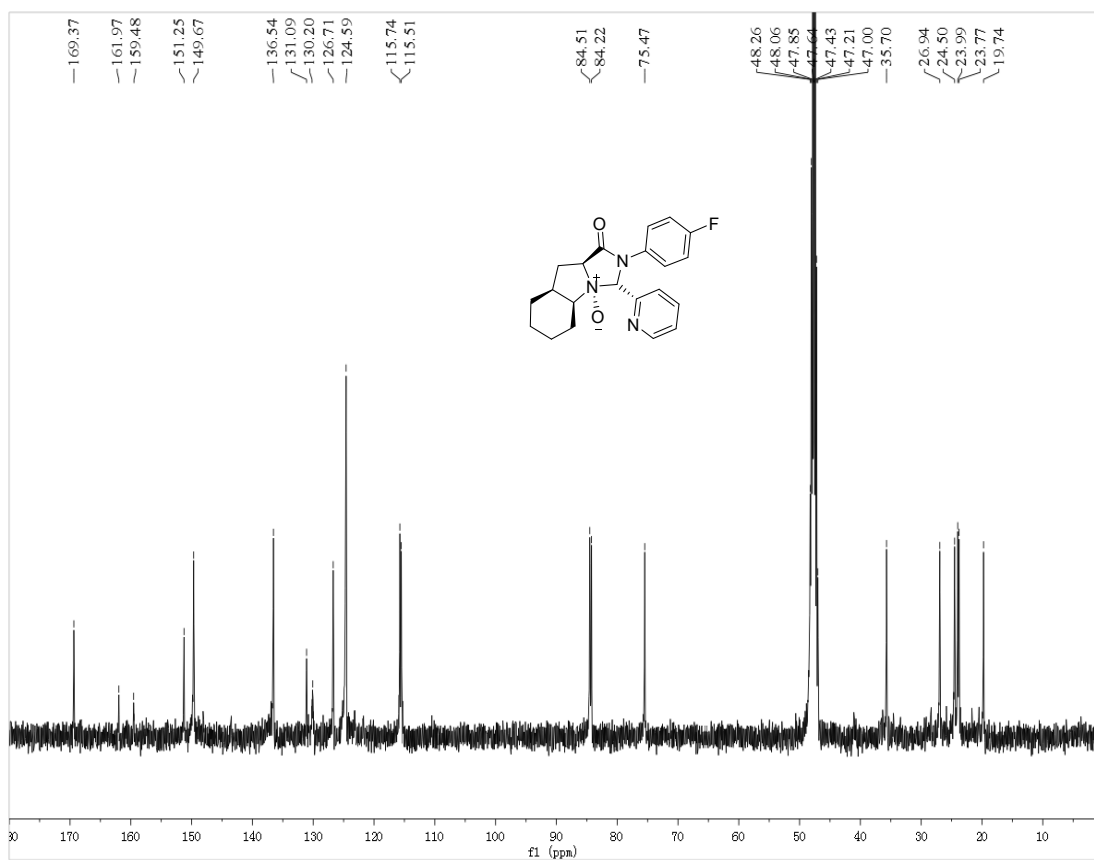

**<sup>1</sup>H and <sup>13</sup>C NMR of L1c**



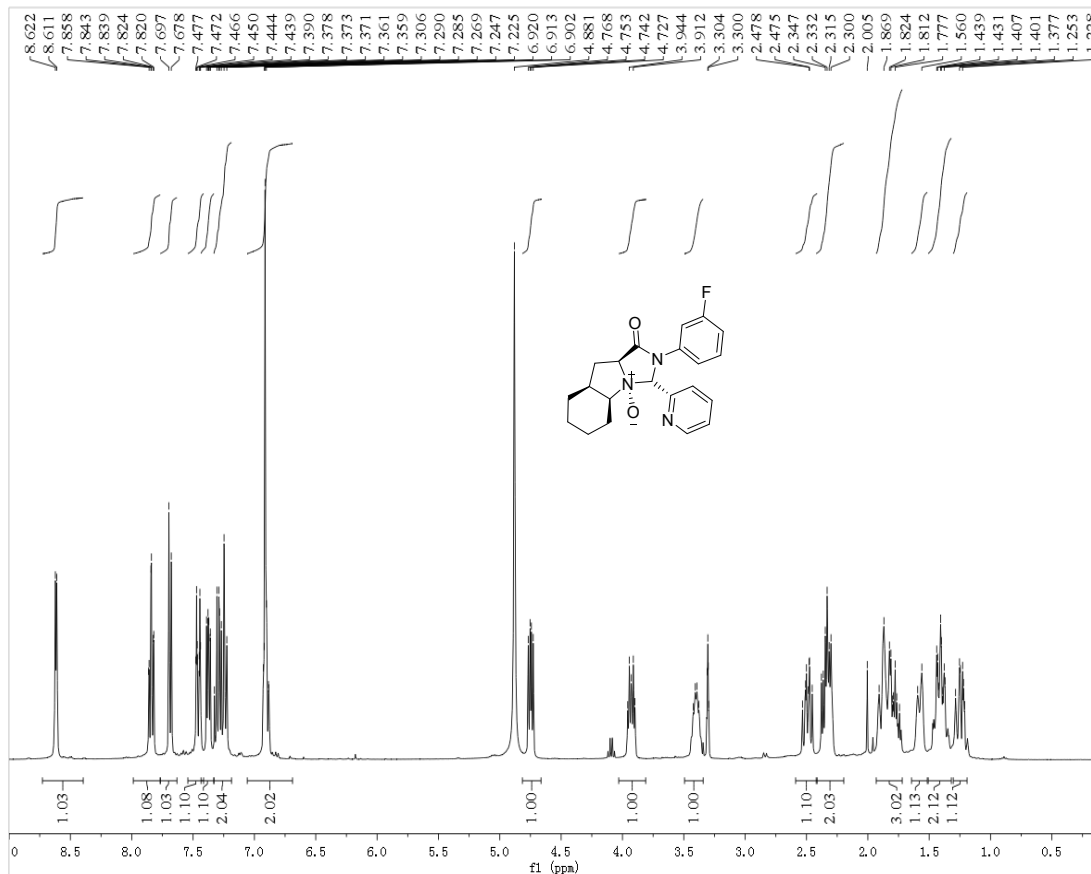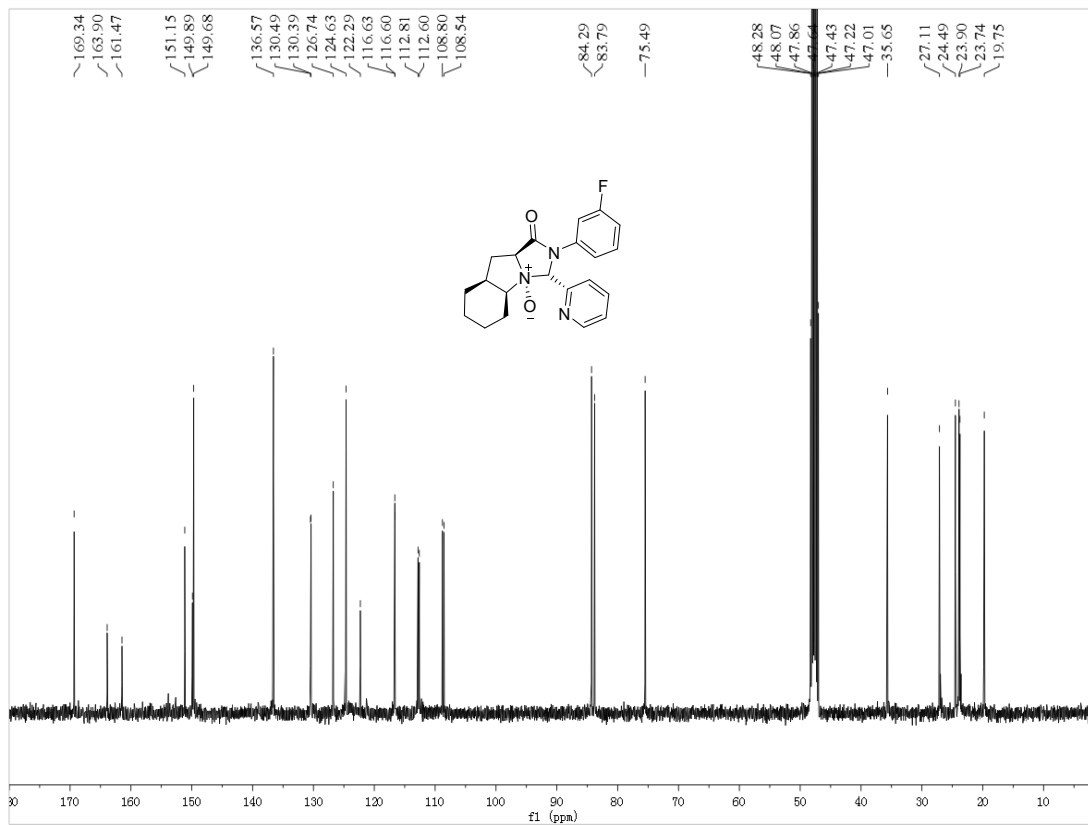

**<sup>1</sup>H and <sup>13</sup>C NMR of L1d**

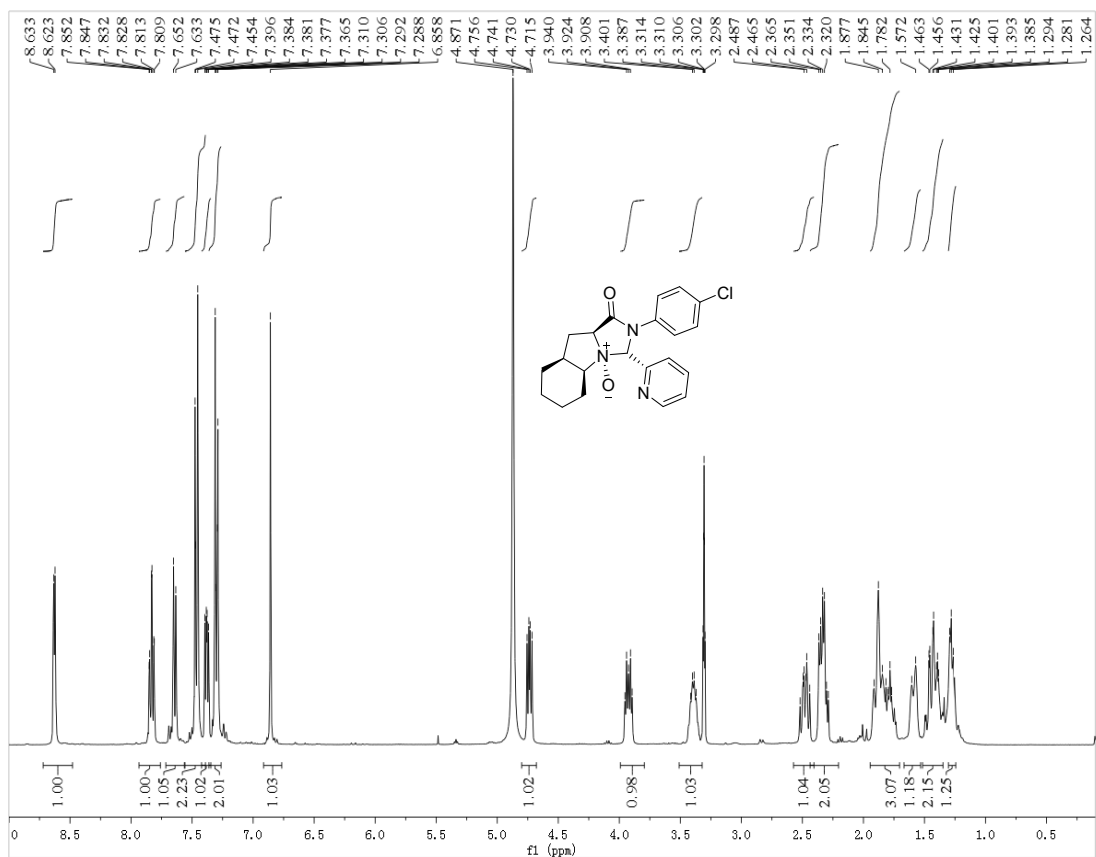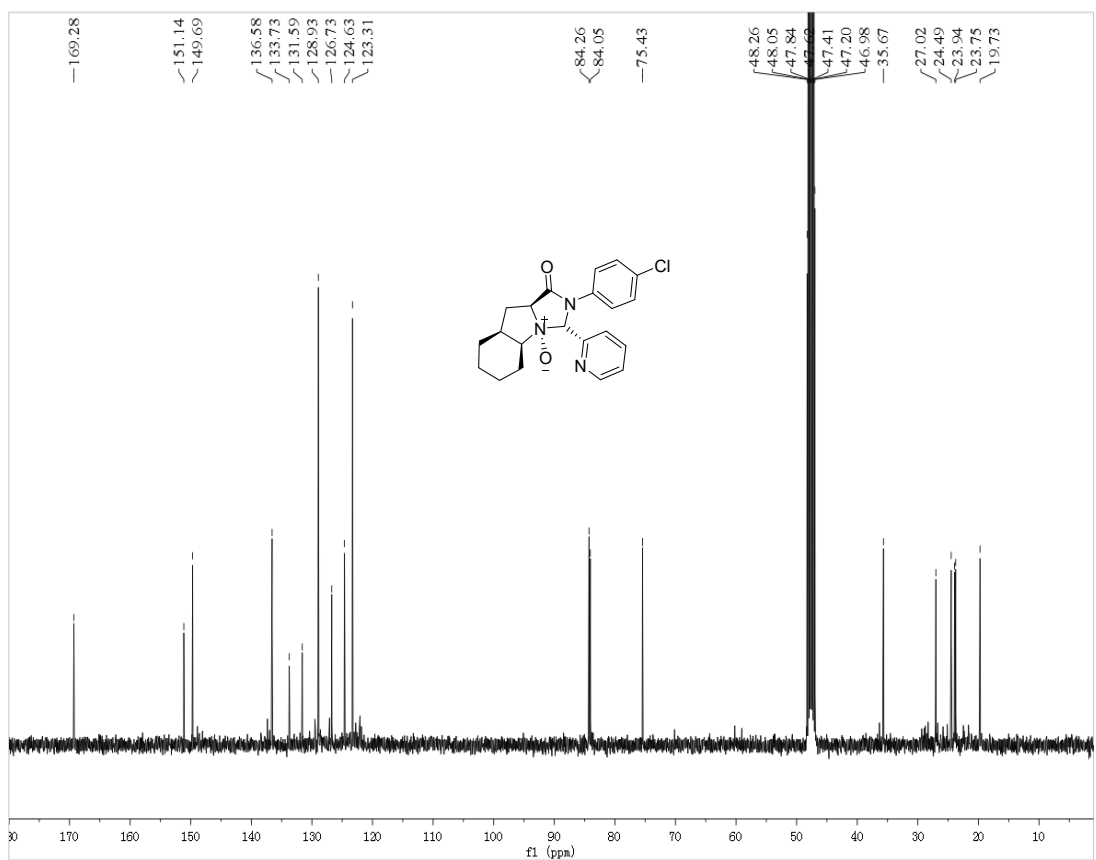

**<sup>1</sup>H and <sup>13</sup>C NMR of L1e**

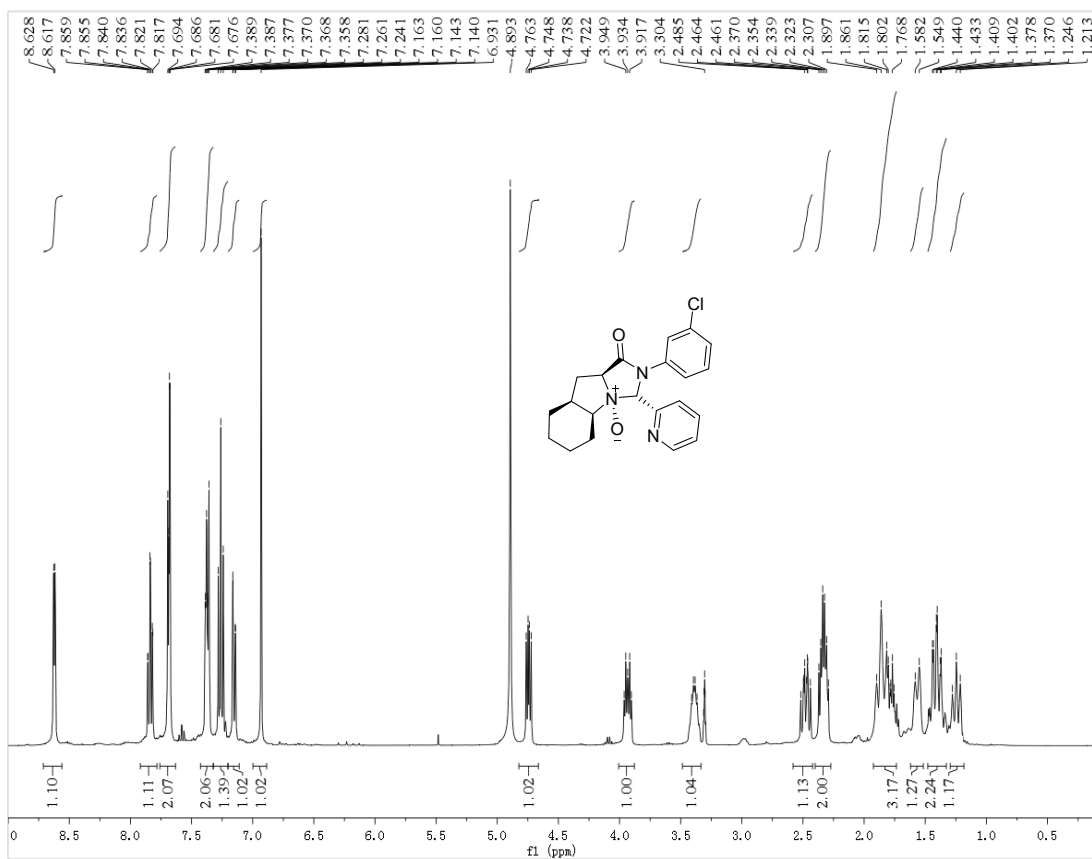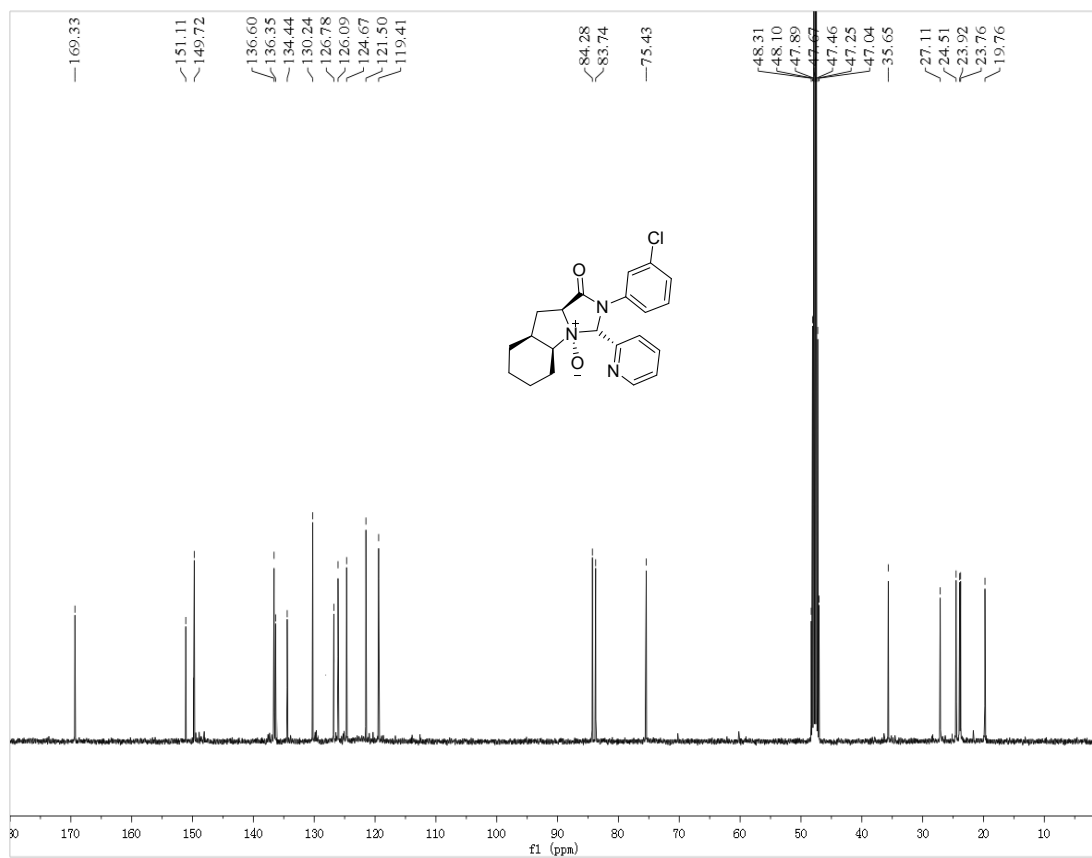

**<sup>1</sup>H and <sup>13</sup>C NMR of L1f**

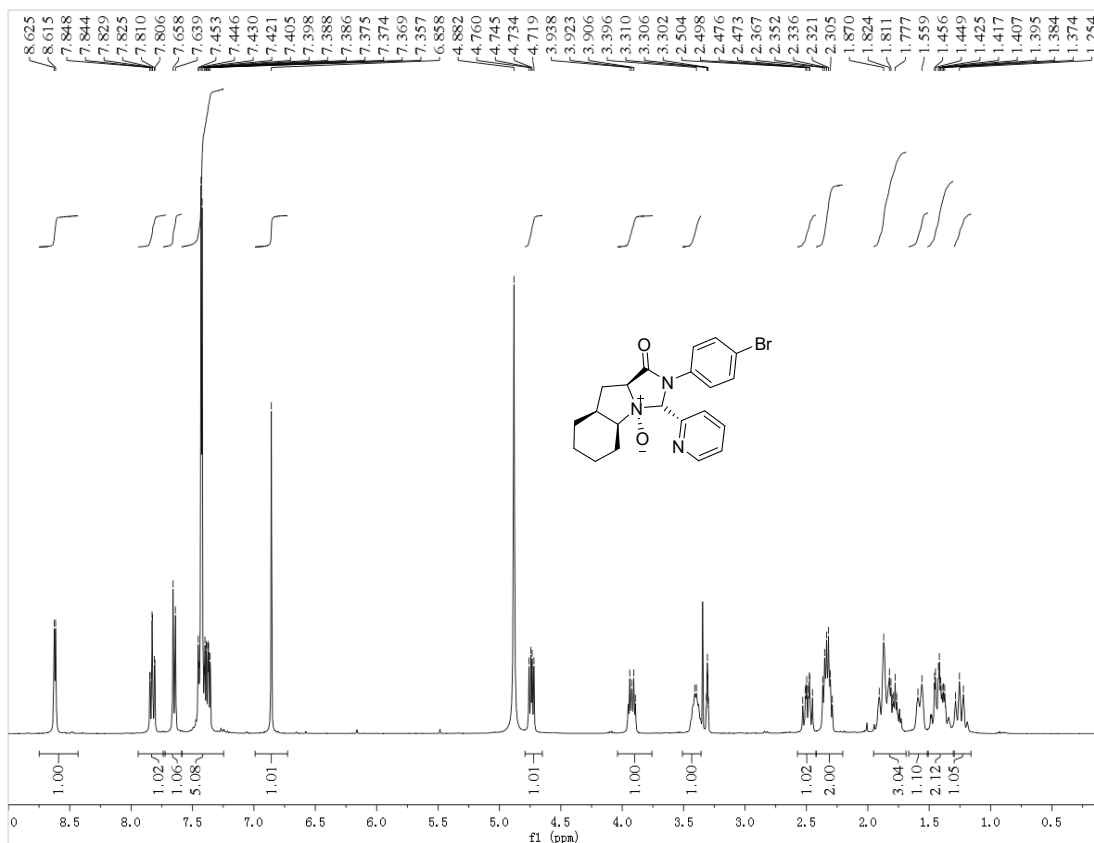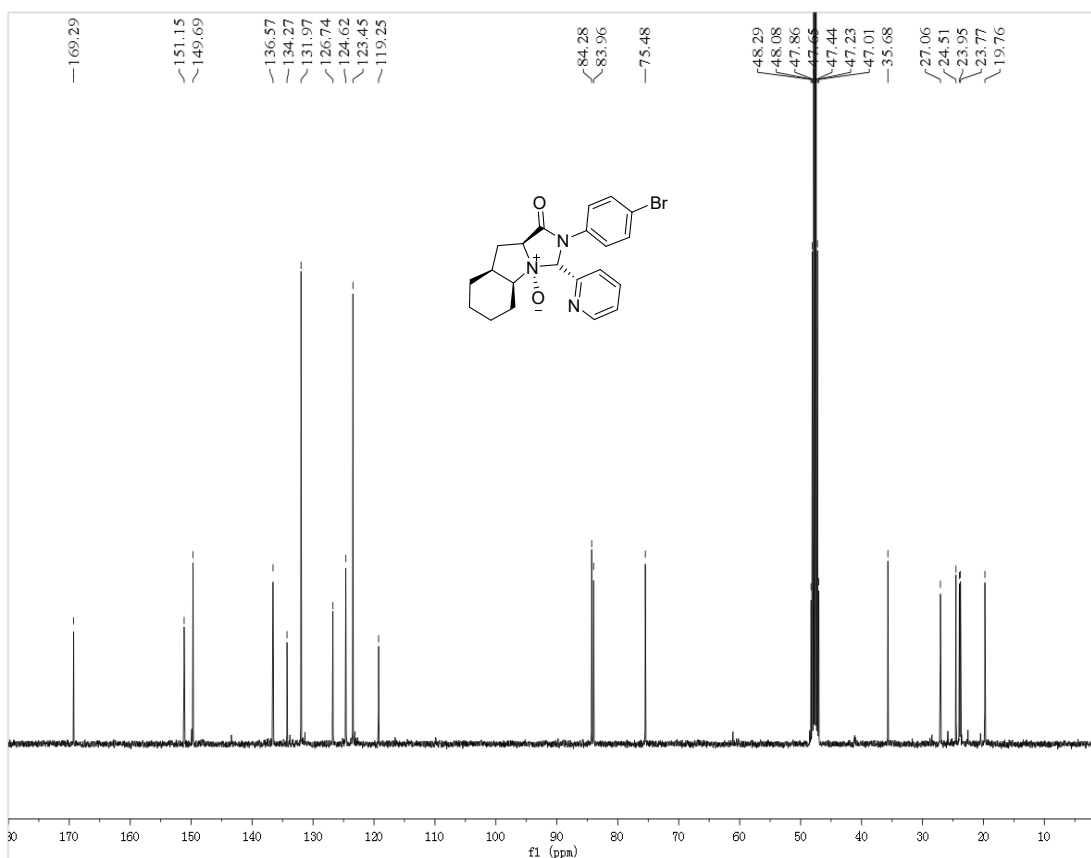

**<sup>1</sup>H and <sup>13</sup>C NMR of L1g**

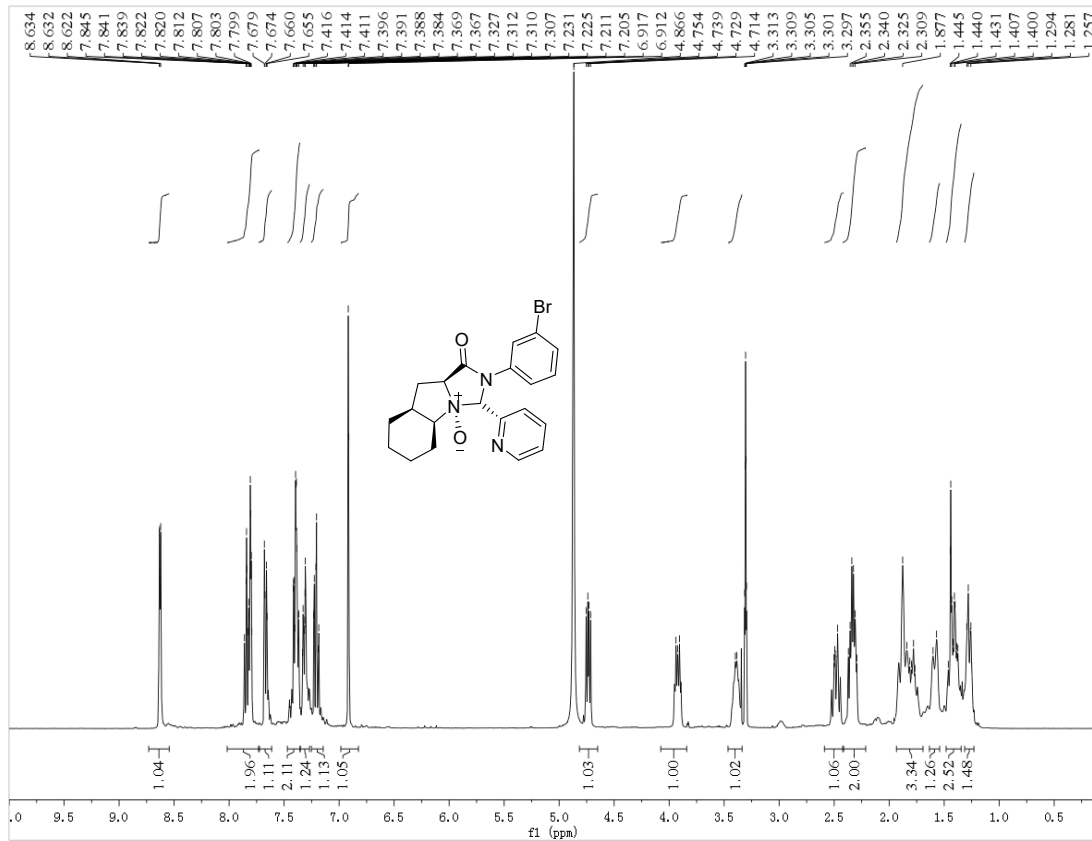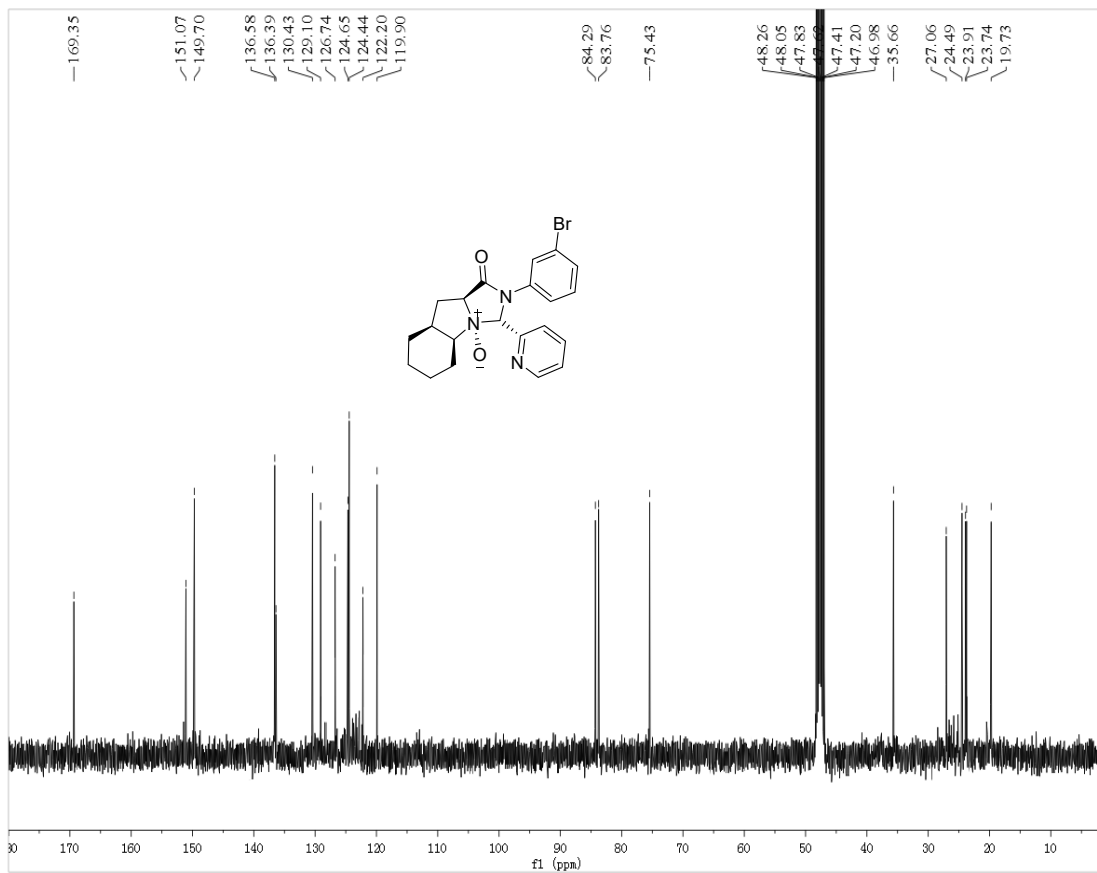

**<sup>1</sup>H and <sup>13</sup>C NMR of L1h**

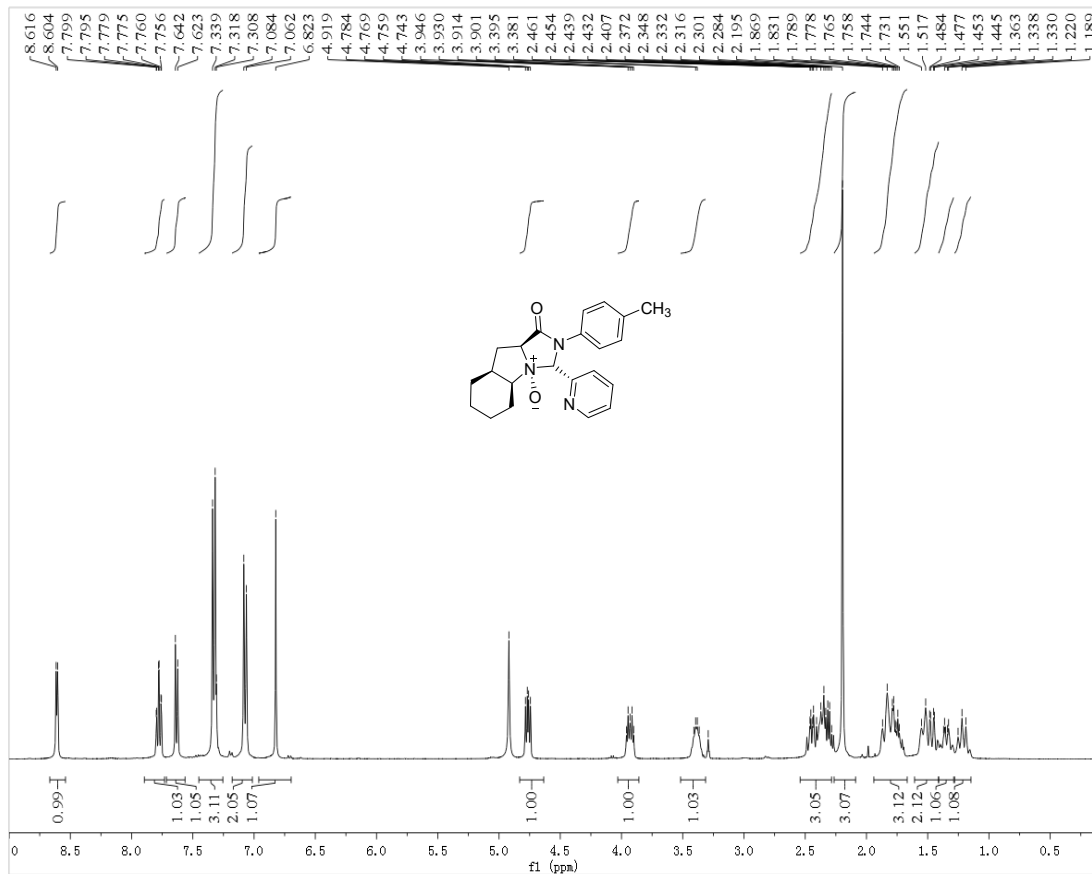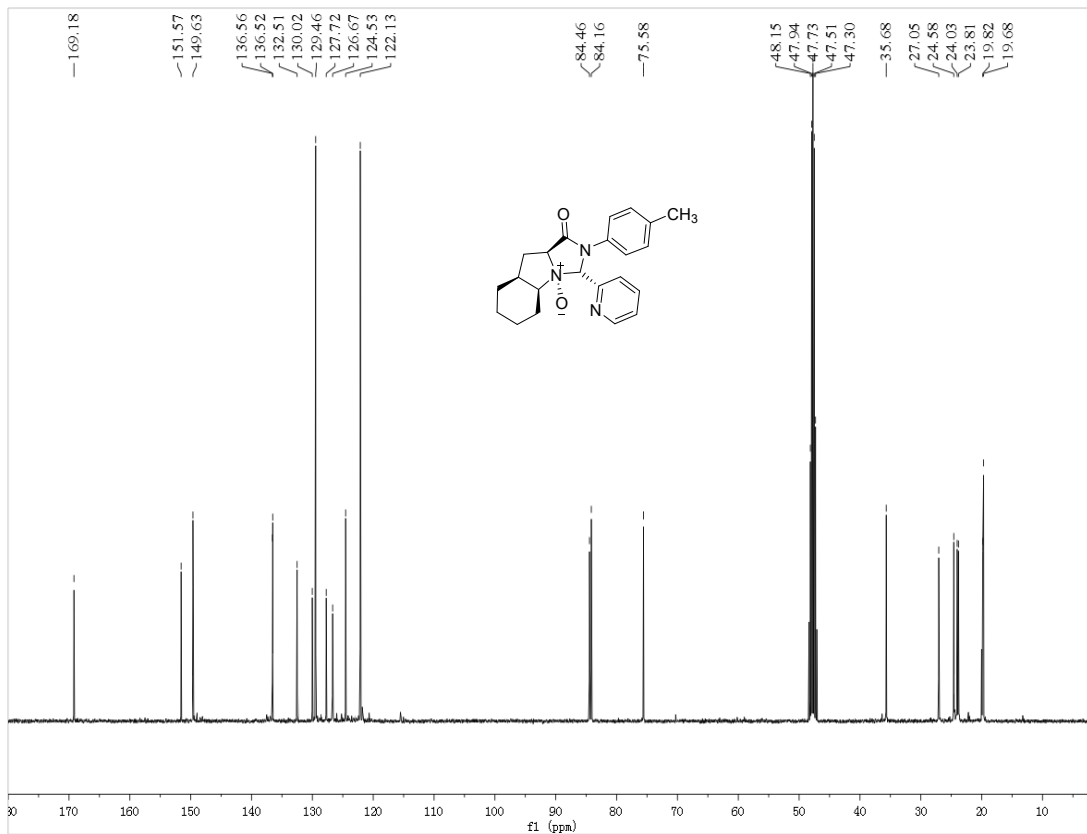

# <sup>1</sup>H and <sup>13</sup>C NMR of L1i

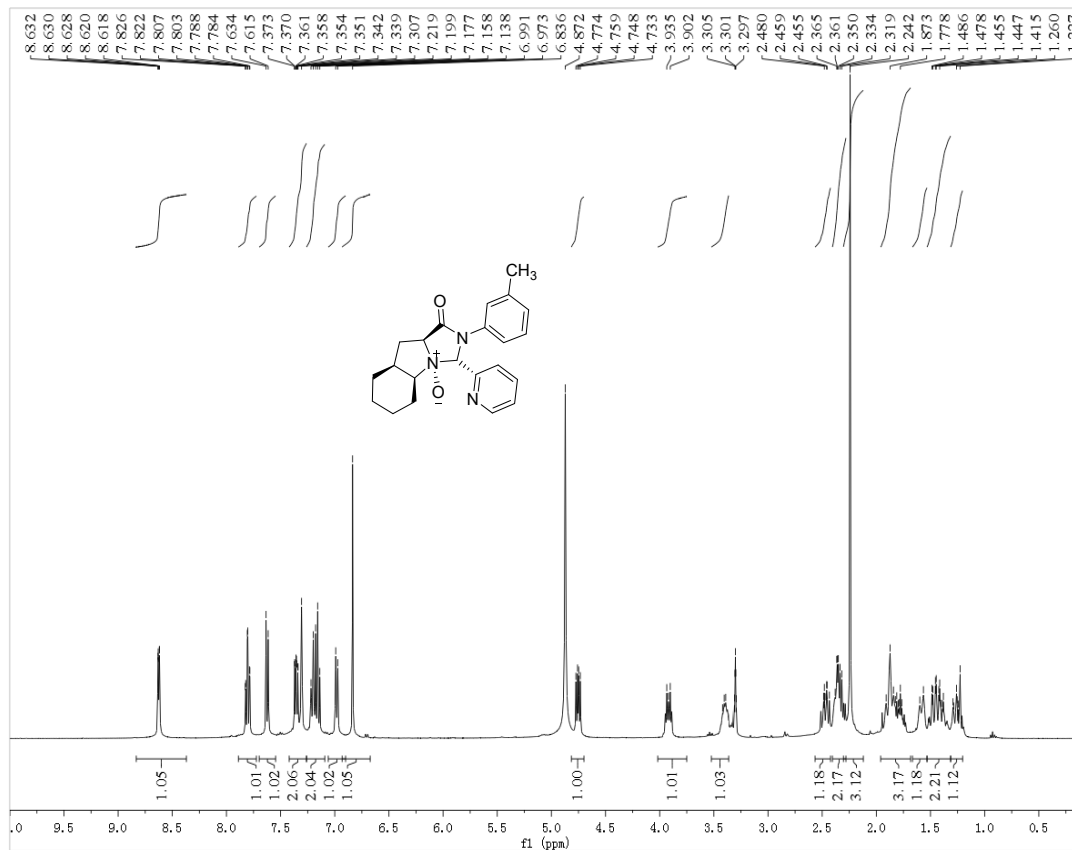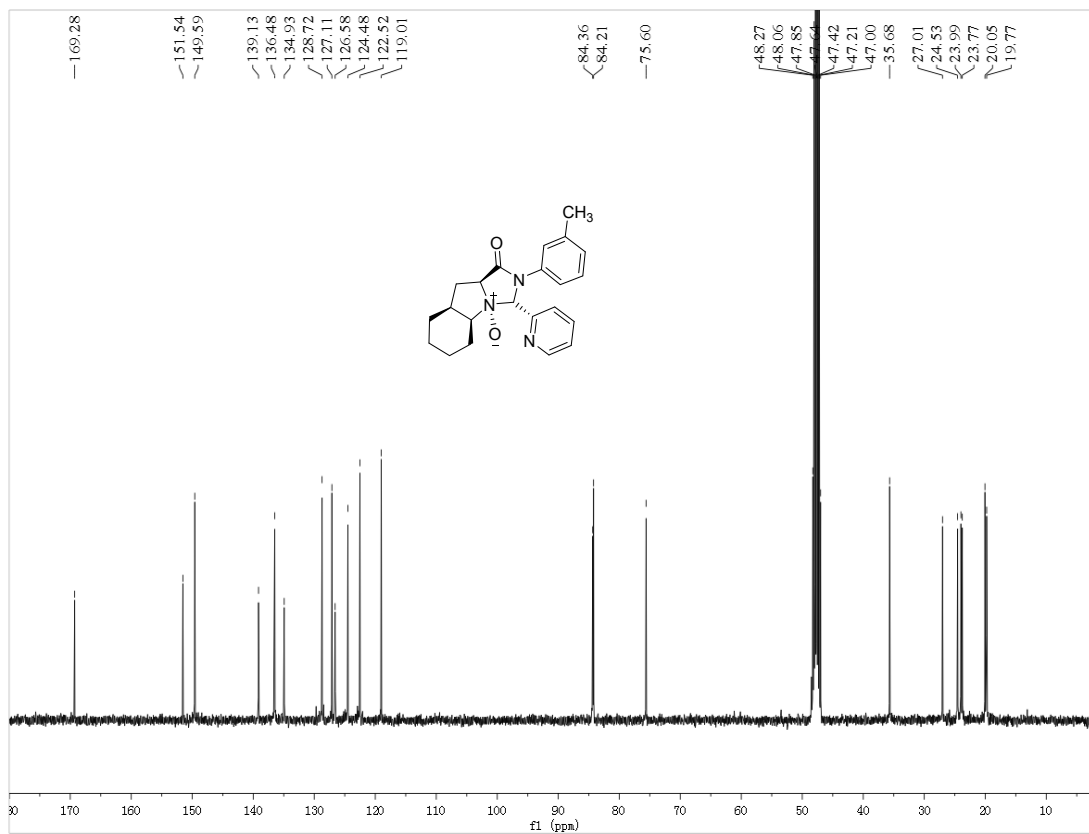

# <sup>1</sup>H and <sup>13</sup>C NMR of L1j

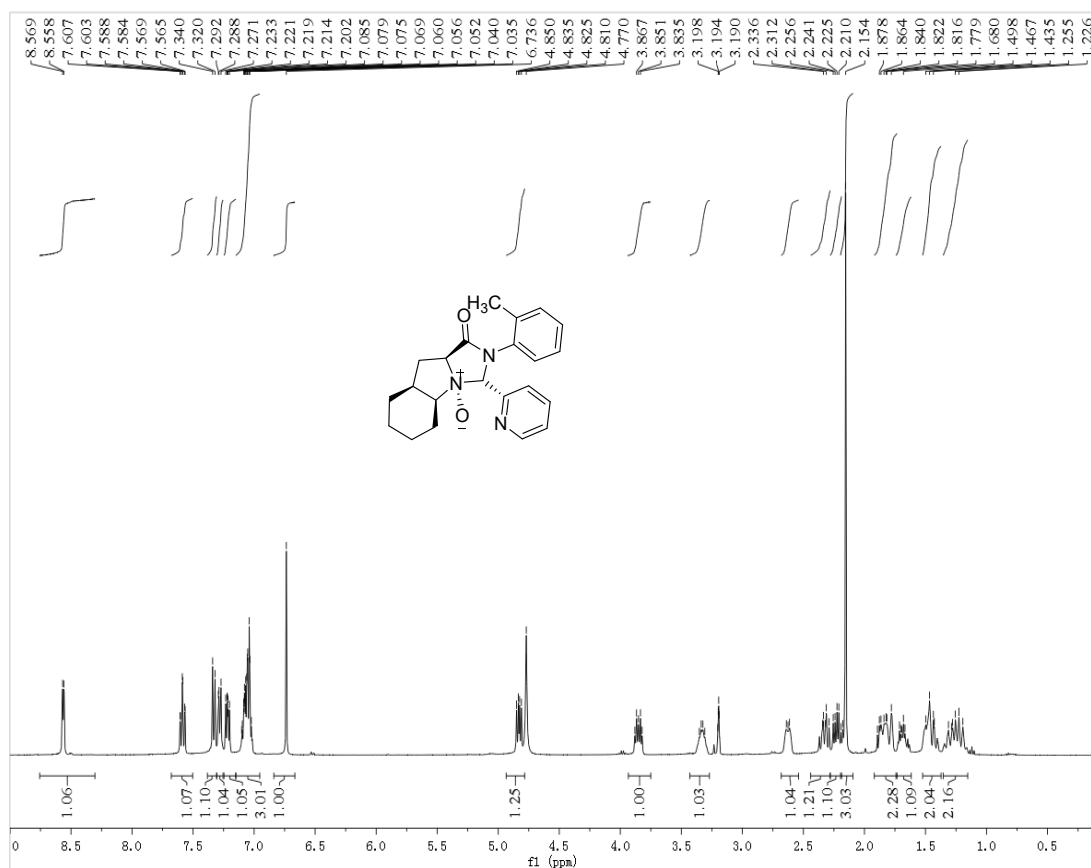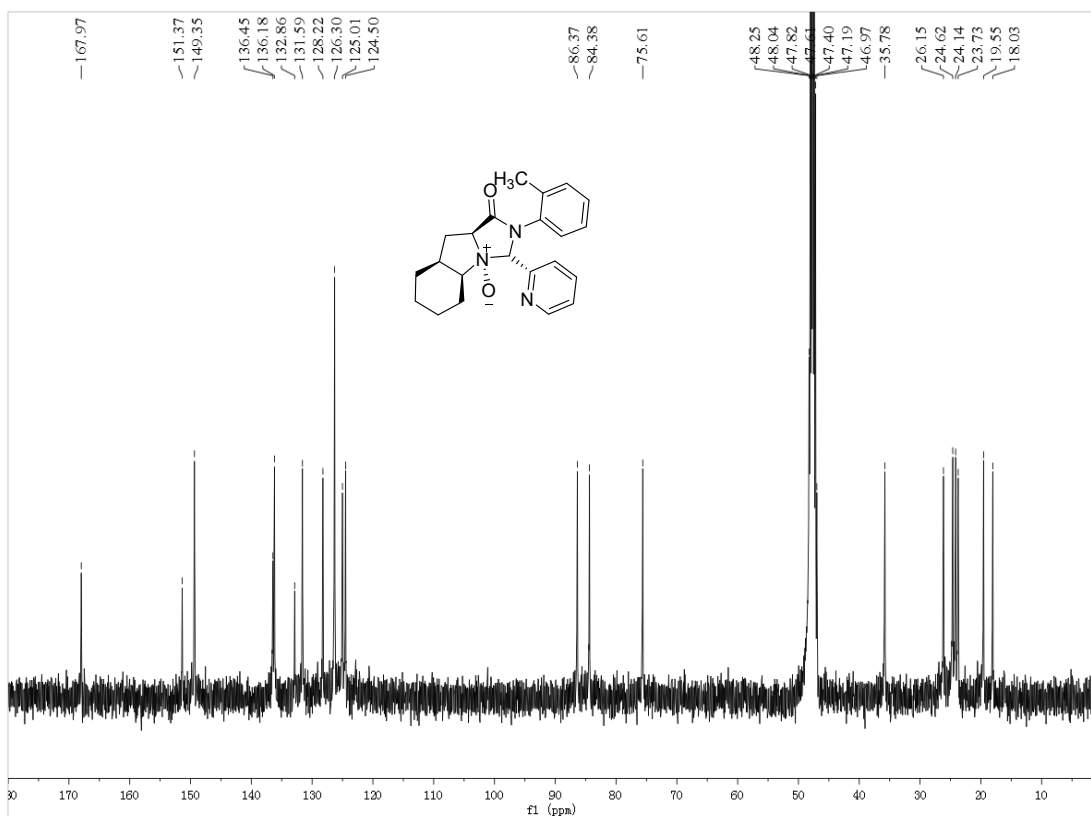



# <sup>1</sup>H and <sup>13</sup>C NMR of L1k

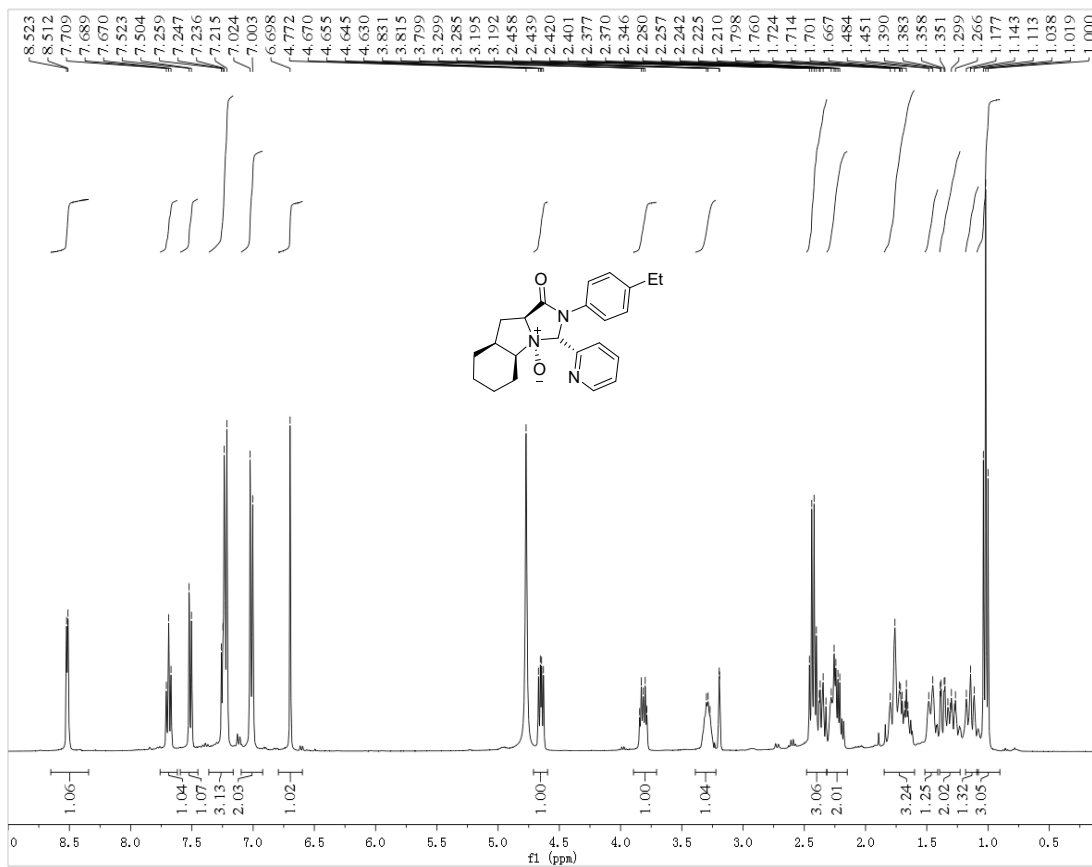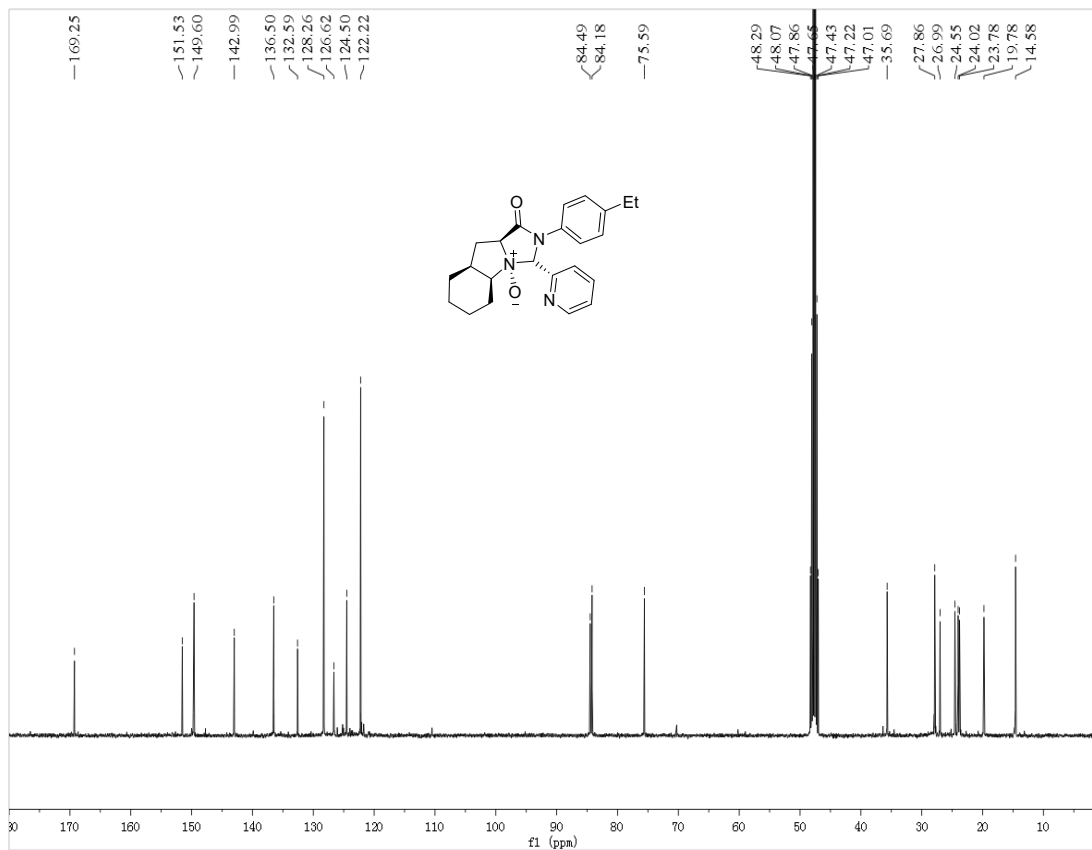

# <sup>1</sup>H and <sup>13</sup>C NMR of L11

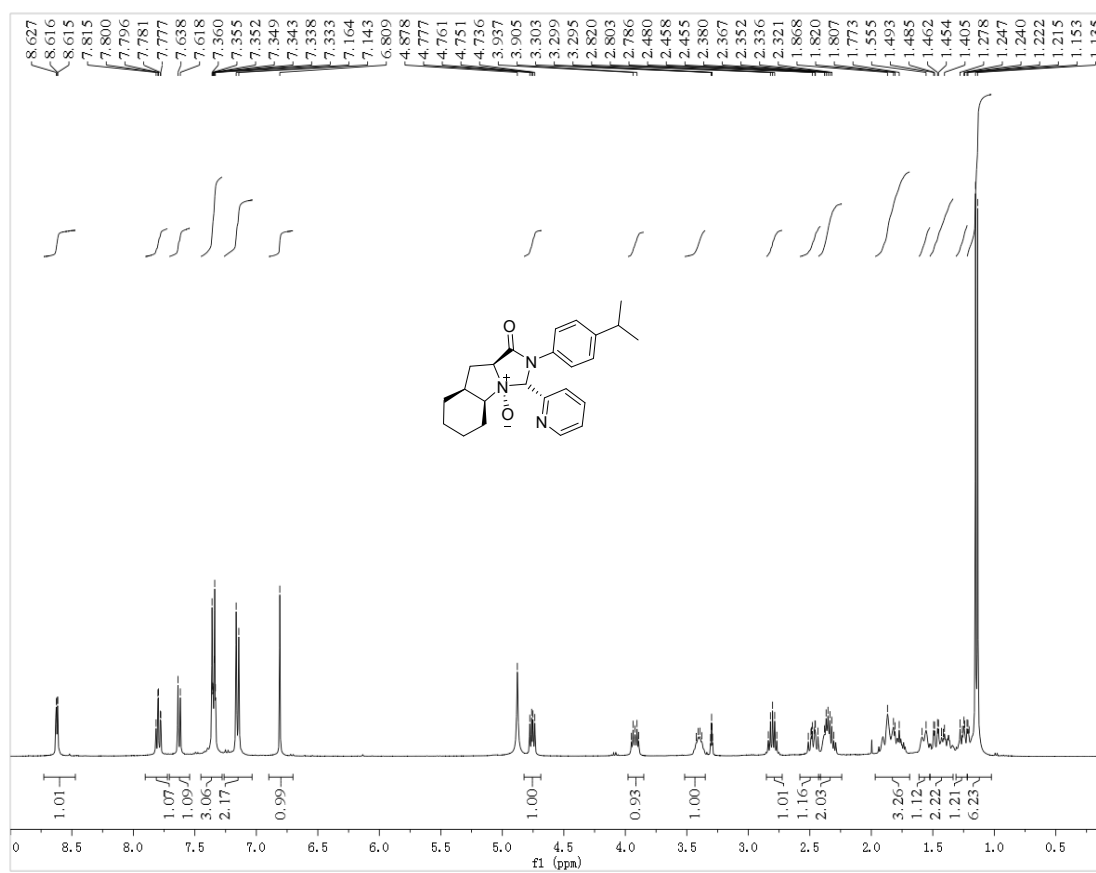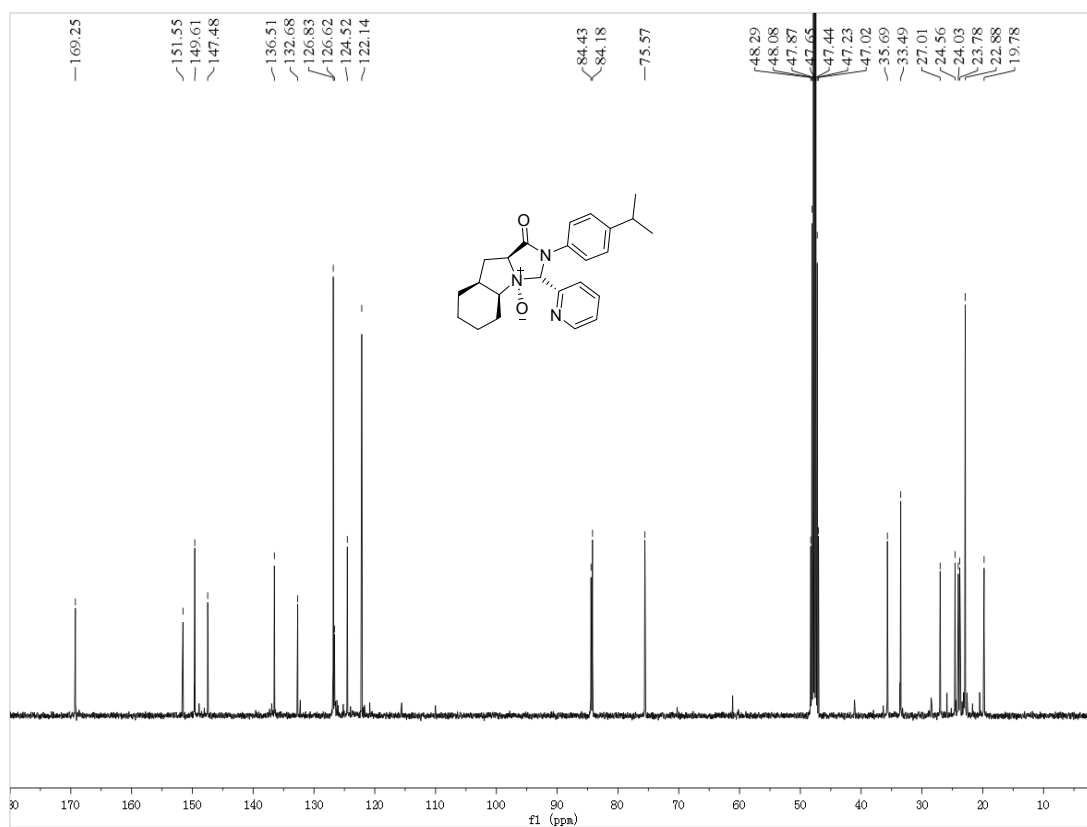

**<sup>1</sup>H and <sup>13</sup>C NMR of L1m**

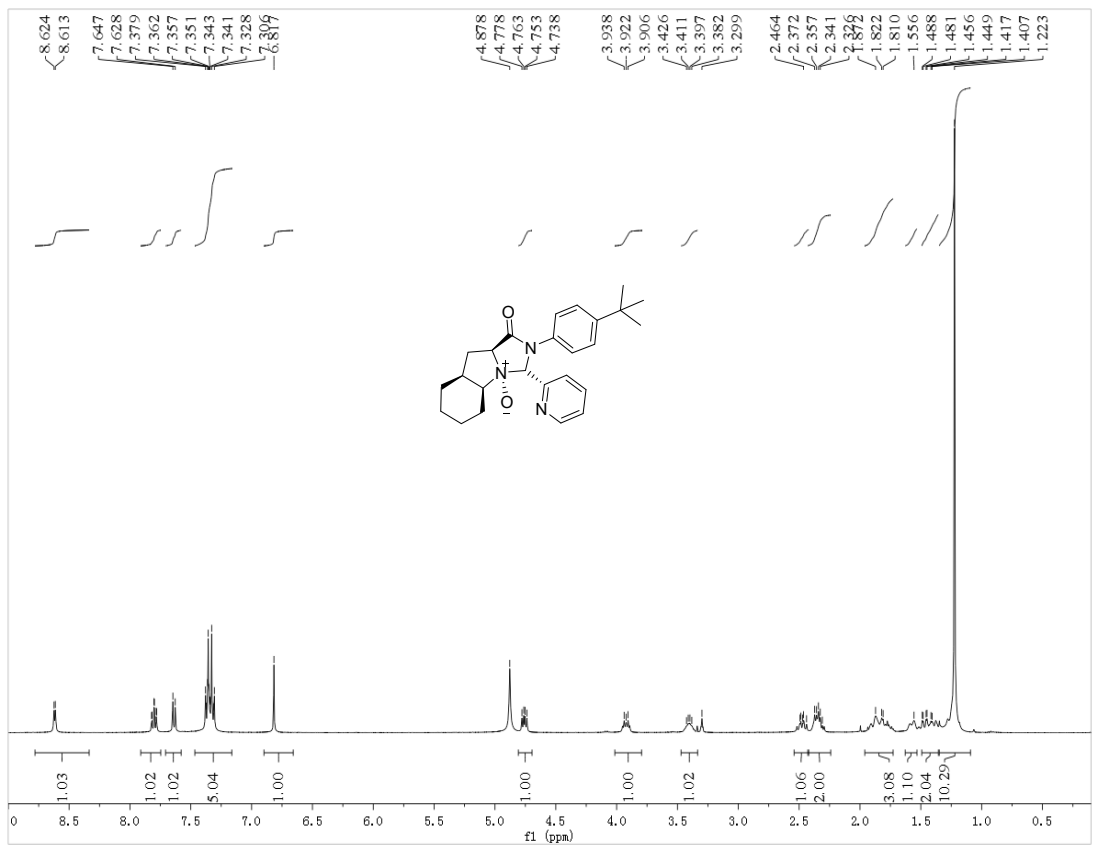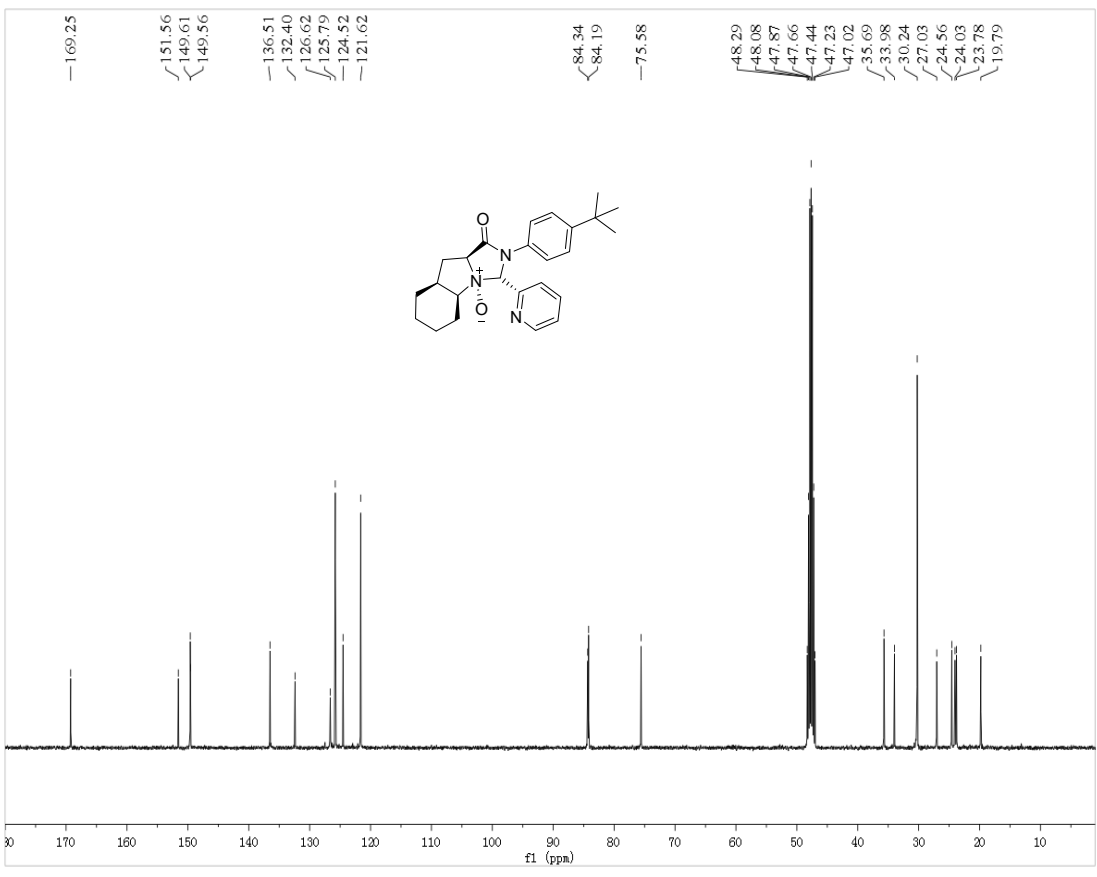

# <sup>1</sup>H and <sup>13</sup>C NMR of L1n

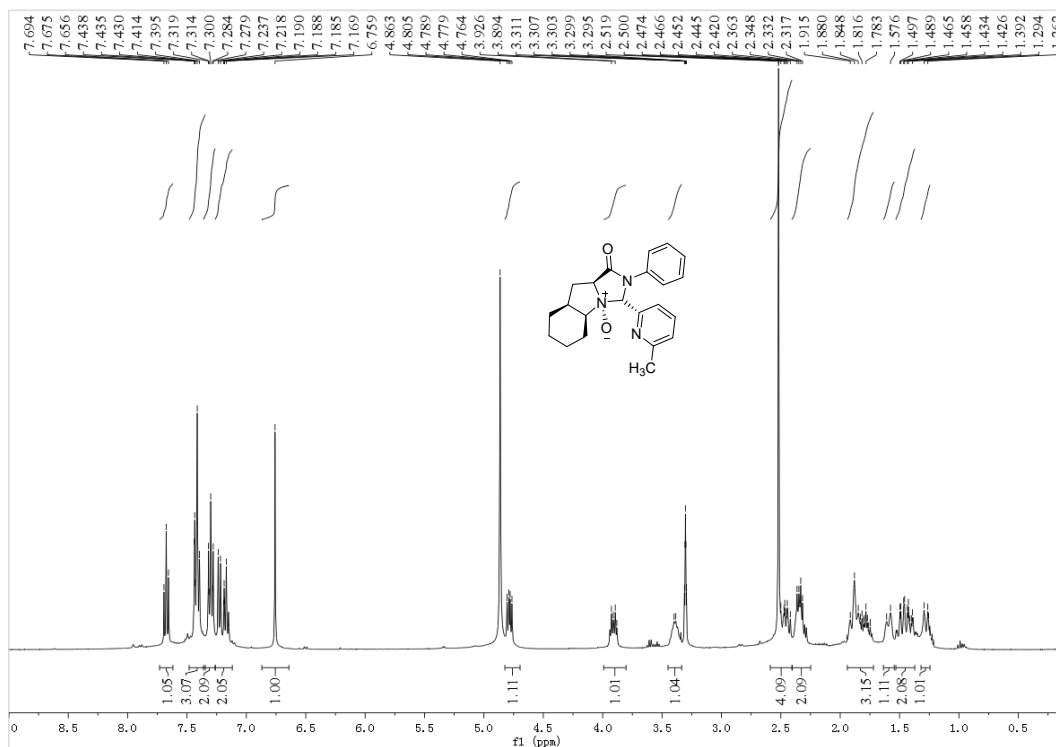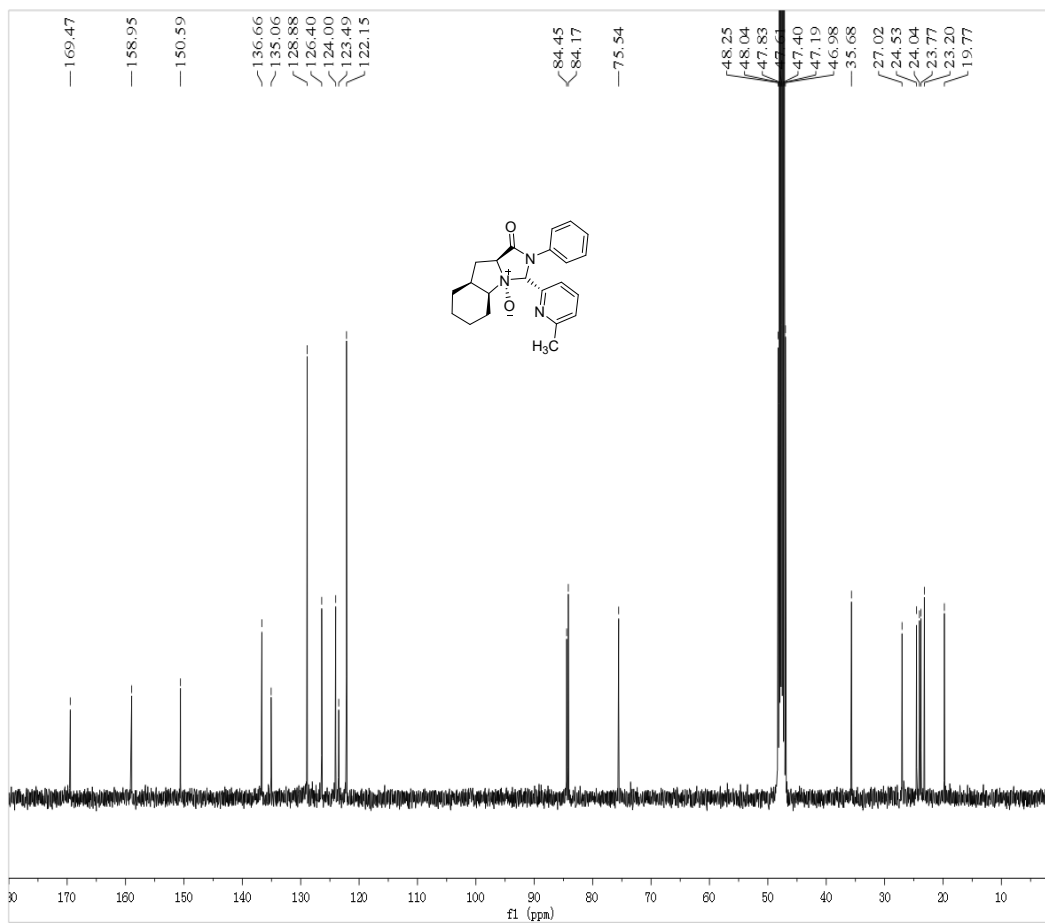

# <sup>1</sup>H and <sup>13</sup>C NMR of L1o

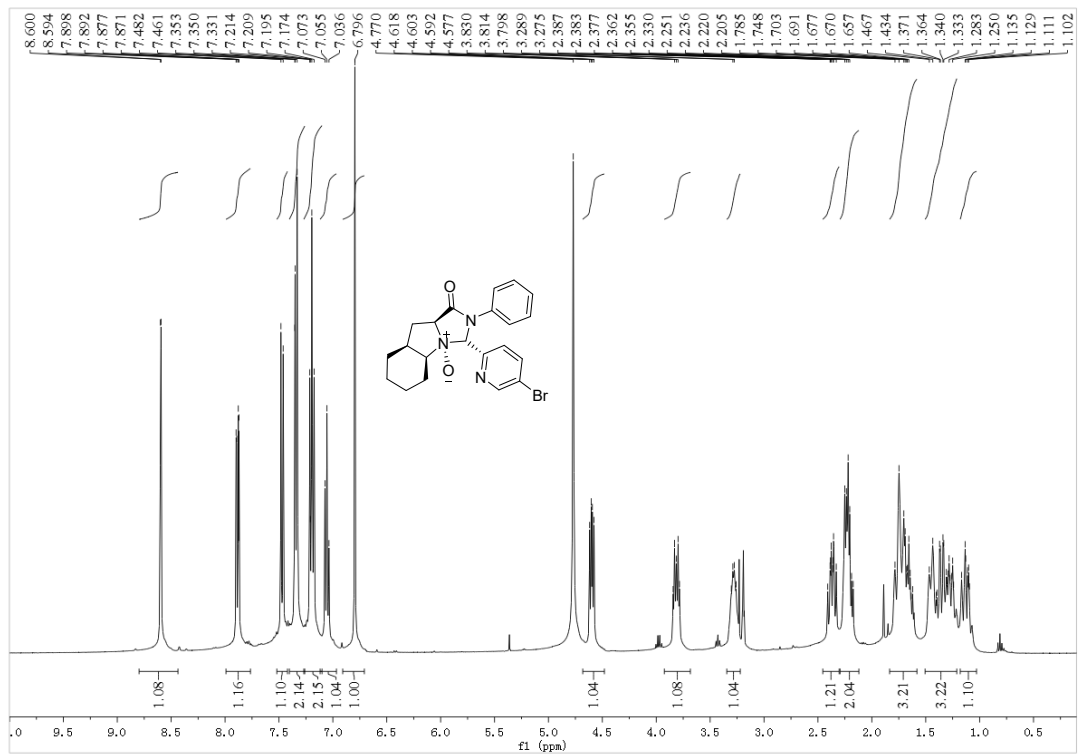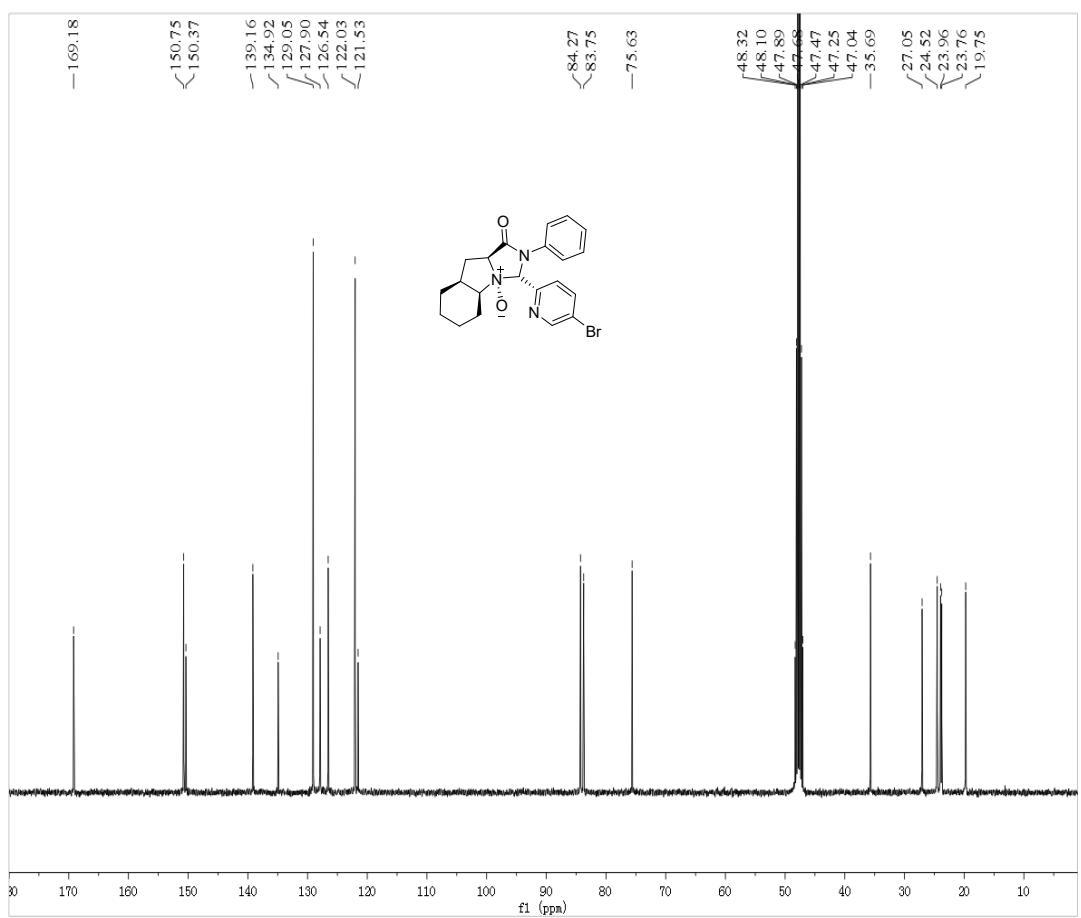

# <sup>1</sup>H and <sup>13</sup>C NMR of 6a

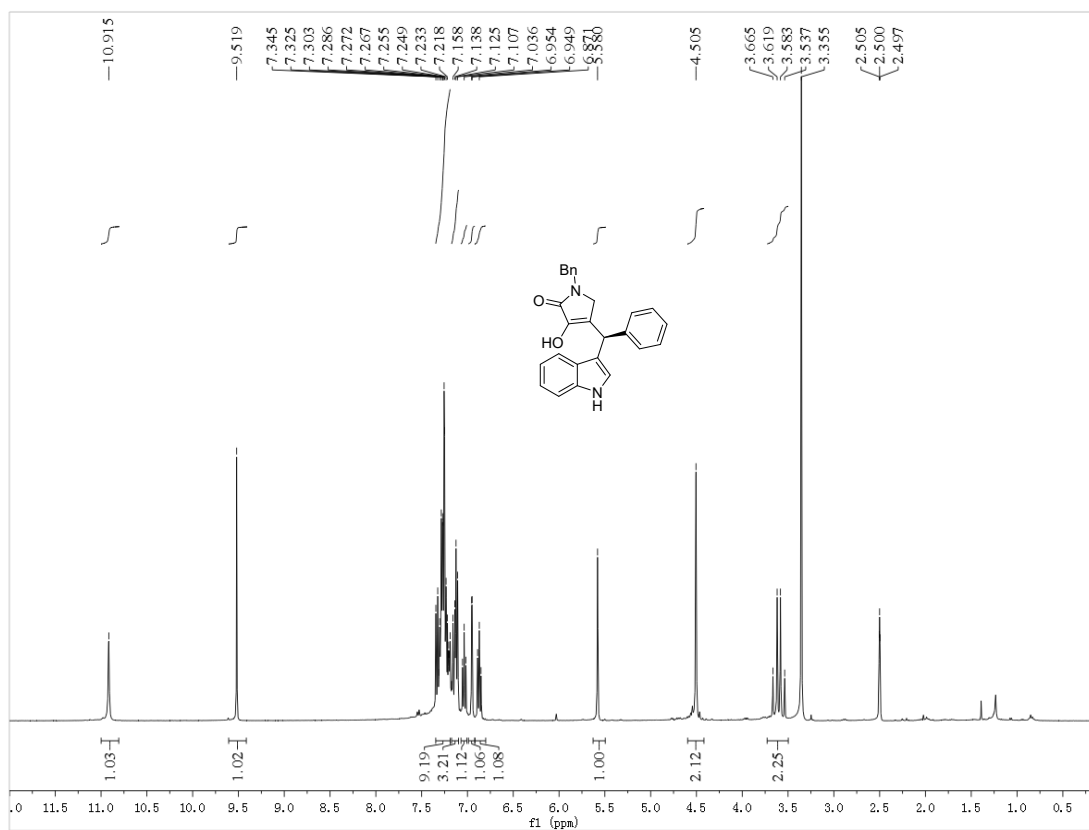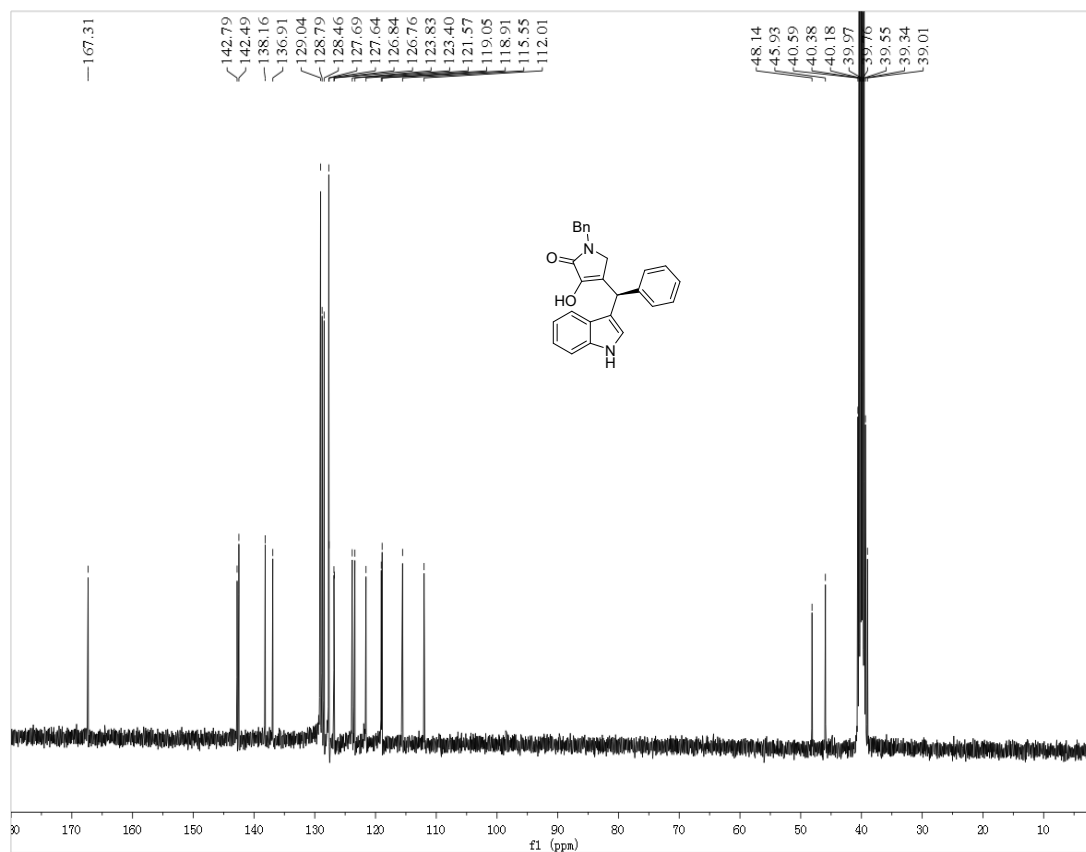

## HPLC of 6a

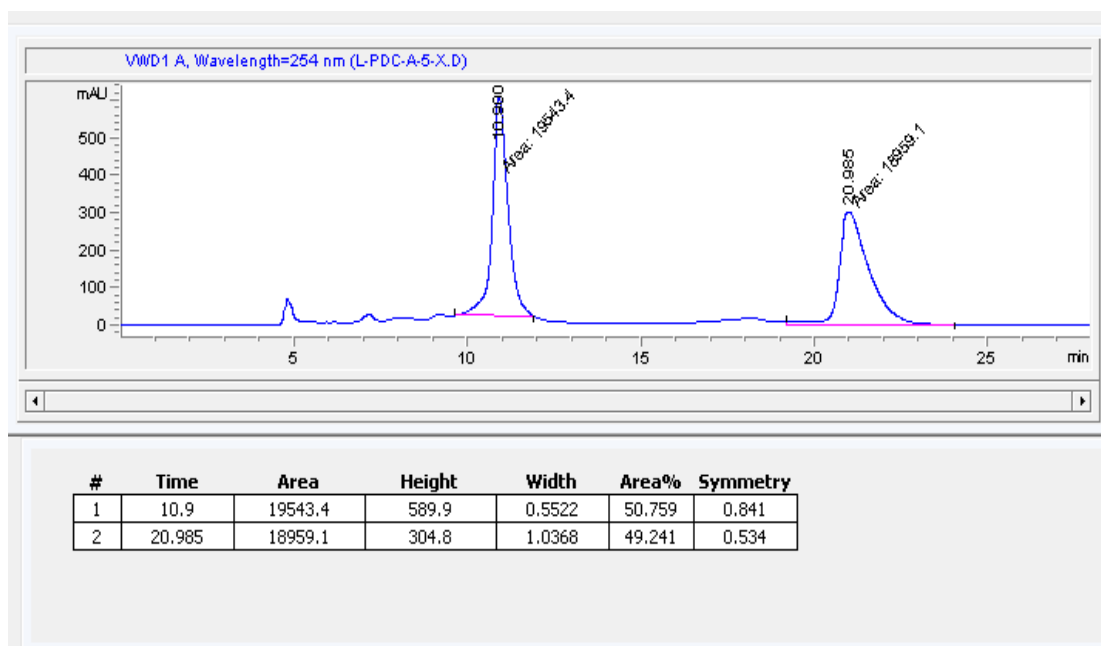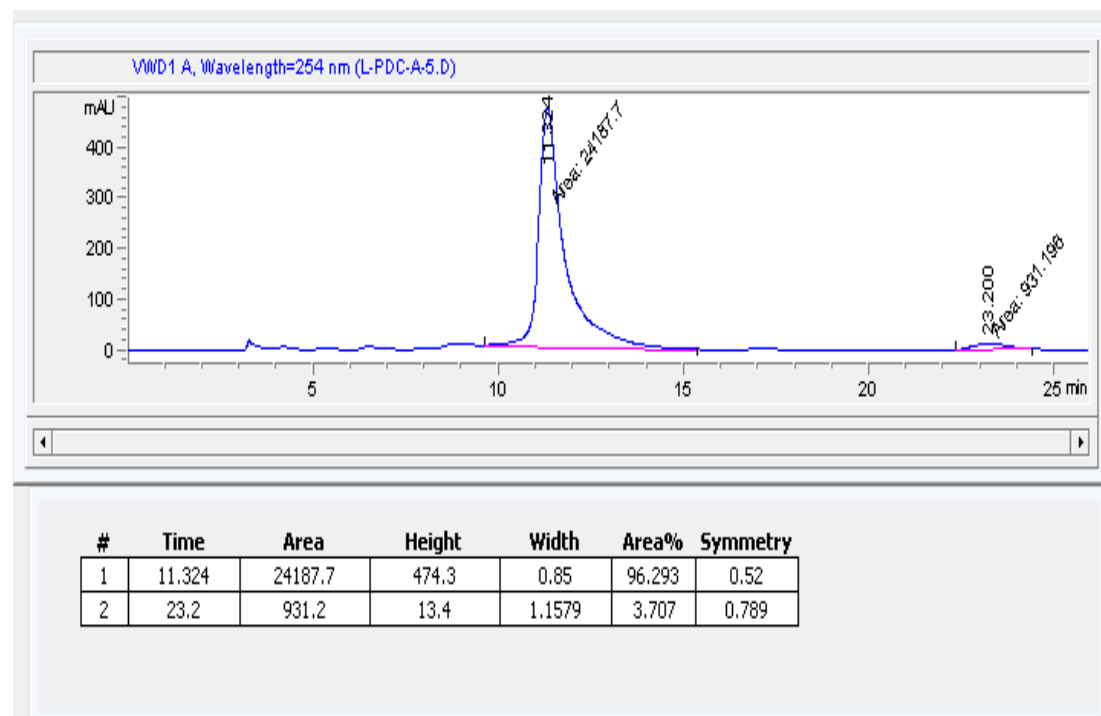

### <sup>1</sup>H and <sup>13</sup>C NMR of 6b

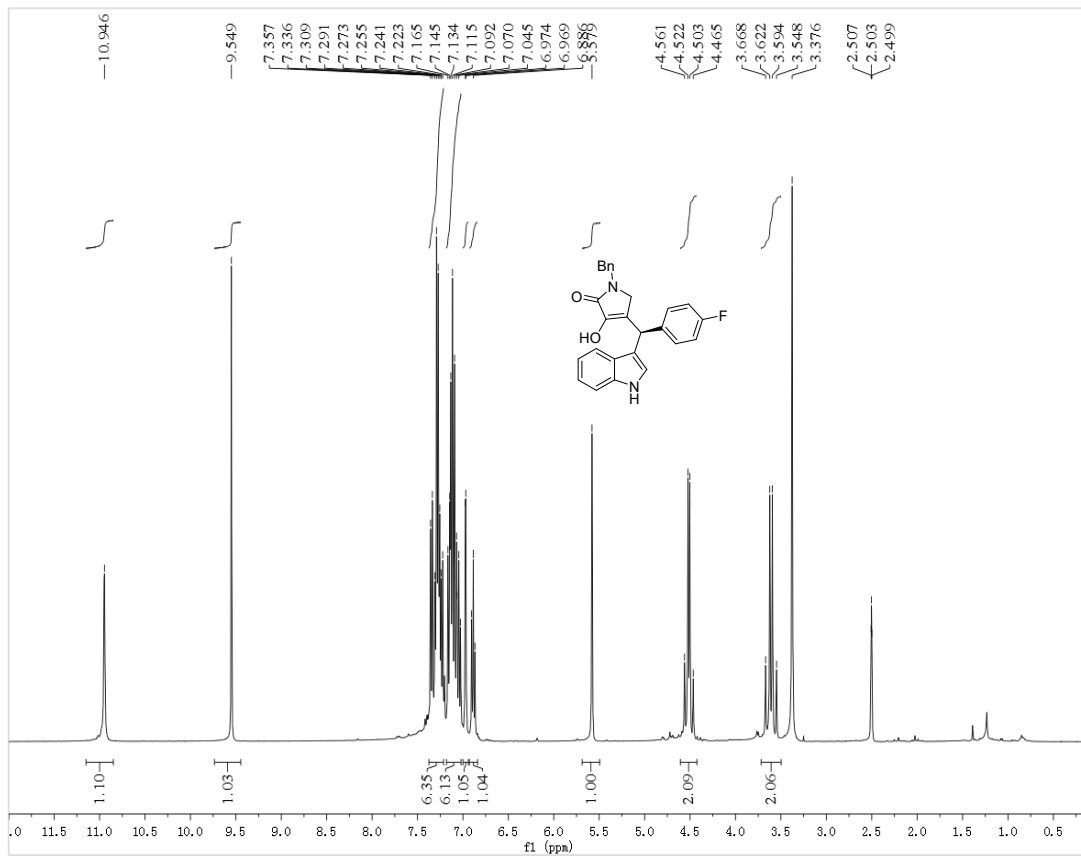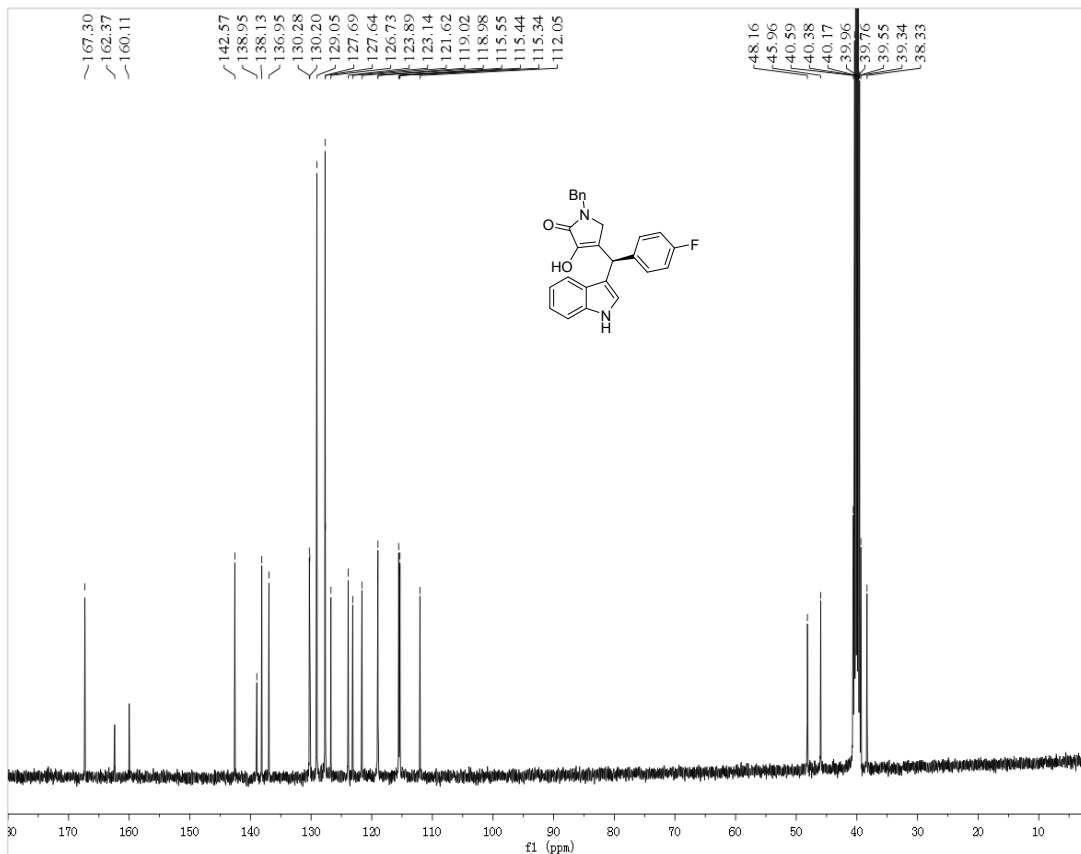



### HPLC of 6b

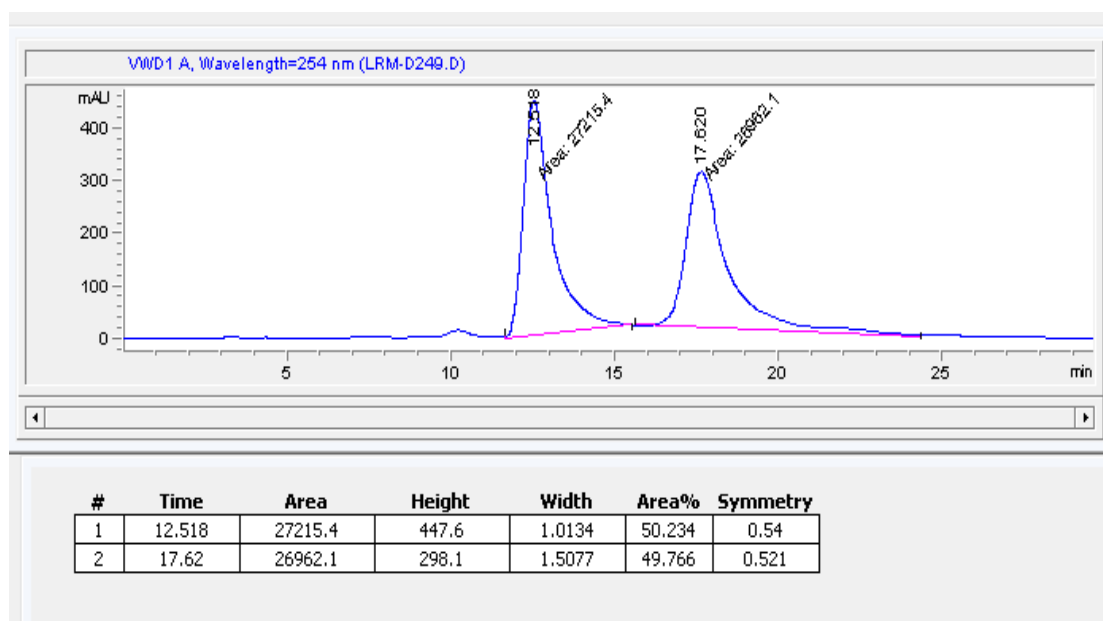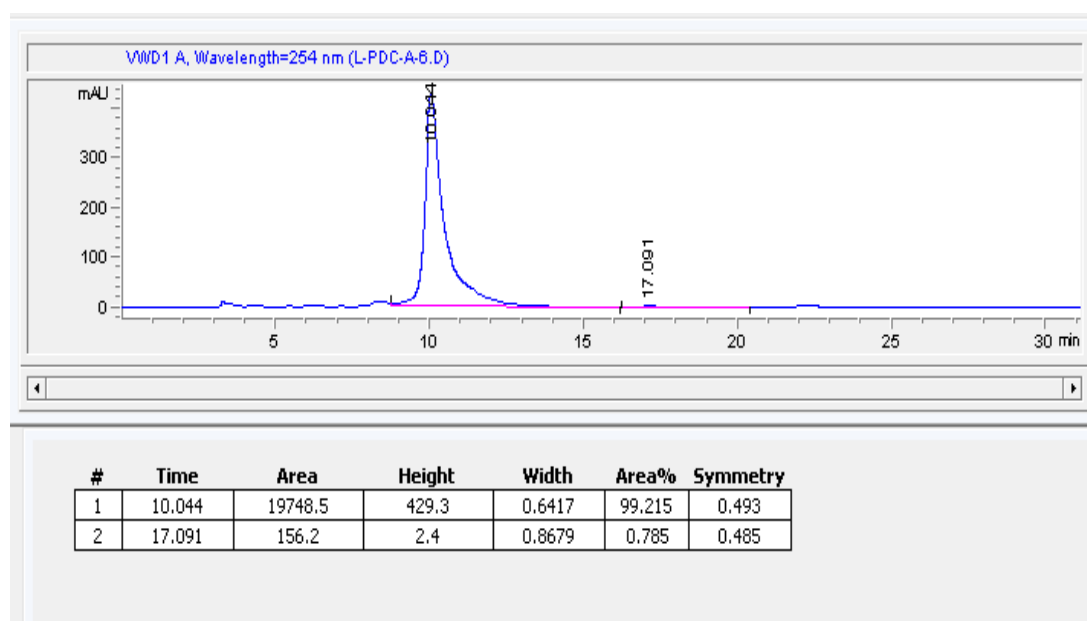

# <sup>1</sup>H and <sup>13</sup>C NMR of 6c

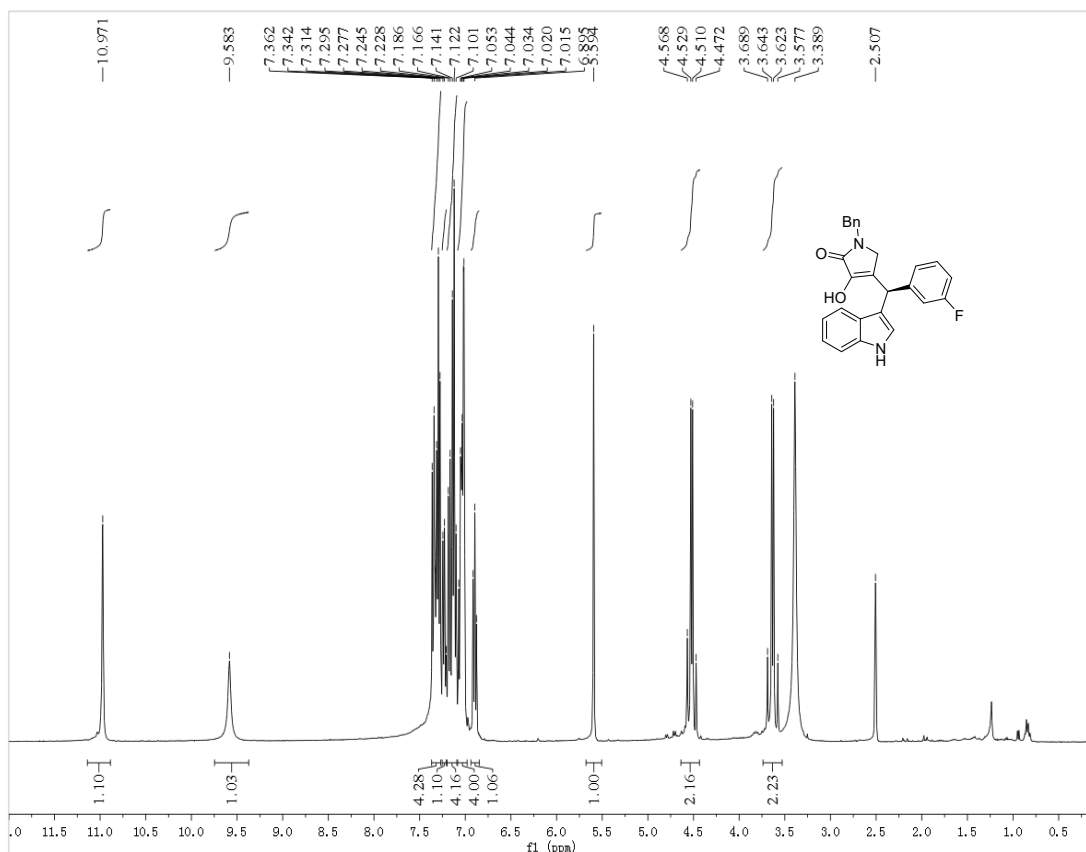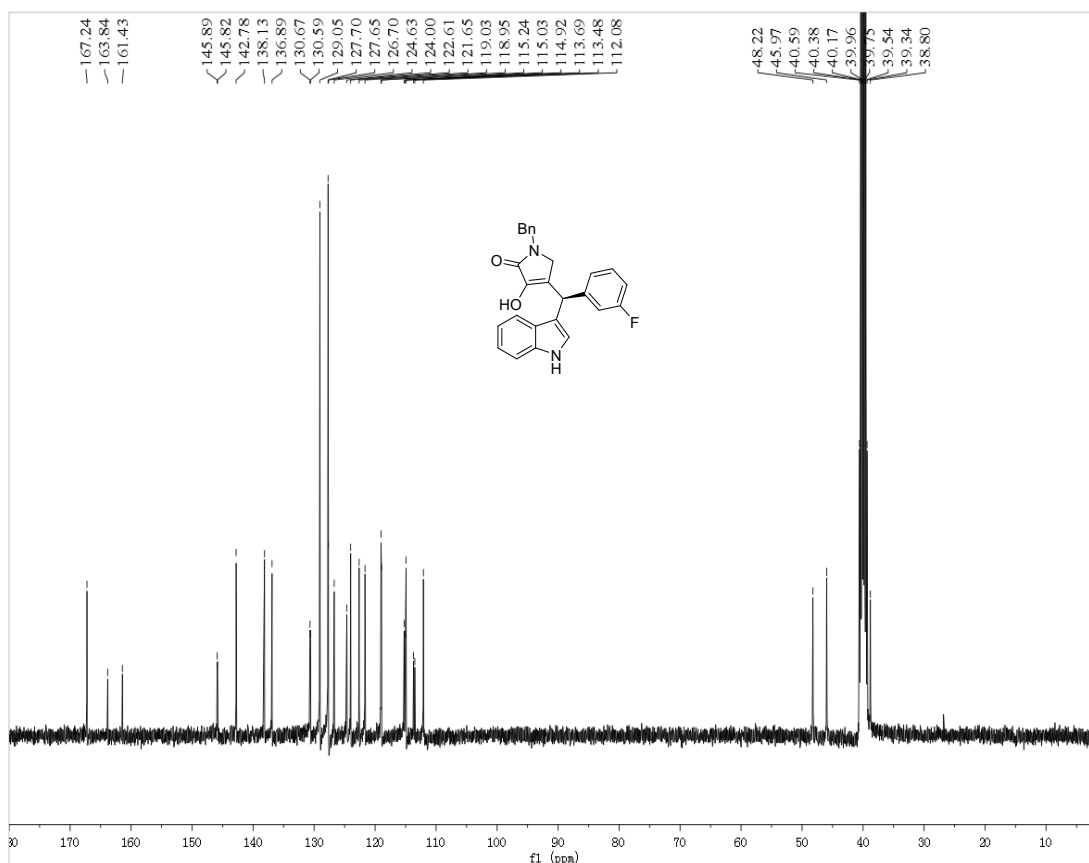

### HPLC of 6c

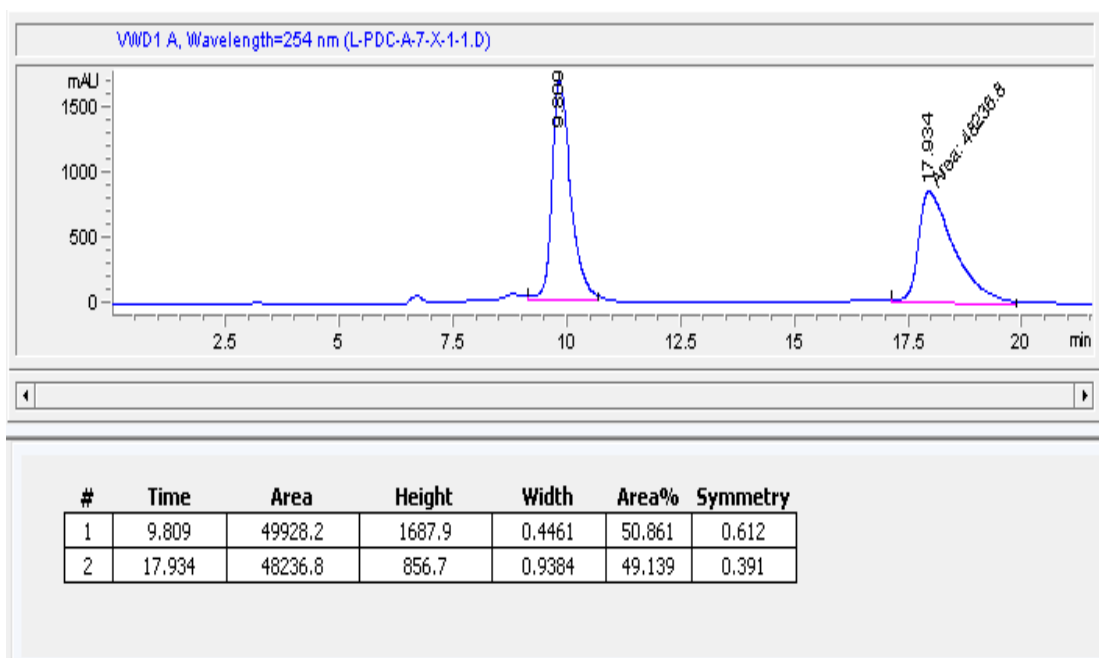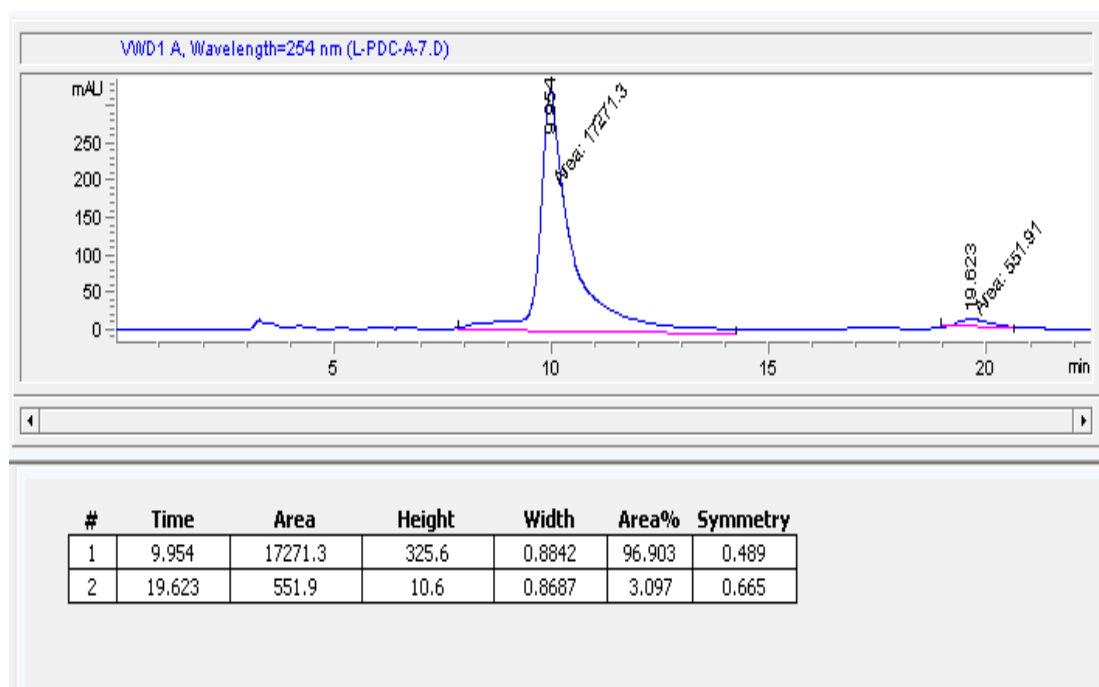

### $^1\text{H}$ and $^{13}\text{C}$ NMR of 6d

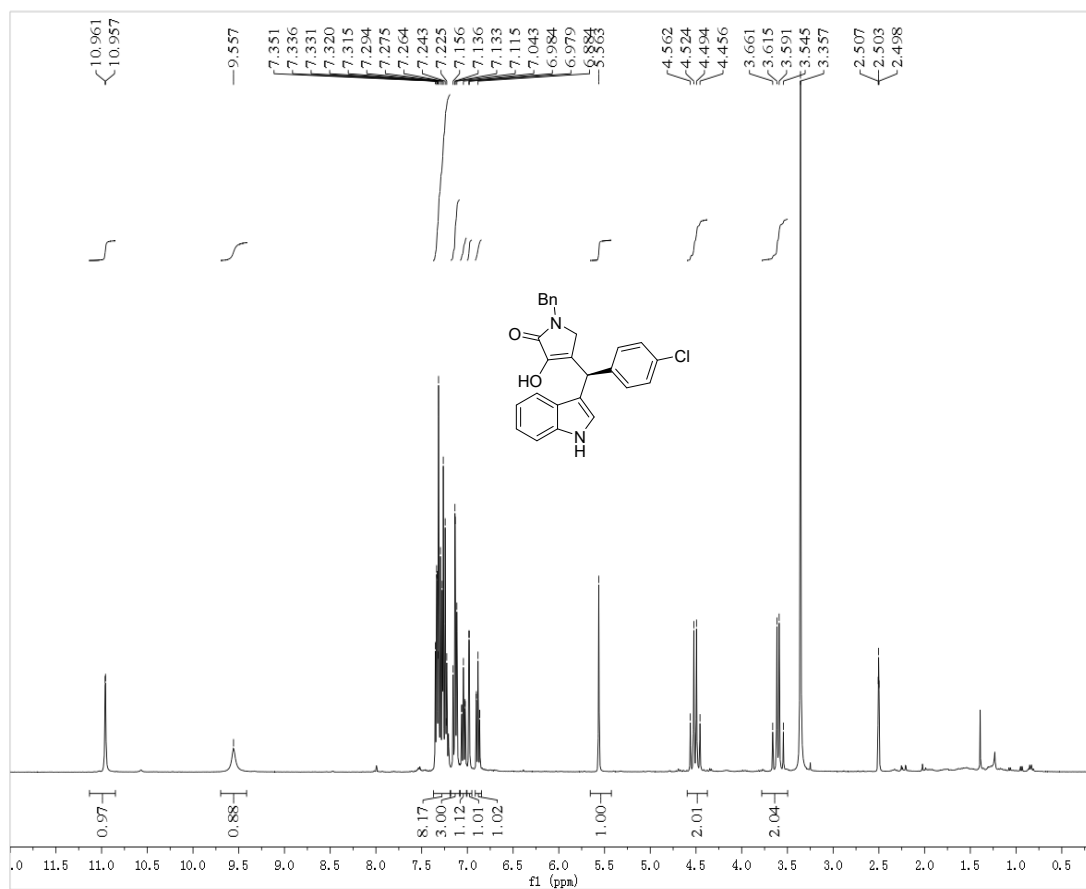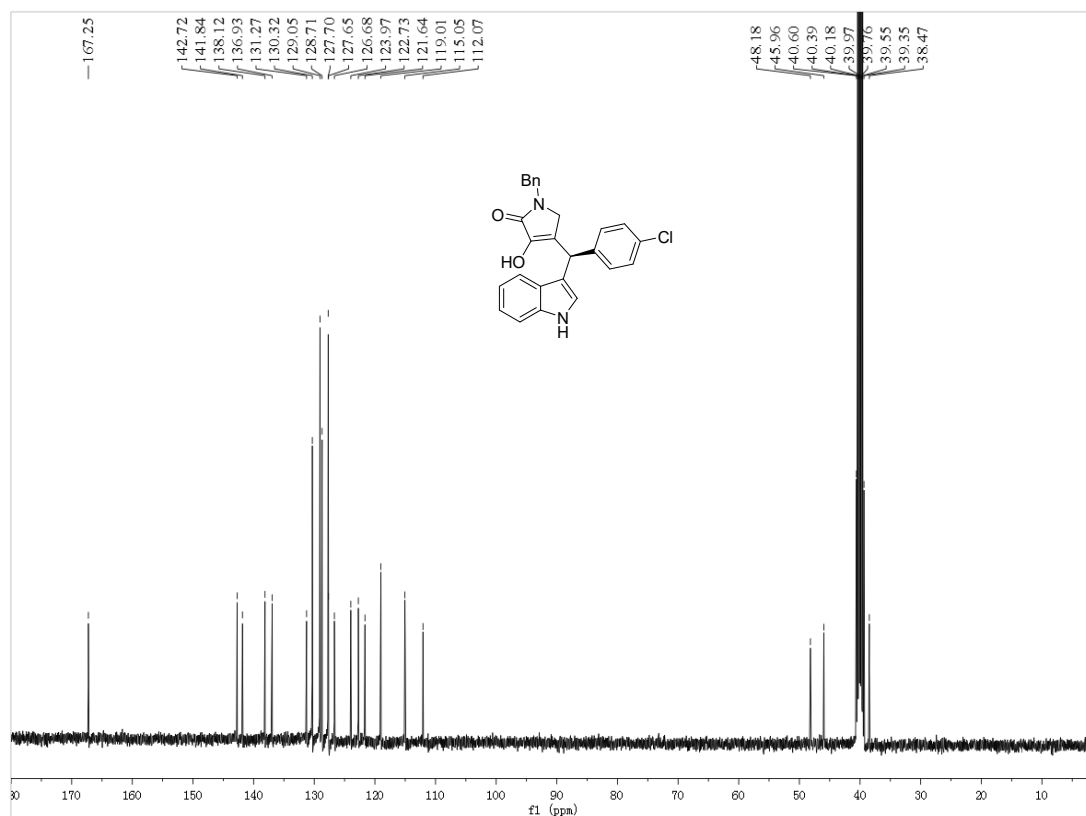

### HPLC of 6d

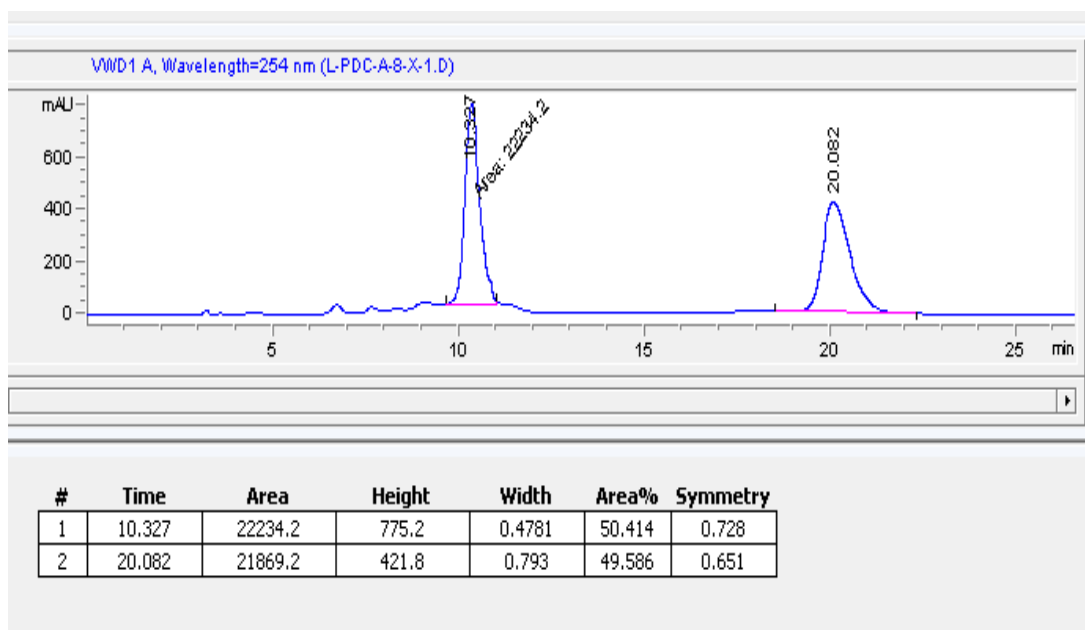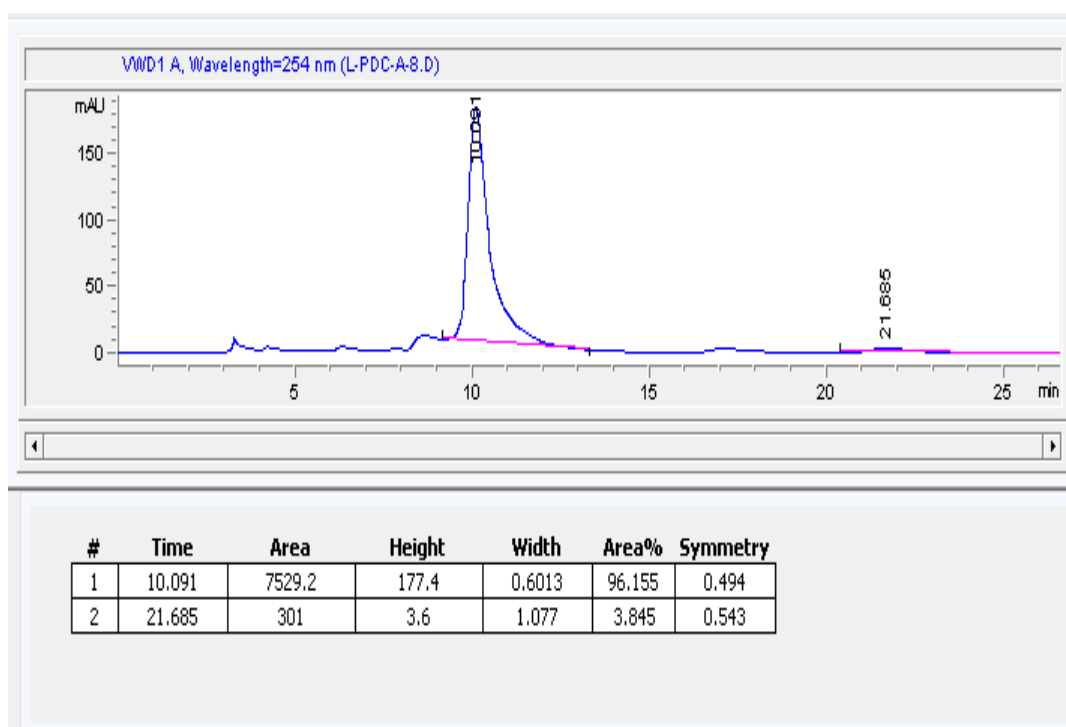

# <sup>1</sup>H and <sup>13</sup>C NMR of 6e

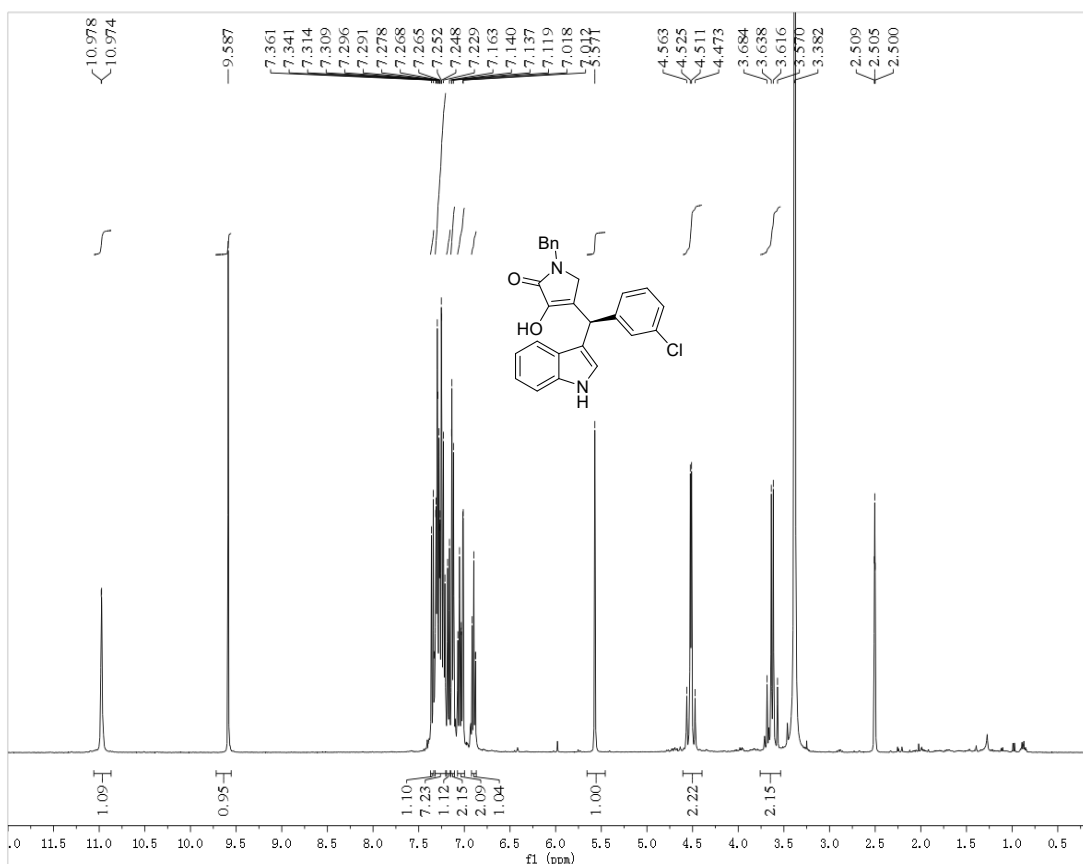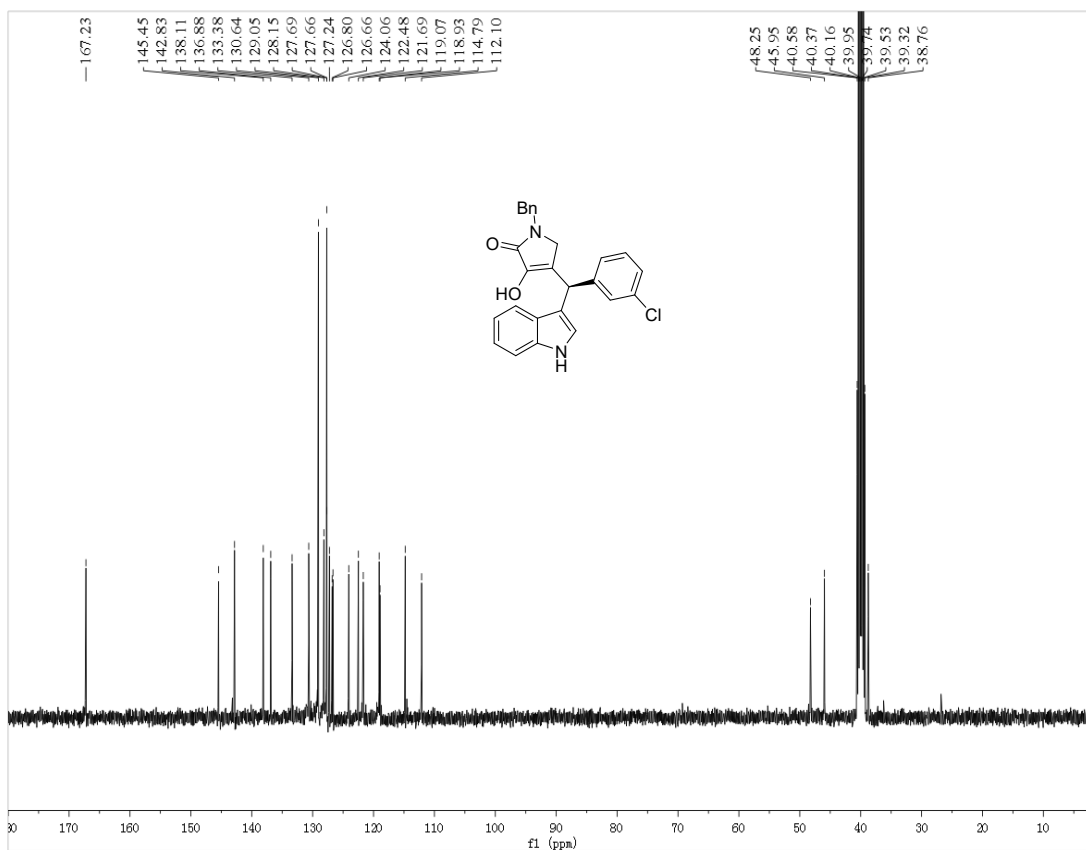

### HPLC of 6e

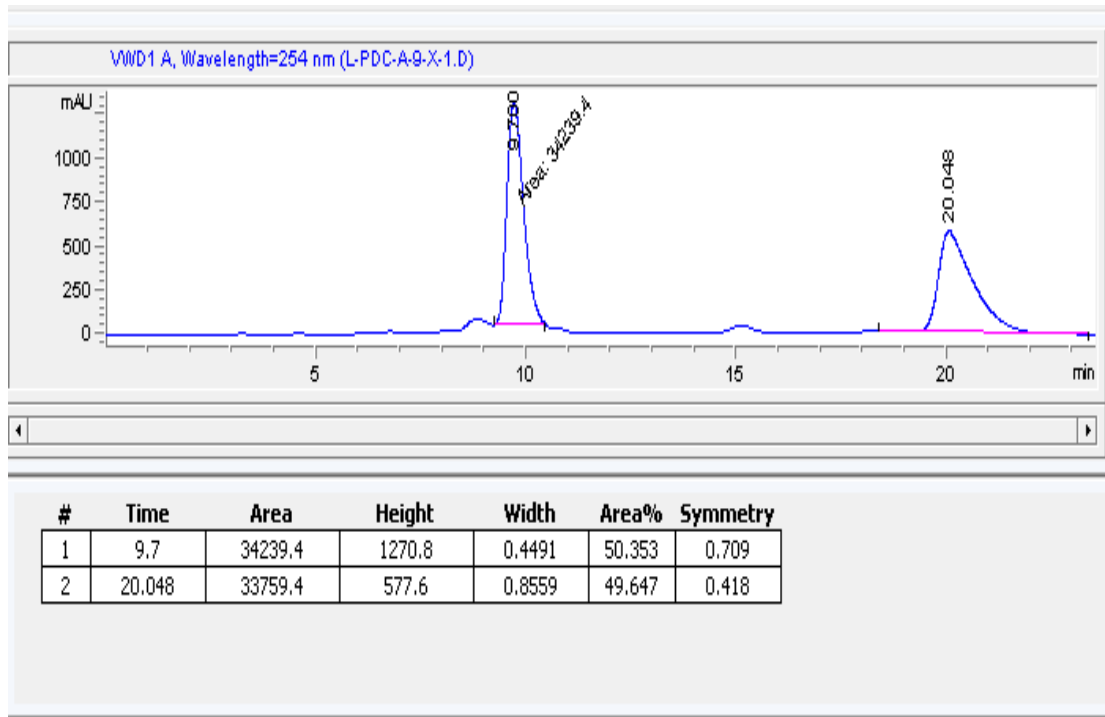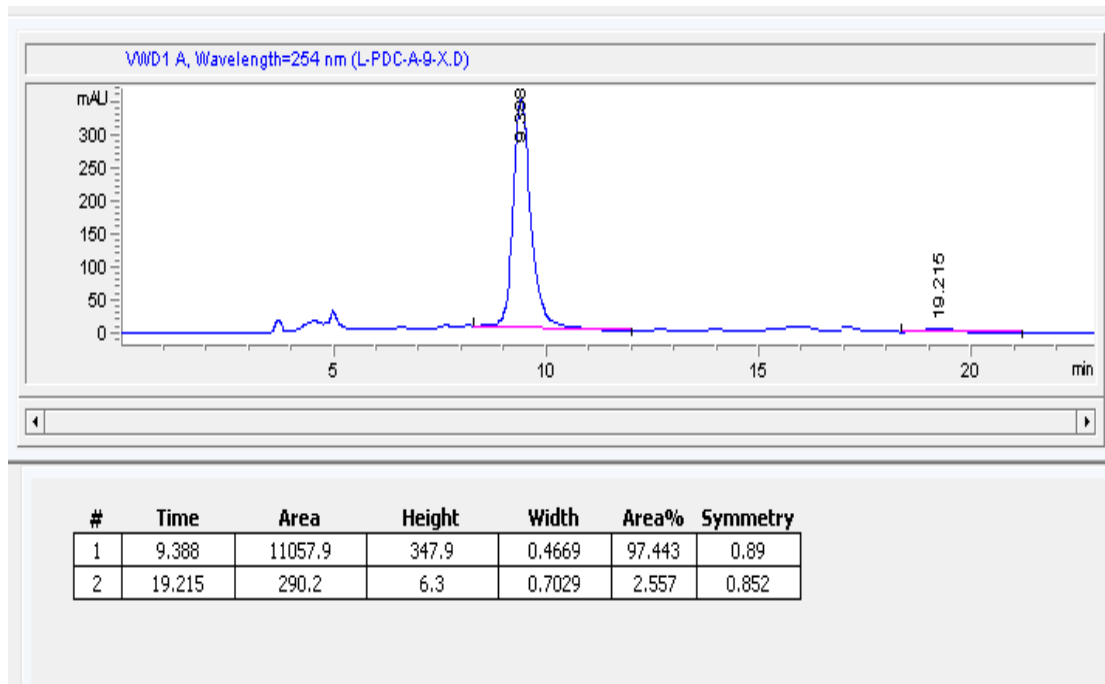

# $^1\text{H}$ and $^{13}\text{C}$ NMR of 6f

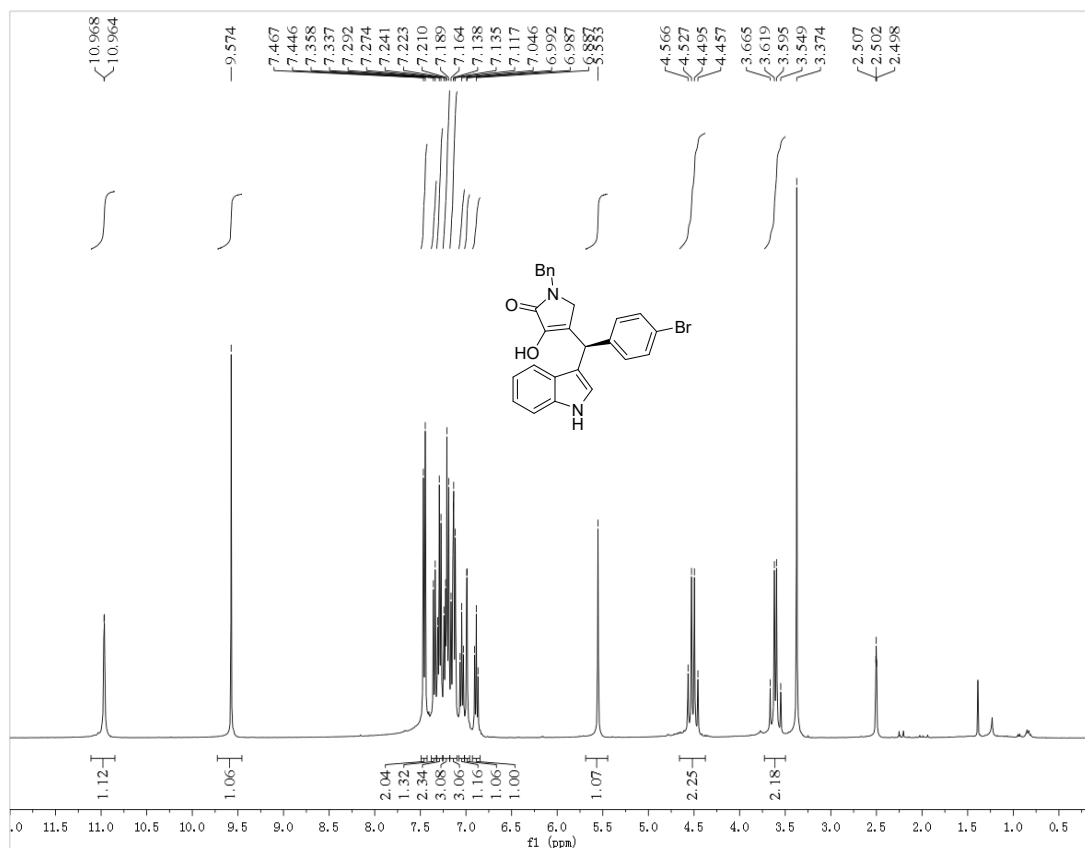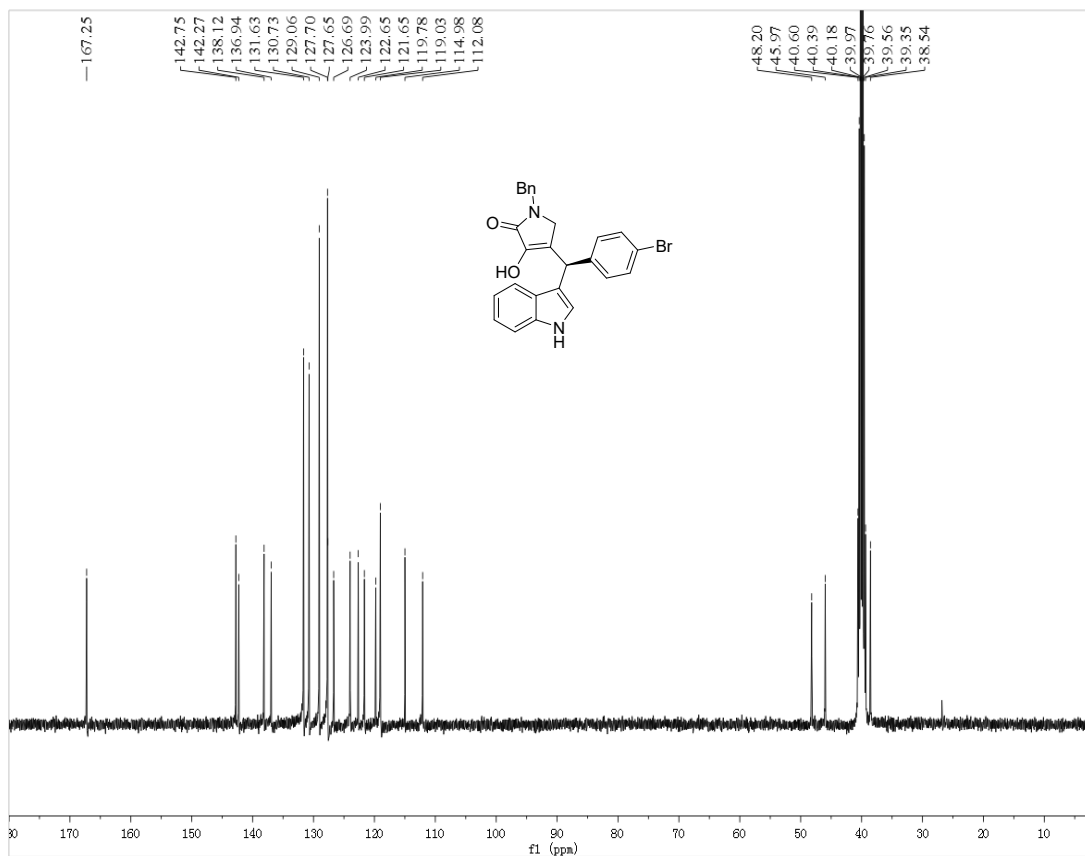



### HPLC of 6f

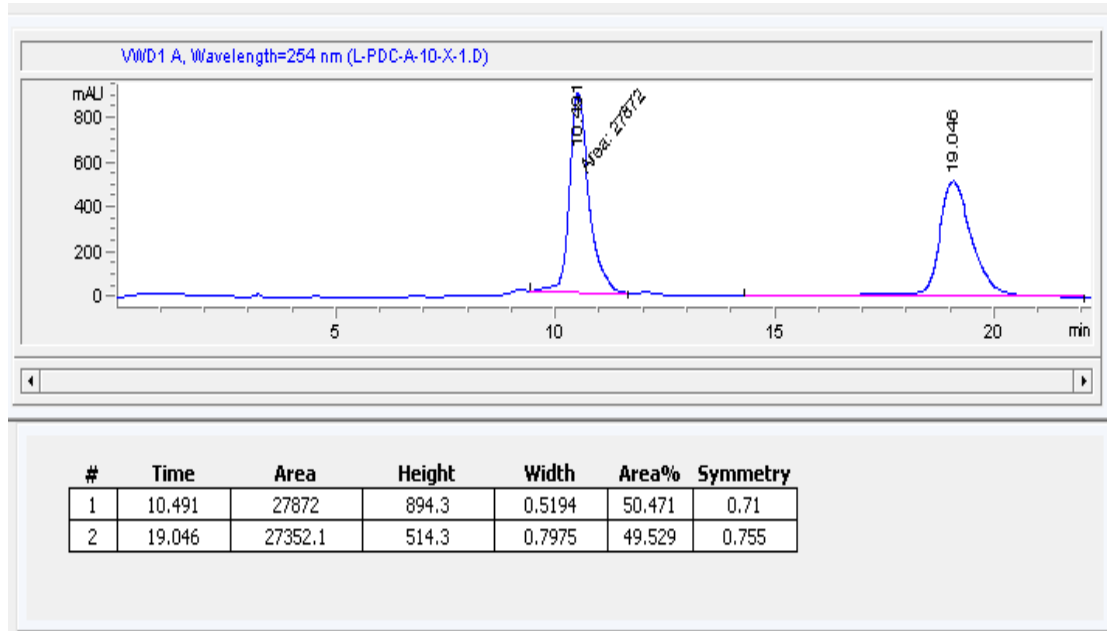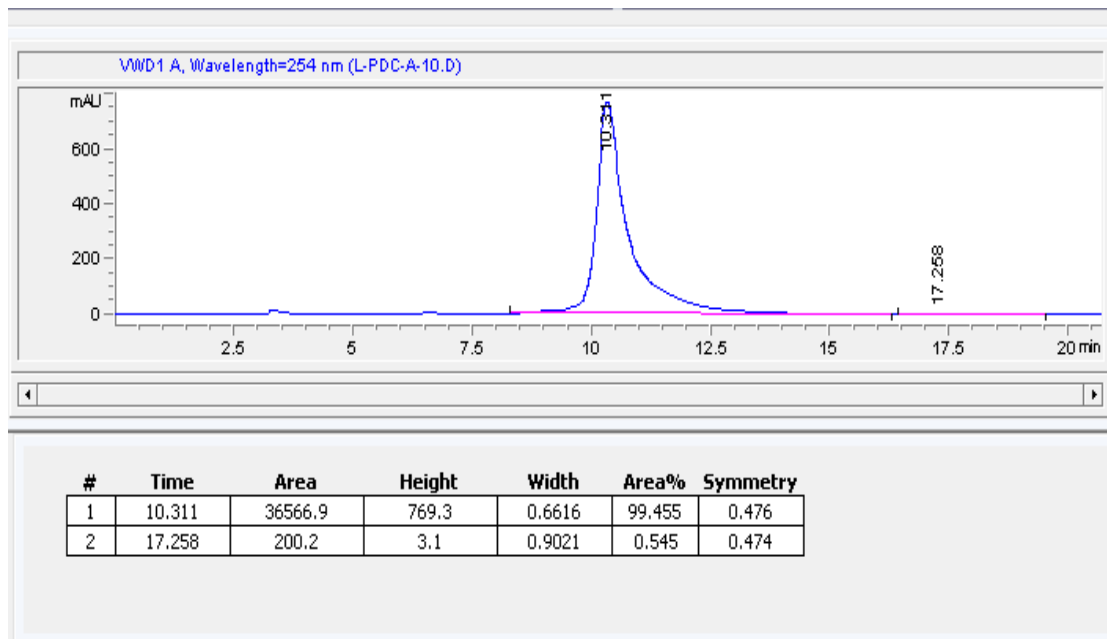

# <sup>1</sup>H and <sup>13</sup>C NMR of 6g

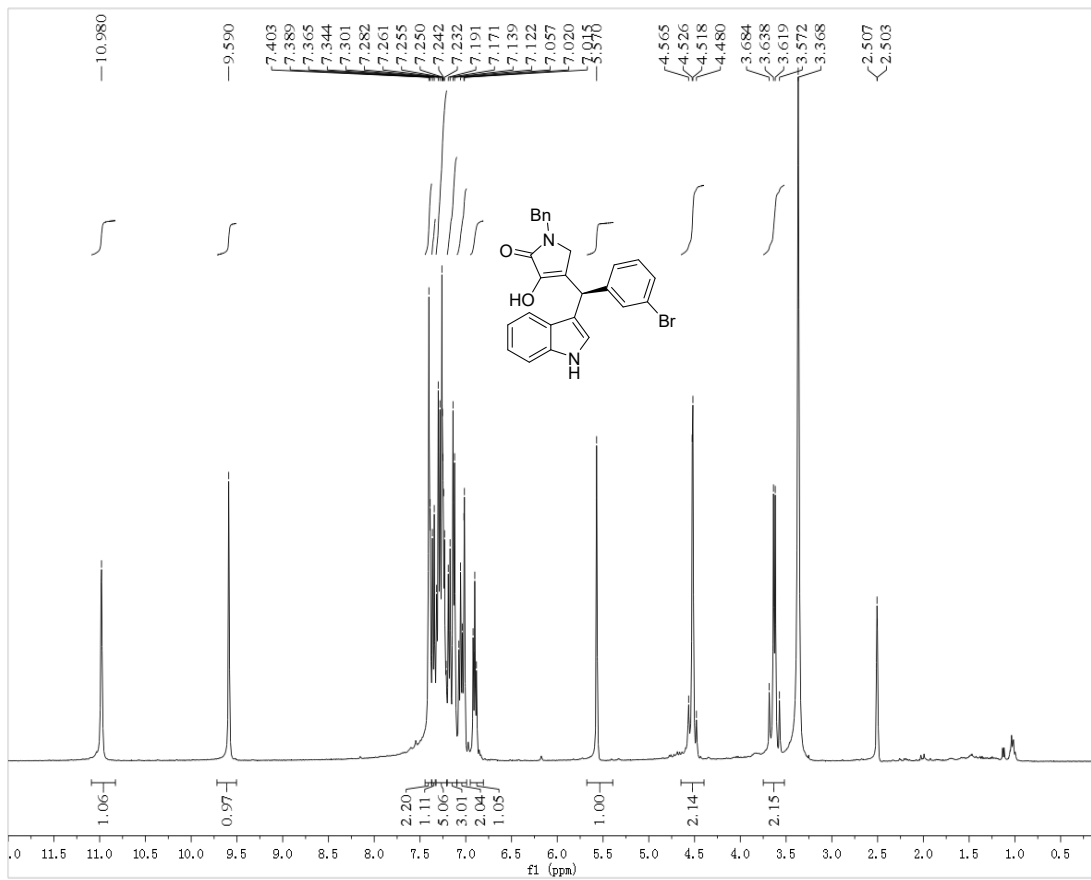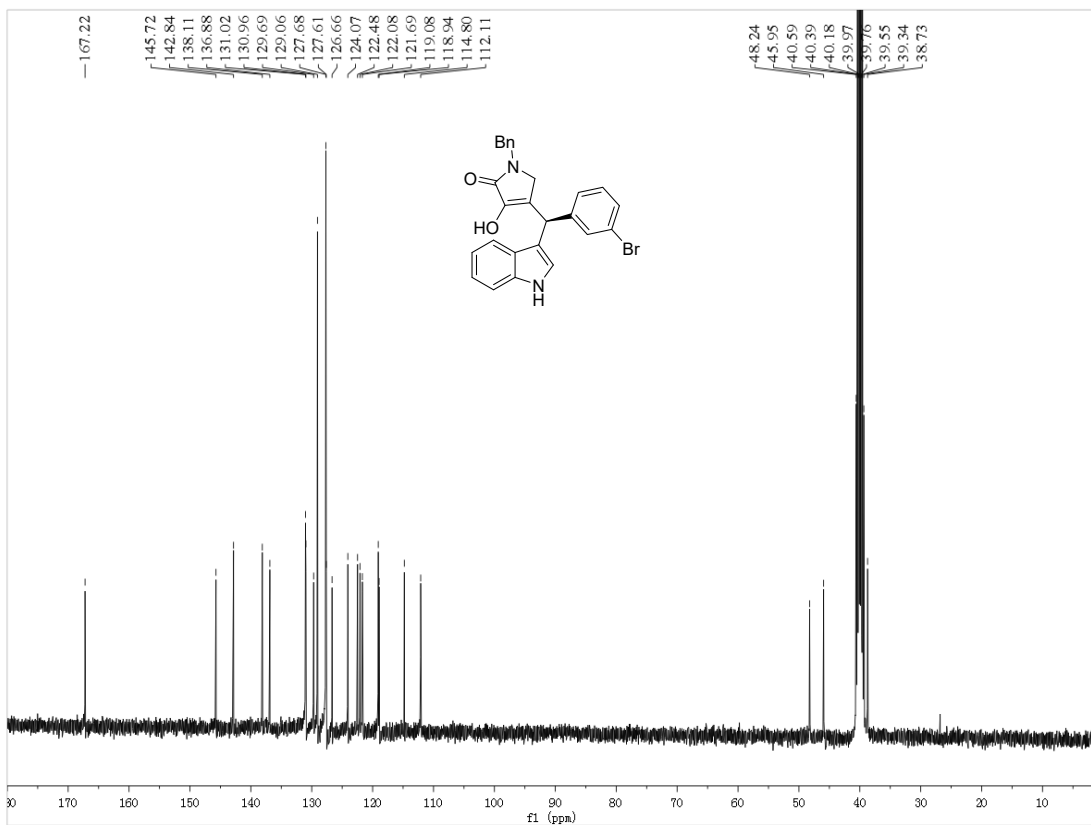

### HPLC of 6g

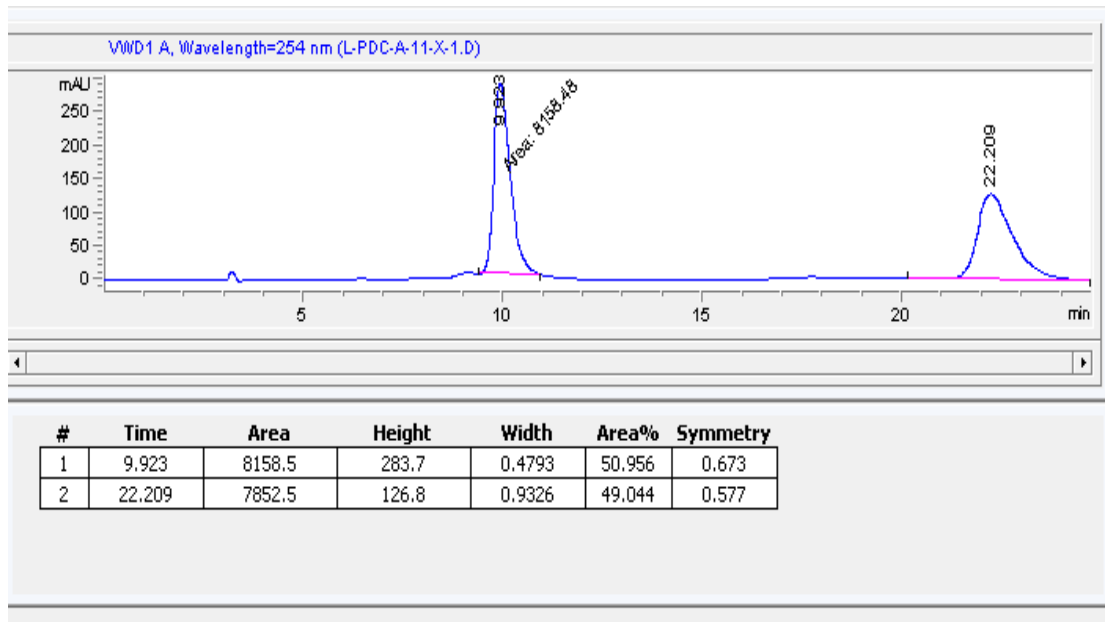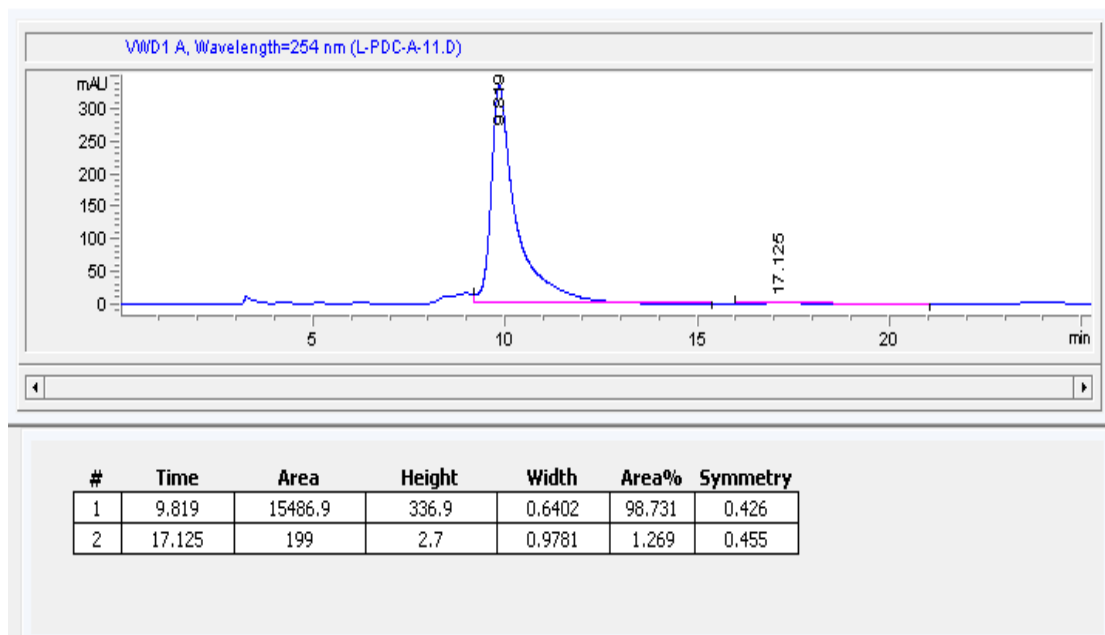

# <sup>1</sup>H and <sup>13</sup>C NMR of 6h

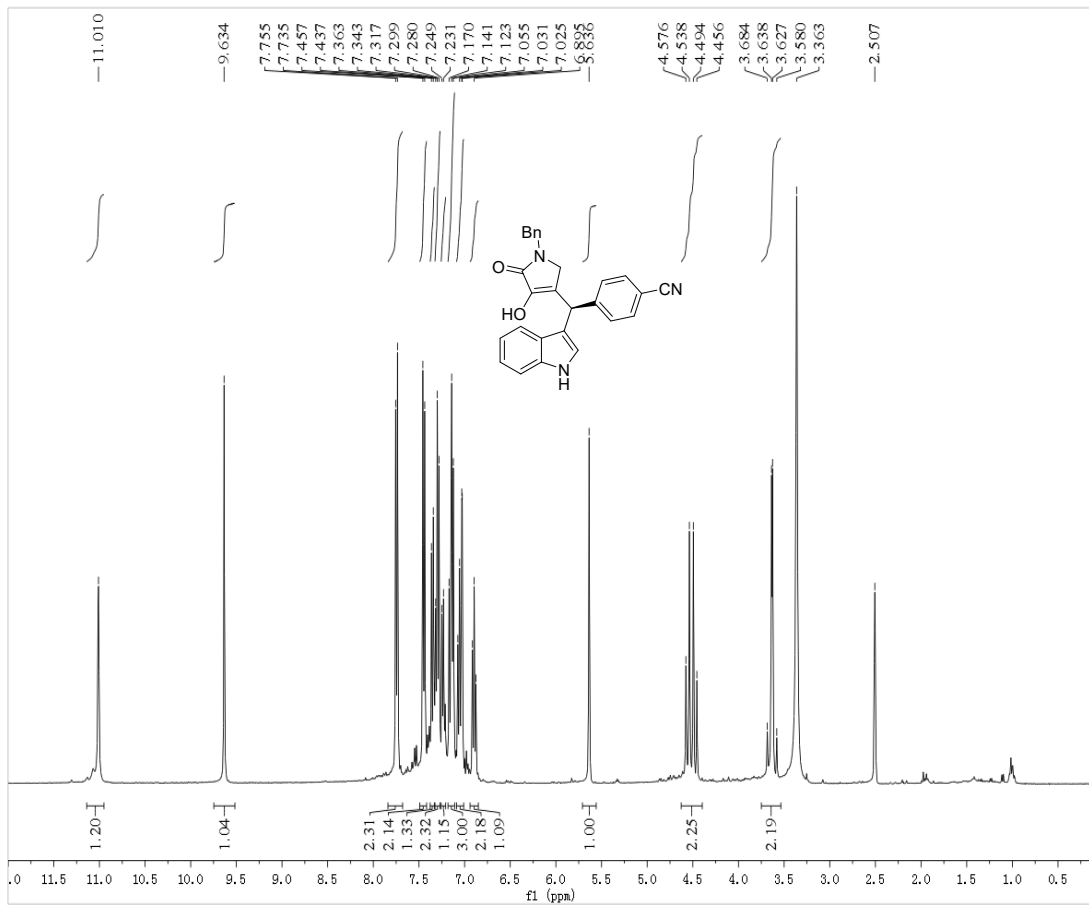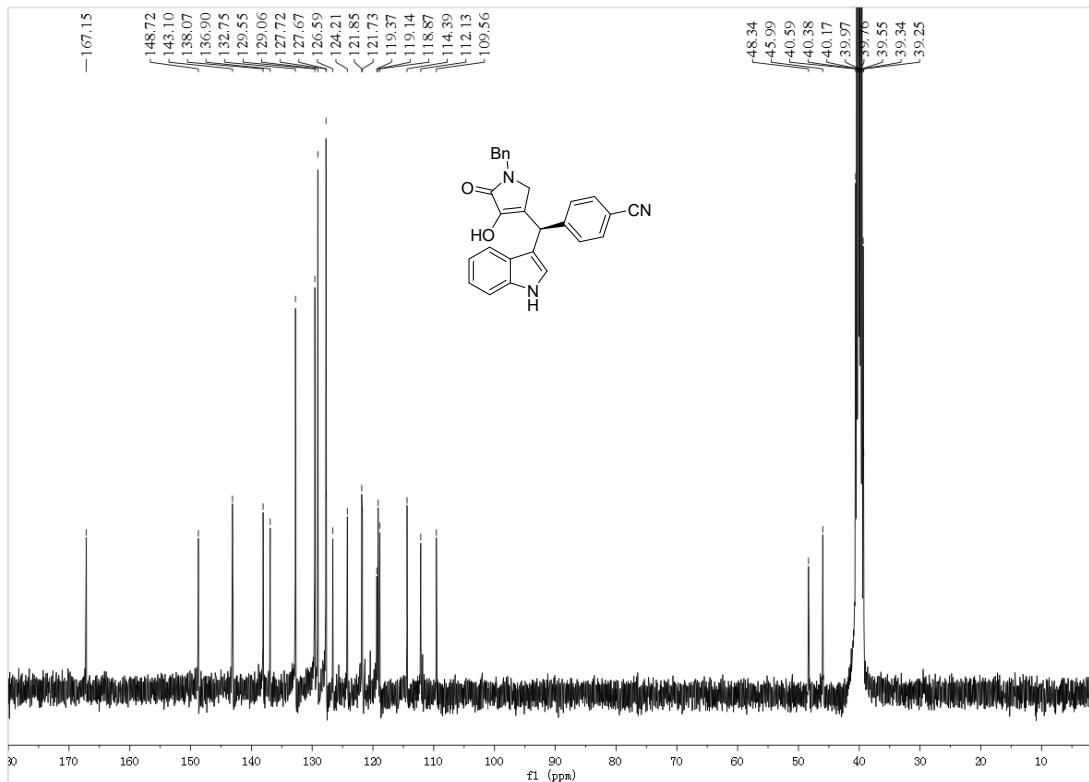

### HPLC of 6h

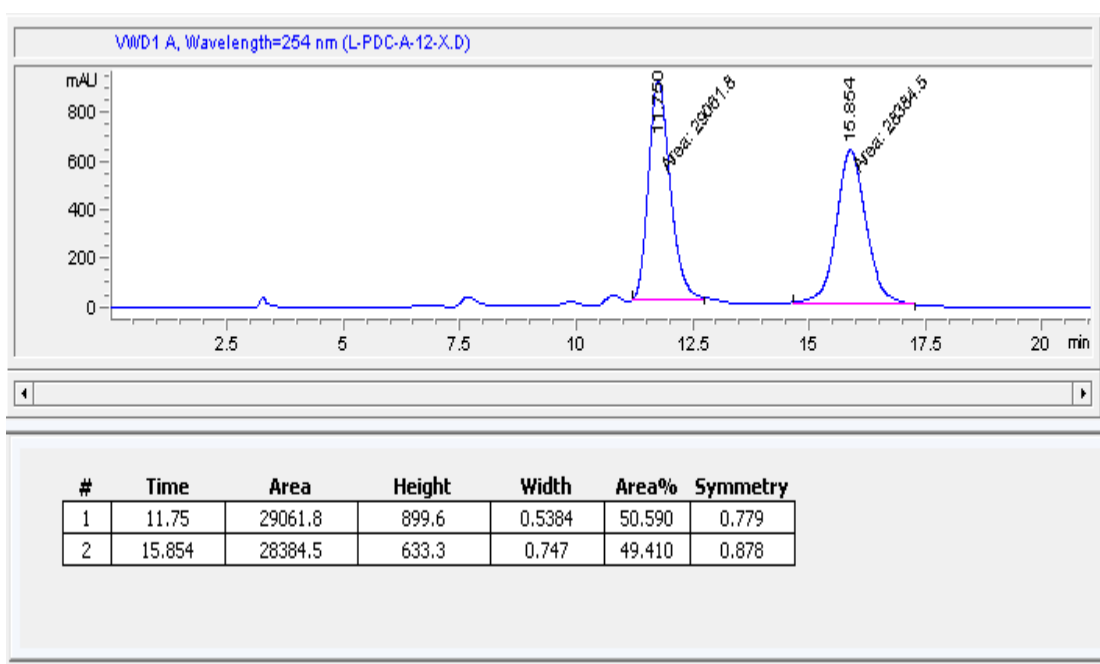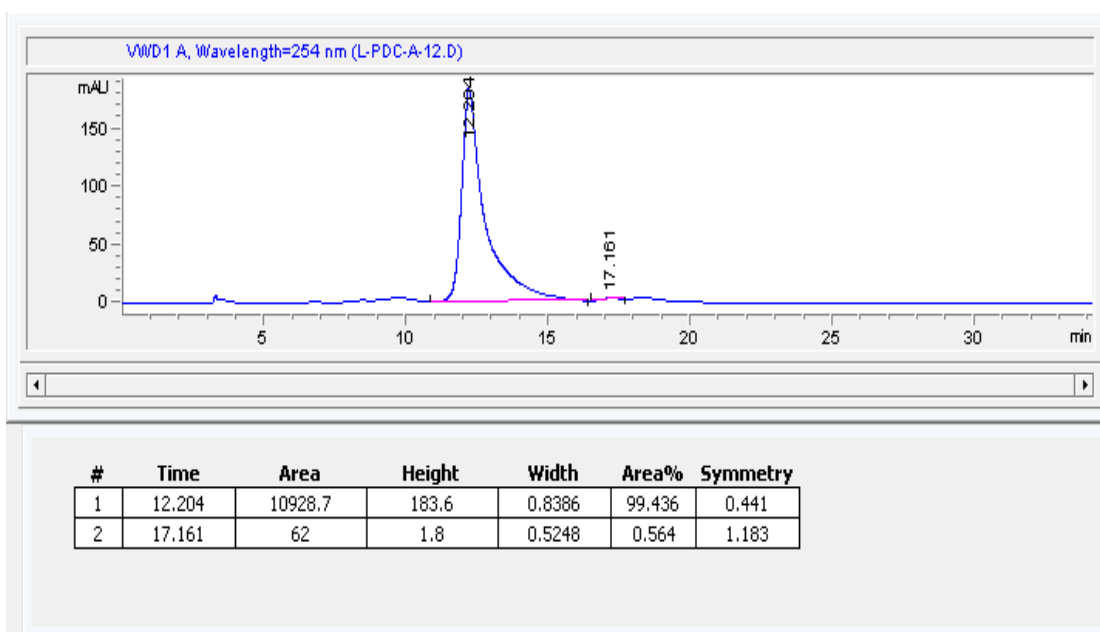

# <sup>1</sup>H and <sup>13</sup>C NMR of 6i

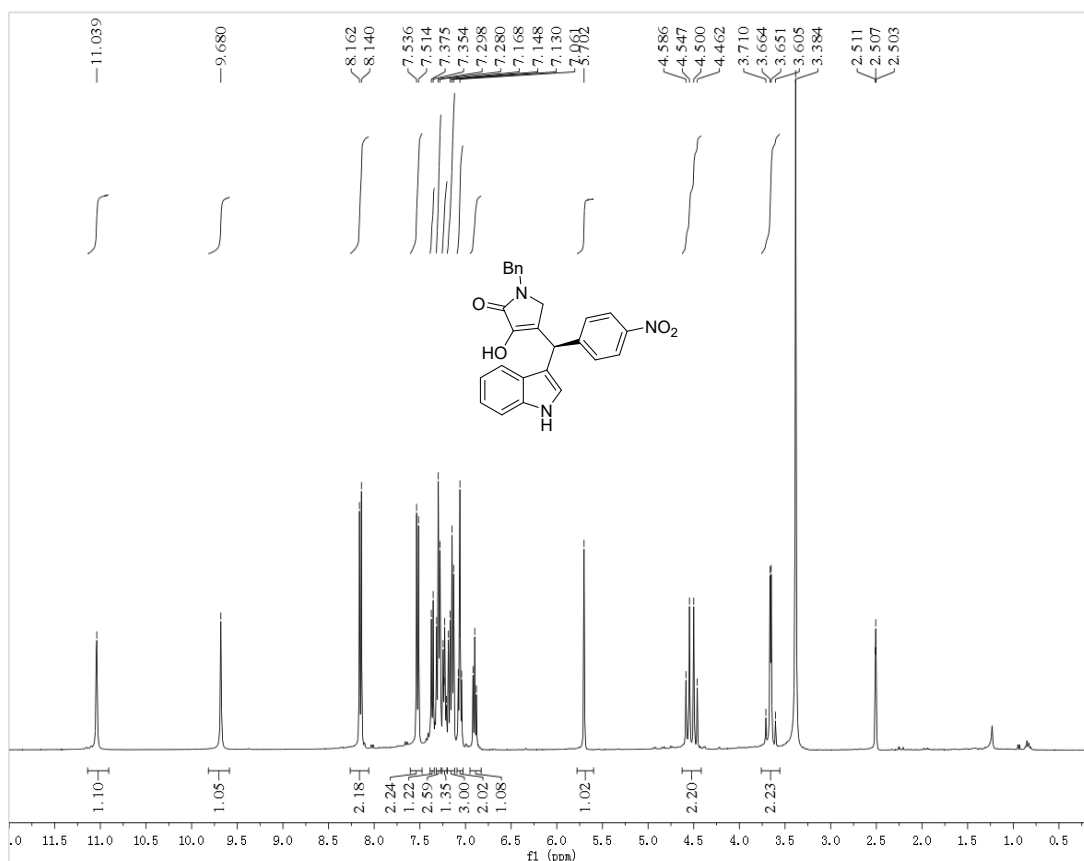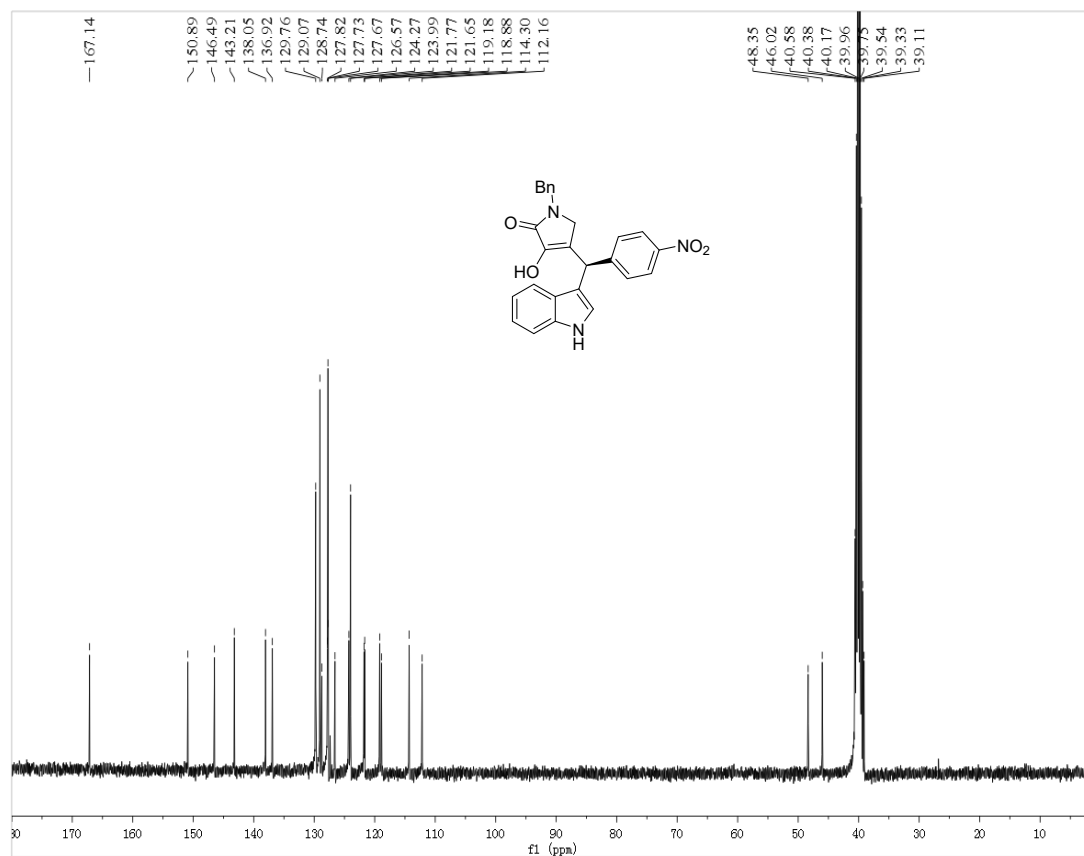

## HPLC of 6i

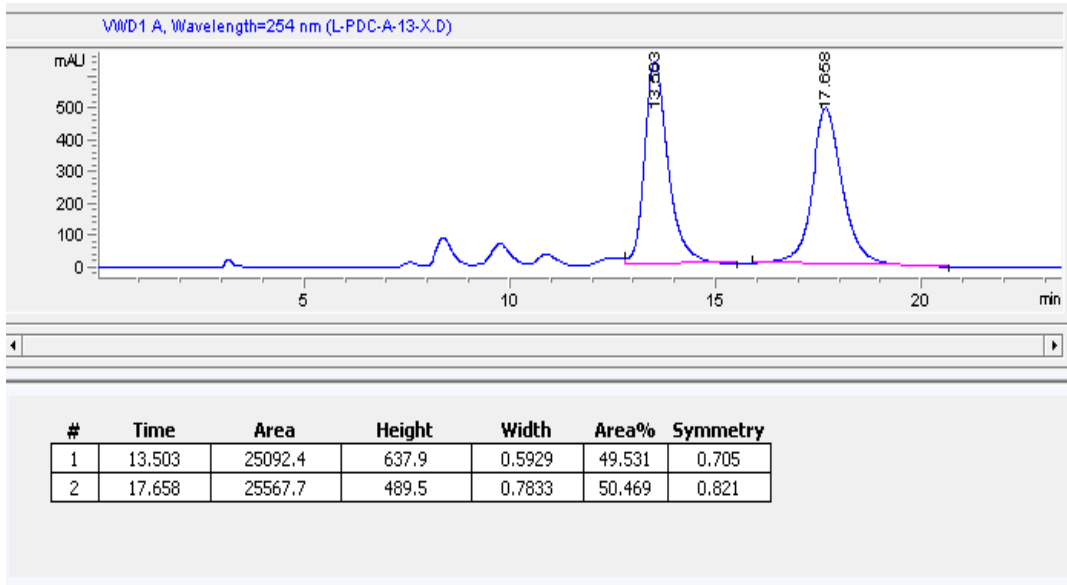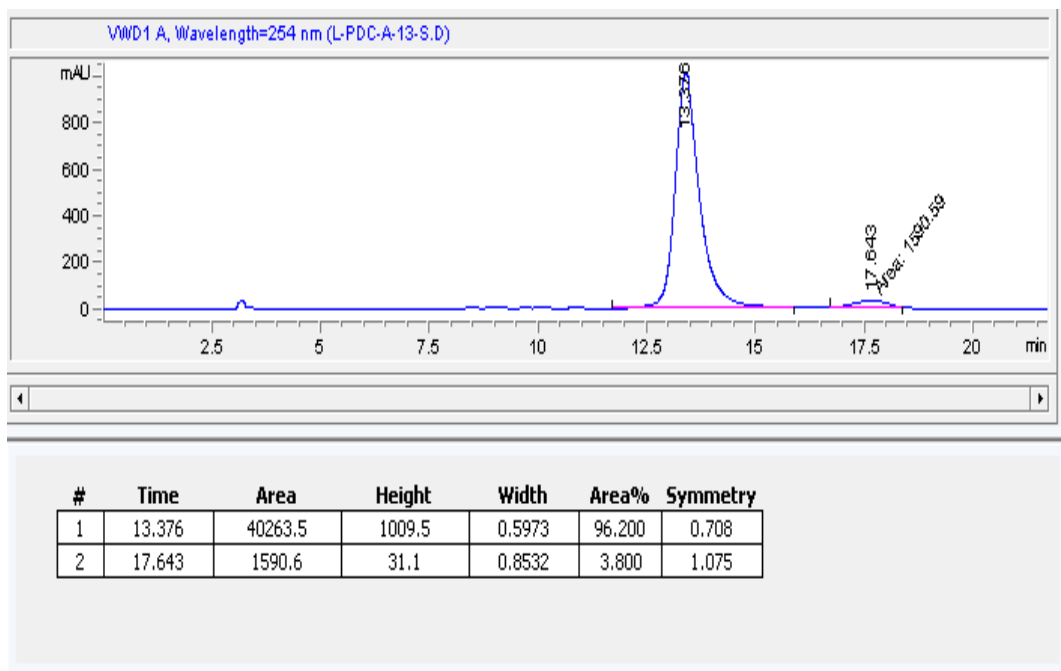

# <sup>1</sup>H and <sup>13</sup>C NMR of 6j

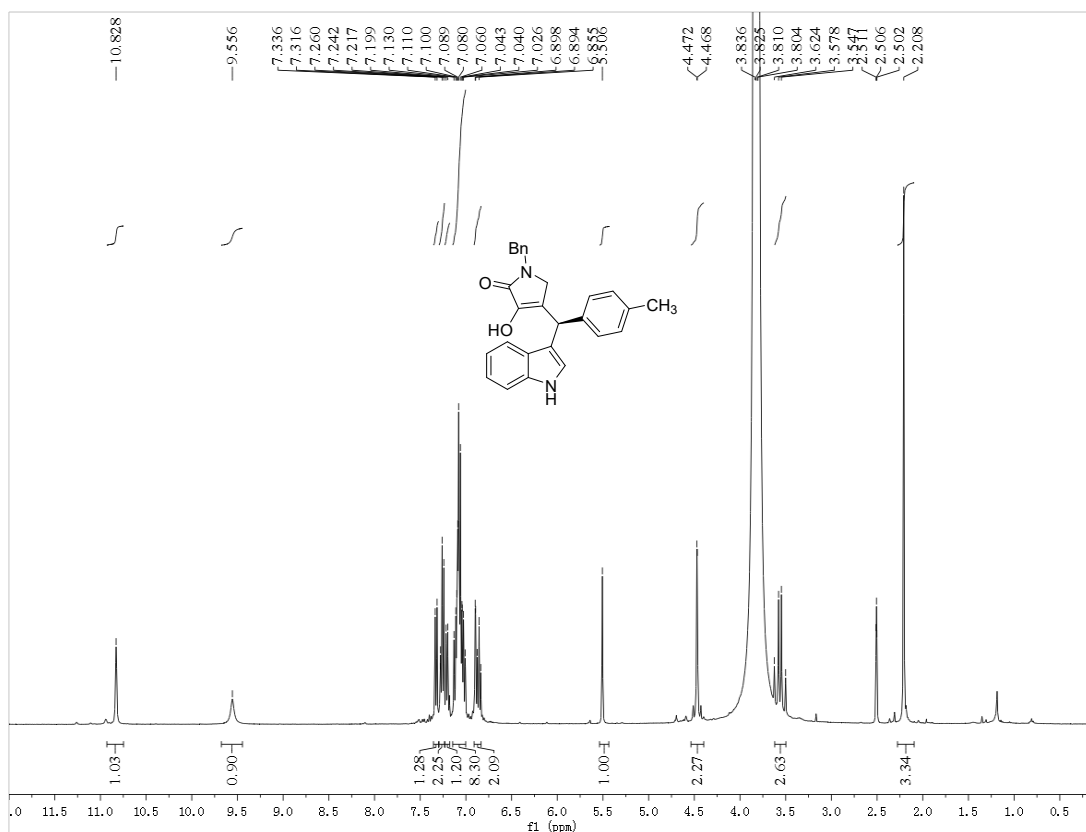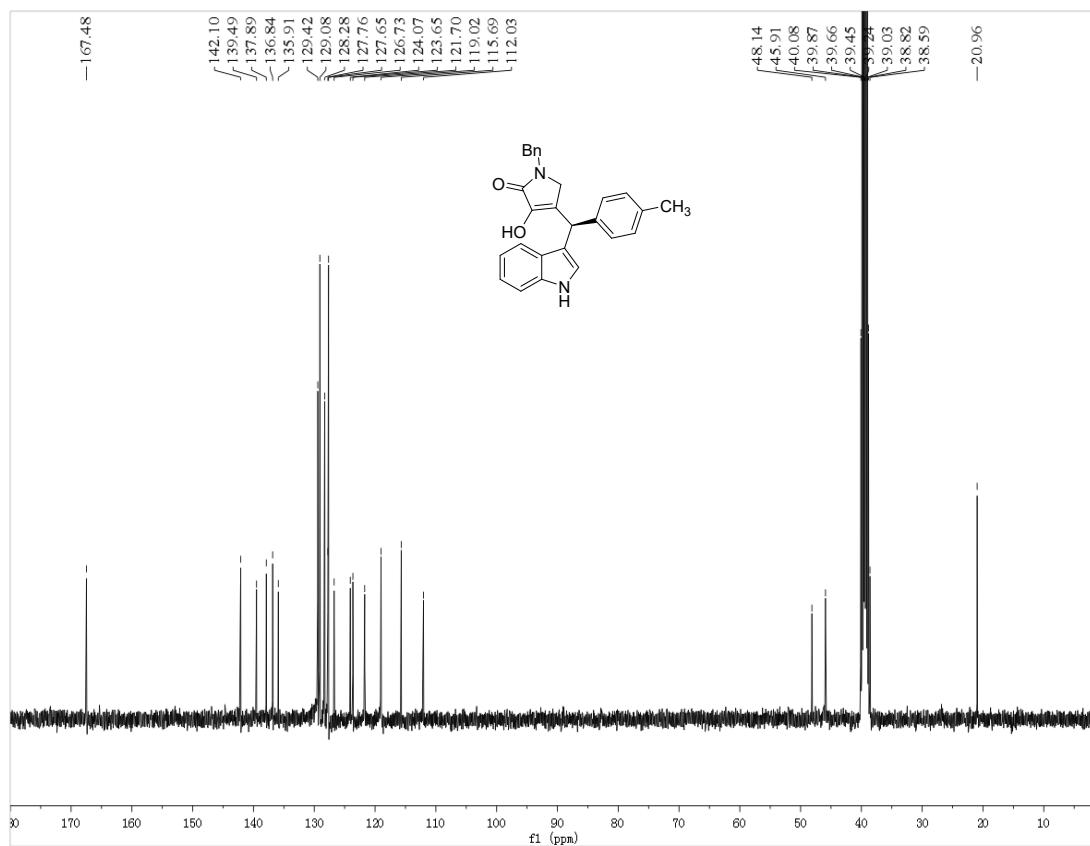



### HPLC of 6j

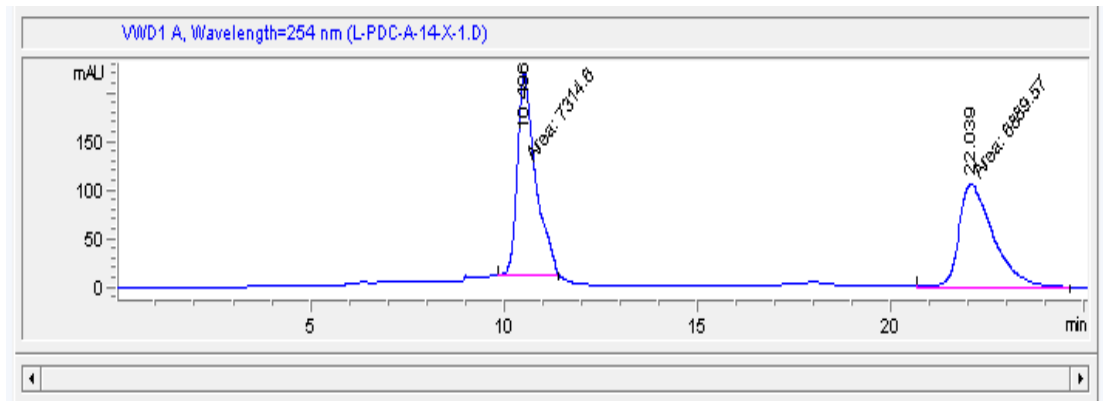

| # | Time   | Area   | Height | Width  | Area%  | Symmetry |
|---|--------|--------|--------|--------|--------|----------|
| 1 | 10.496 | 7314.6 | 209.5  | 0.5818 | 51.496 | 0.52     |
| 2 | 22.039 | 6889.6 | 107.4  | 1.0692 | 48.504 | 0.51     |

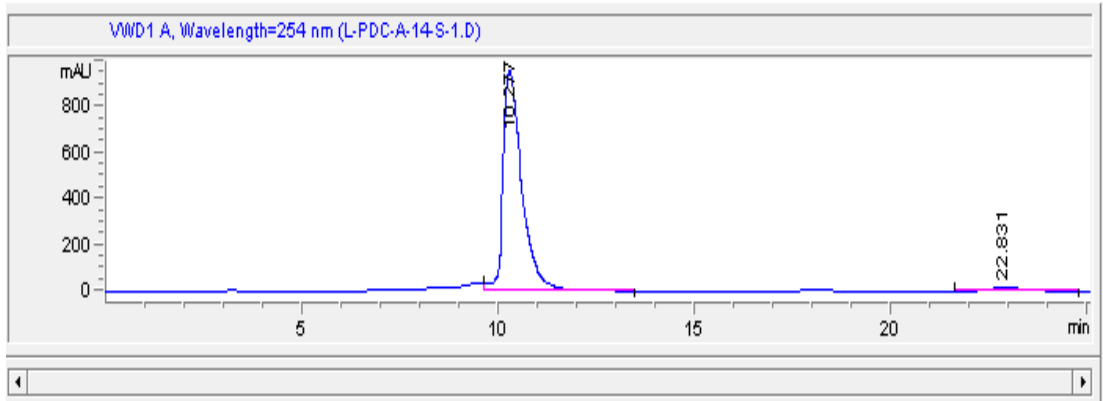

| # | Time   | Area    | Height | Width  | Area%  | Symmetry |
|---|--------|---------|--------|--------|--------|----------|
| 1 | 10.277 | 31315.5 | 952.6  | 0.4855 | 96.989 | 0.491    |
| 2 | 22.831 | 972.1   | 15.6   | 0.9334 | 3.011  | 0.66     |

# <sup>1</sup>H and <sup>13</sup>C NMR of 6k

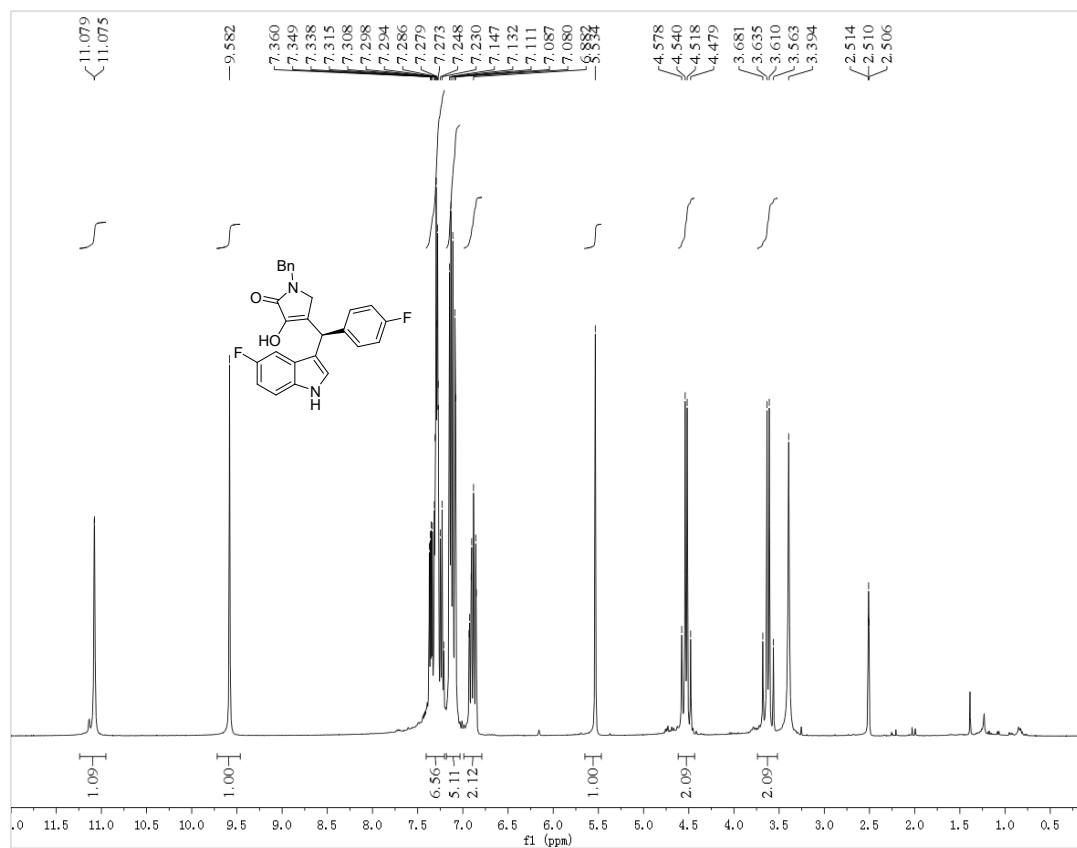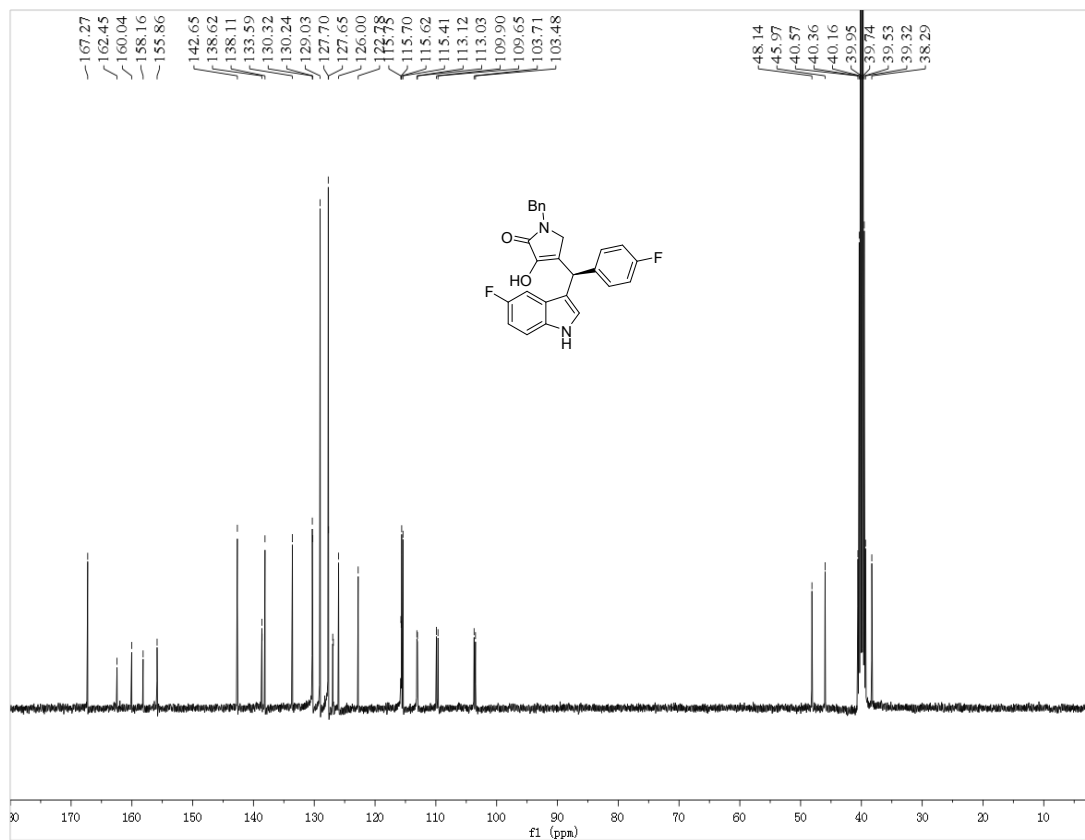

### HPLC of 6k

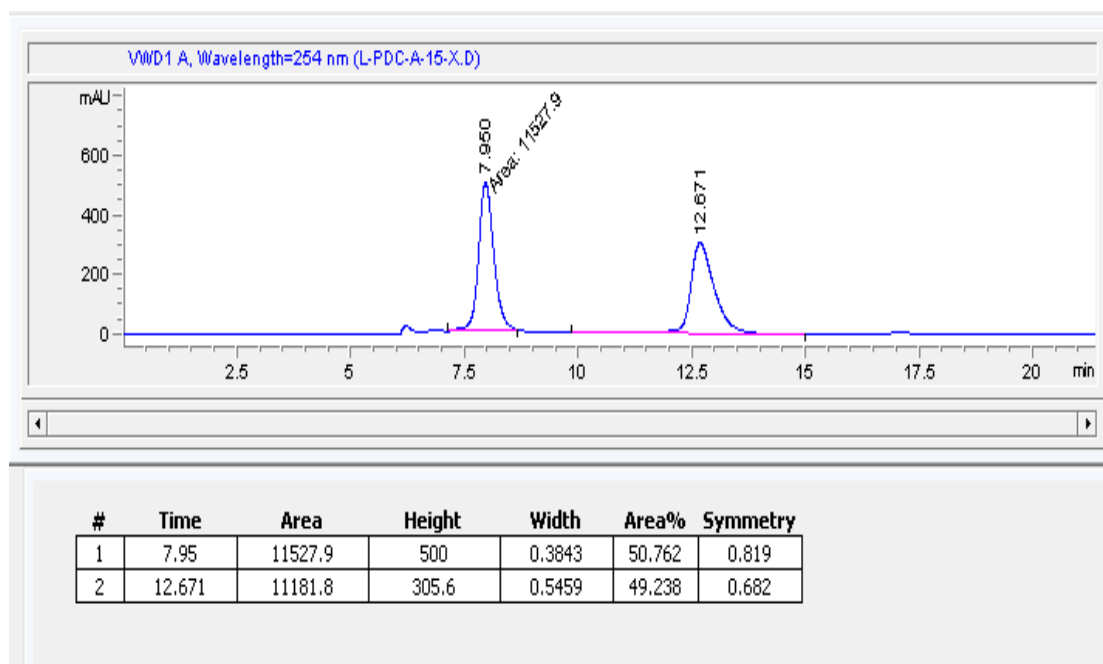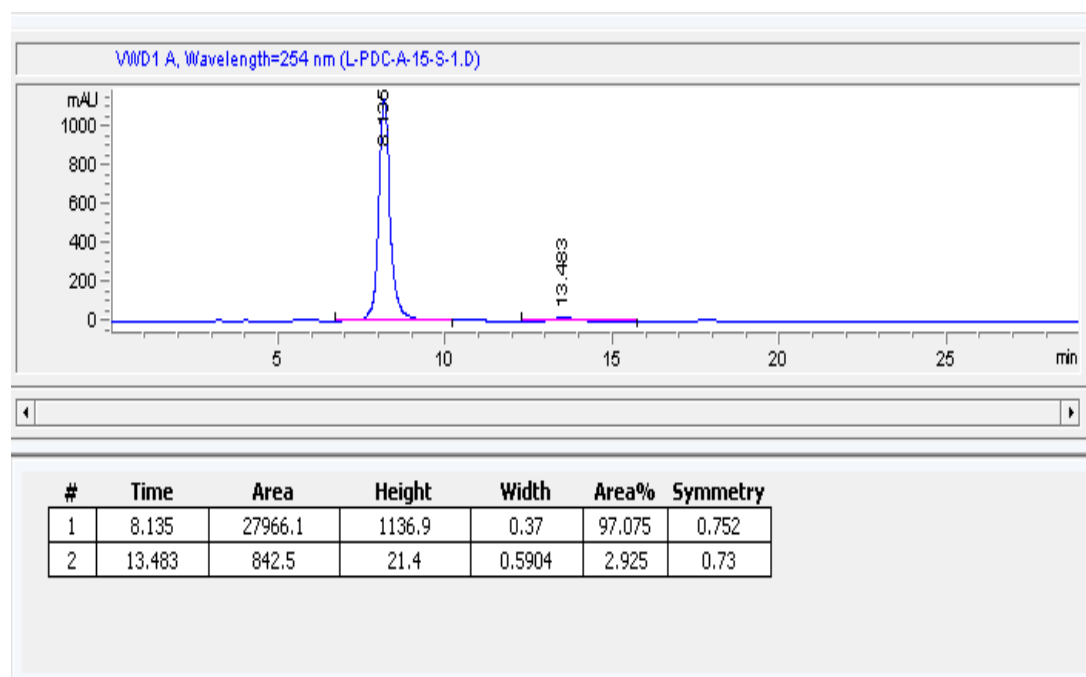

# $^1\text{H}$ and $^{13}\text{C}$ NMR of 6l

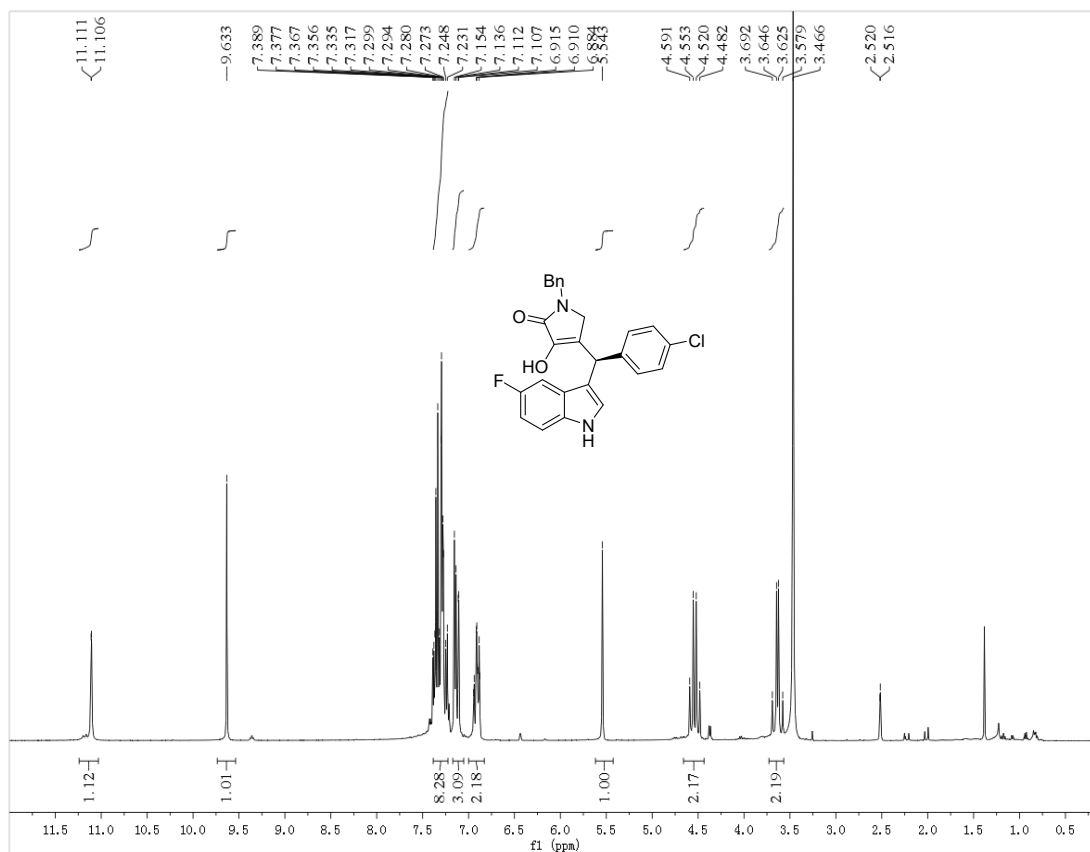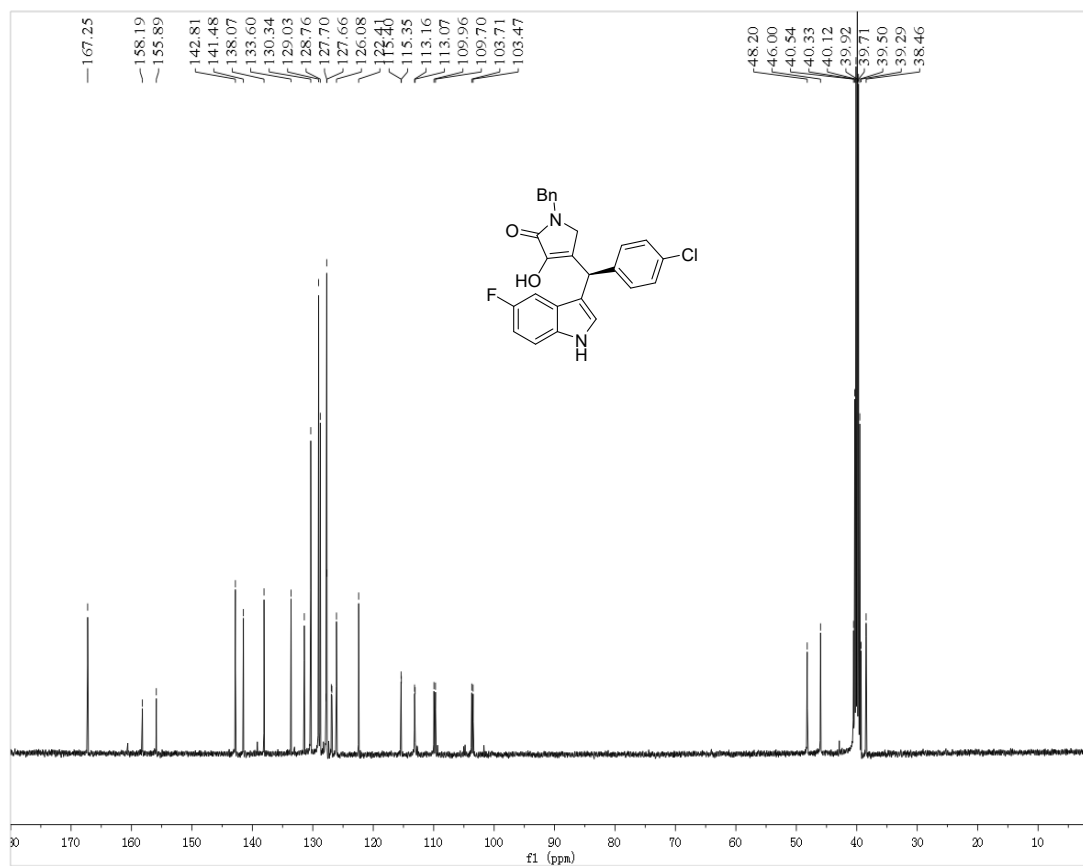

## HPLC of 6l

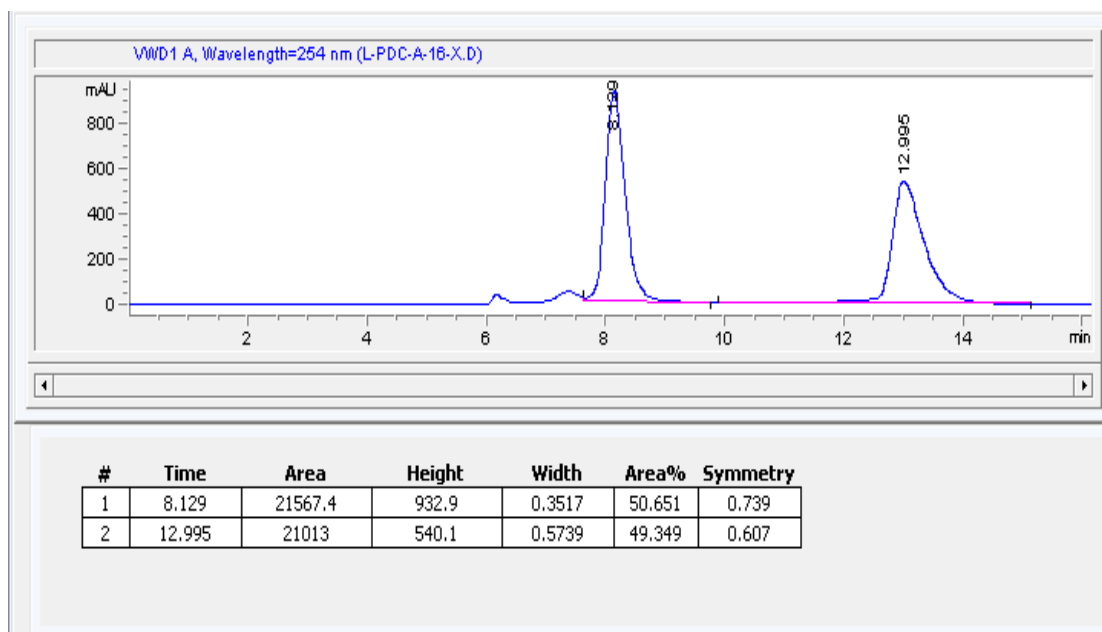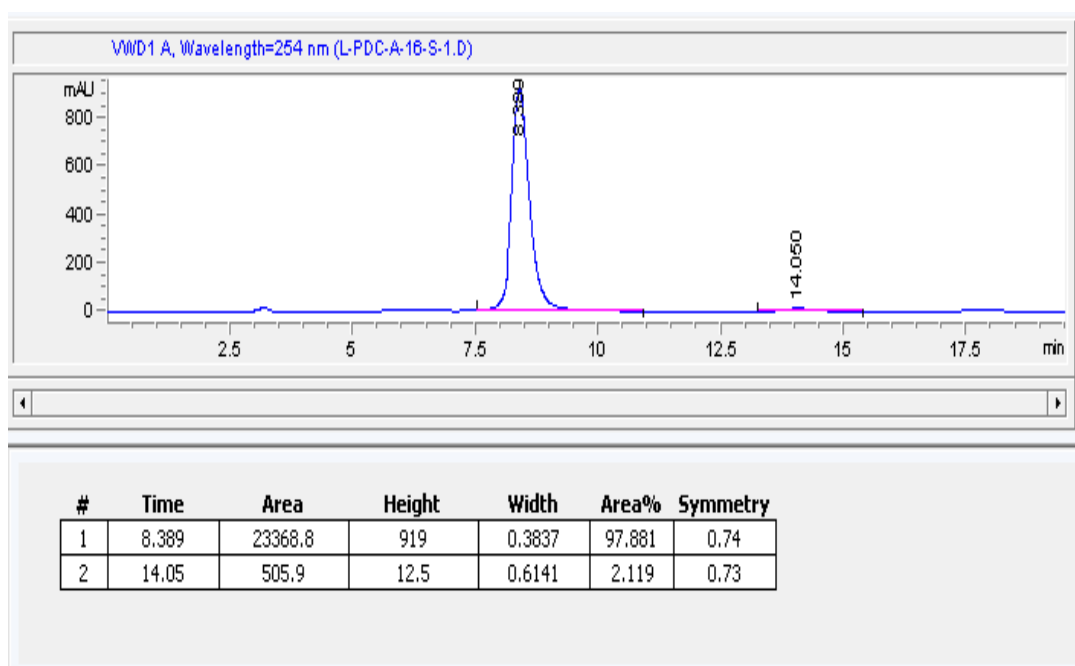

# <sup>1</sup>H and <sup>13</sup>C NMR of 6m

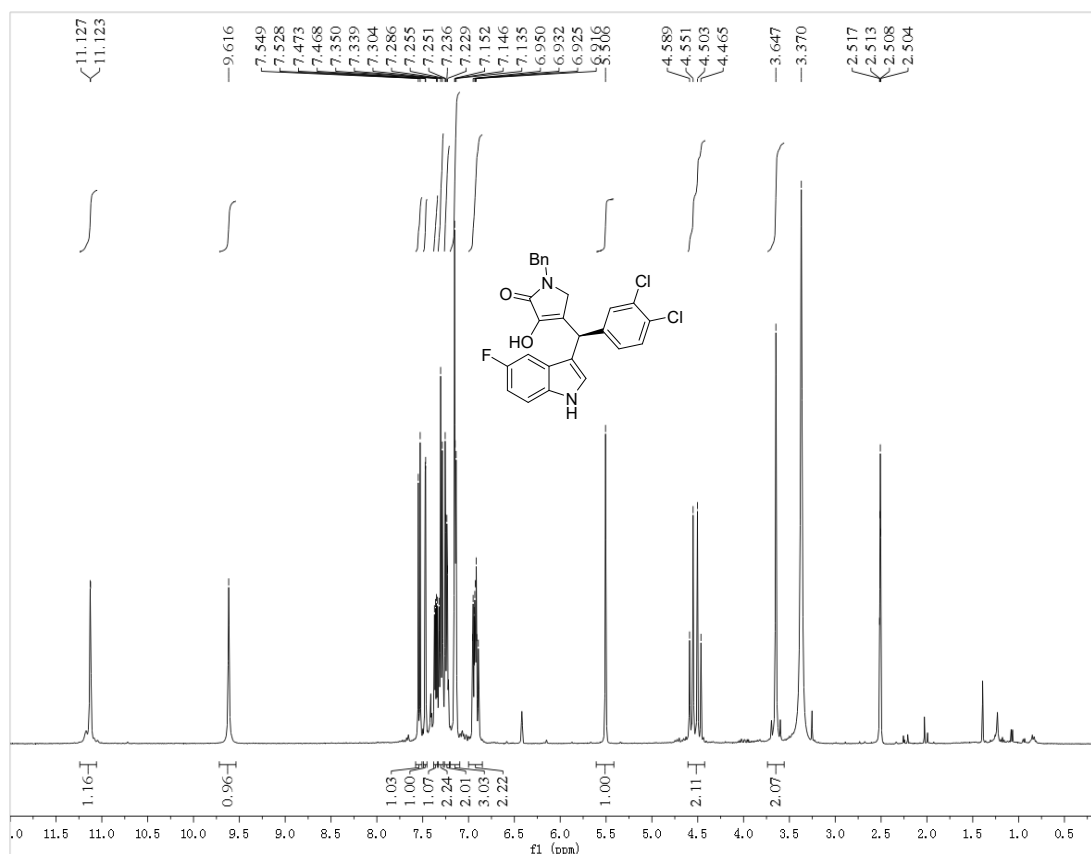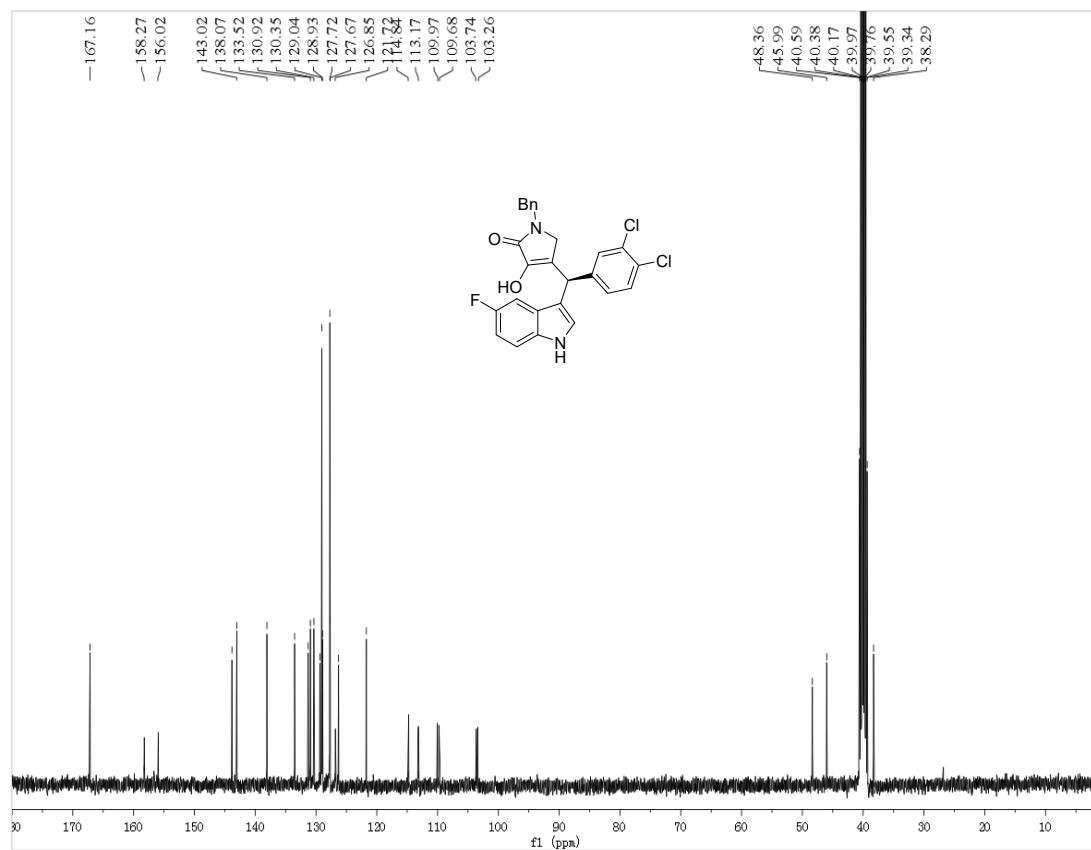

### HPLC of 6m

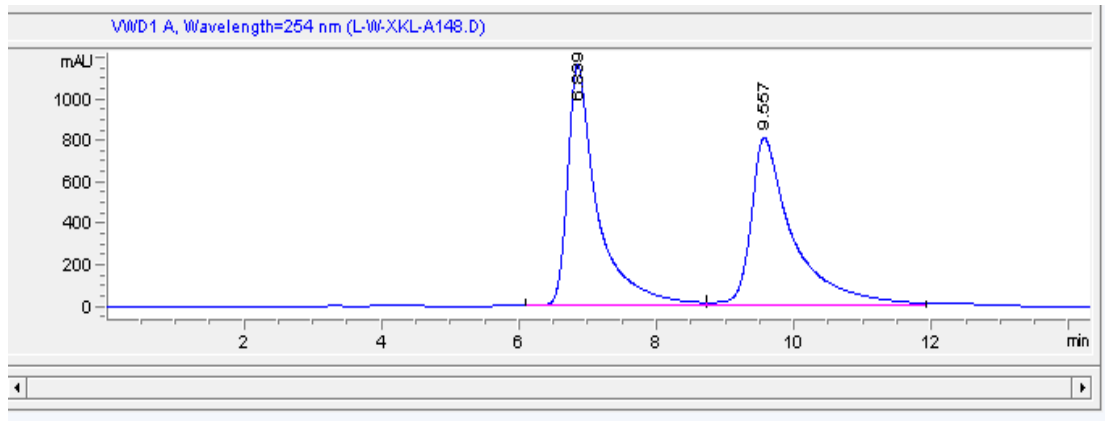

| # | Time  | Area    | Height | Width  | Area%  | Symmetry |
|---|-------|---------|--------|--------|--------|----------|
| 1 | 6.839 | 35691.9 | 1169.8 | 0.429  | 50.104 | 0.447    |
| 2 | 9.557 | 35543.3 | 815.1  | 0.6048 | 49.896 | 0.417    |

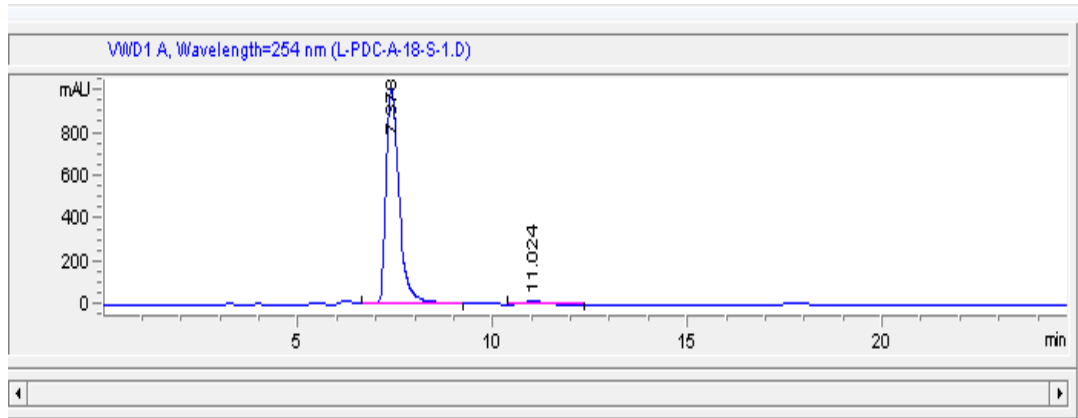

| # | Time   | Area    | Height | Width  | Area%  | Symmetry |
|---|--------|---------|--------|--------|--------|----------|
| 1 | 7.378  | 22873.1 | 1000.9 | 0.3426 | 97.978 | 0.597    |
| 2 | 11.024 | 472     | 14.5   | 0.4961 | 2.022  | 0.779    |

# $^1\text{H}$ and $^{13}\text{C}$ NMR of 6n

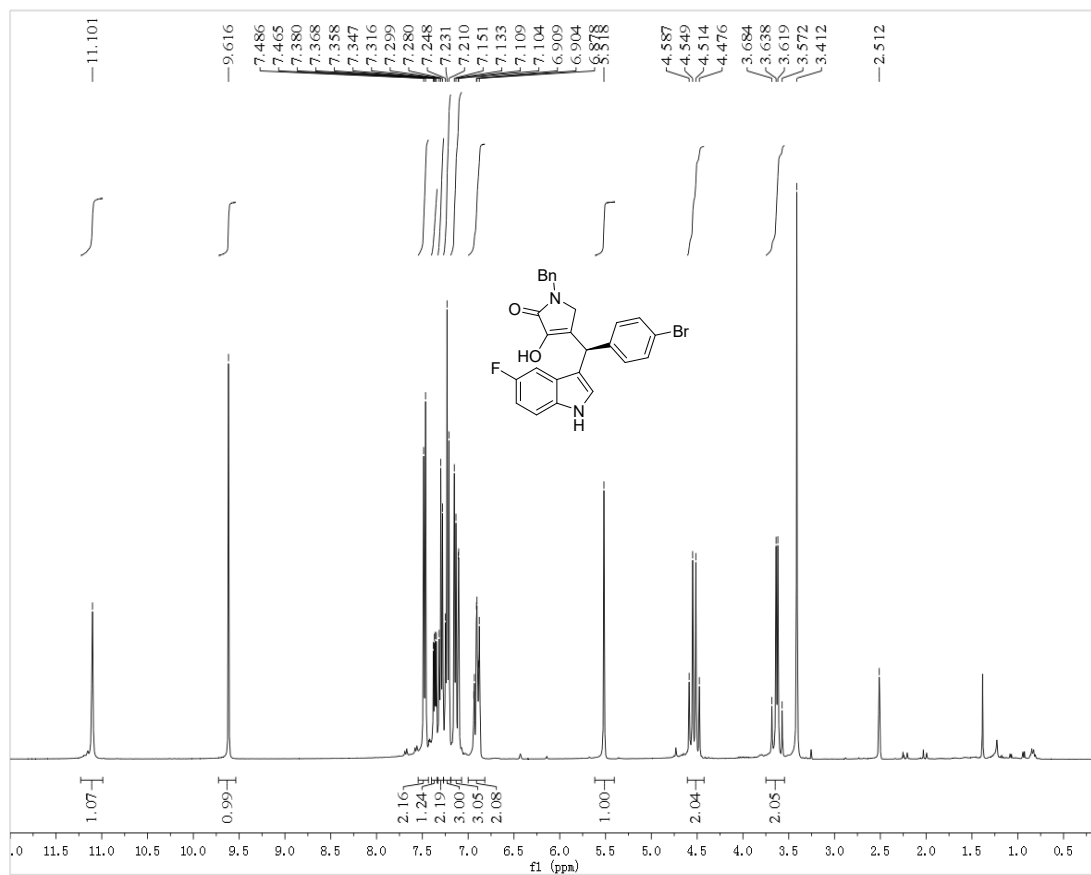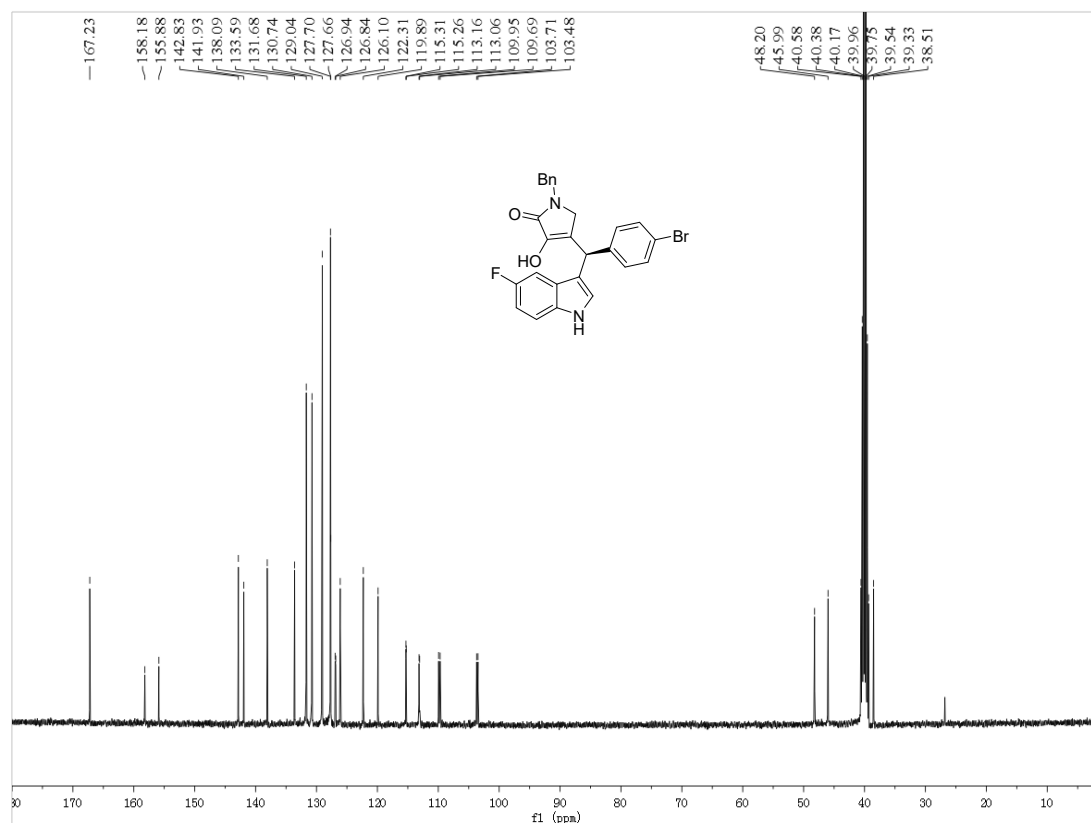



## HPLC of 6n

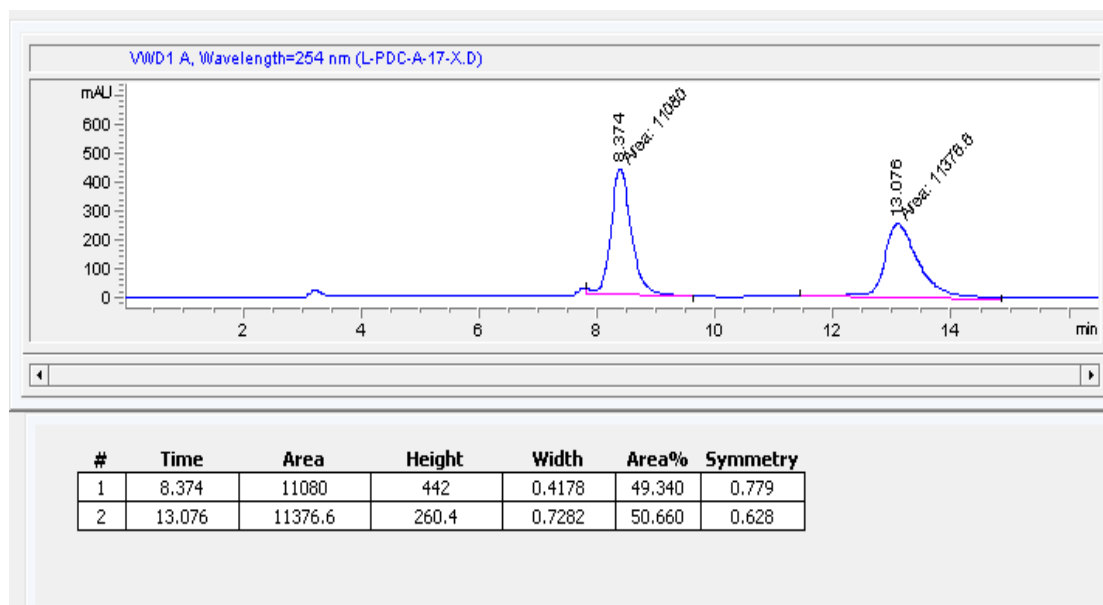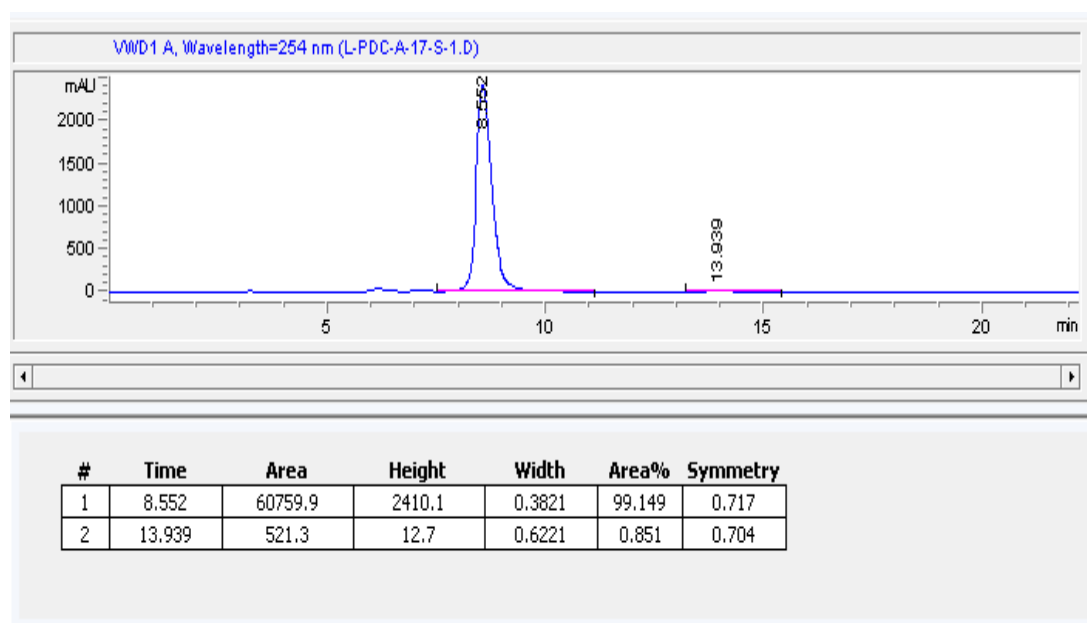

# $^1\text{H}$ and $^{13}\text{C}$ NMR of 60

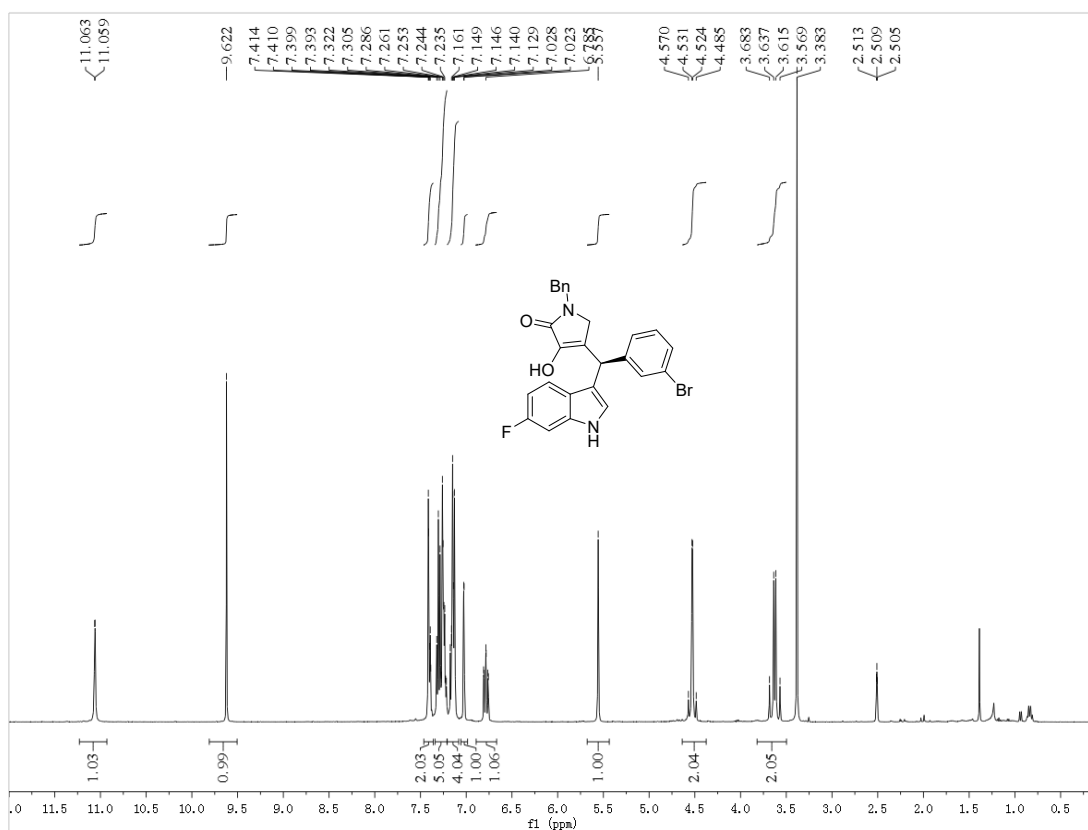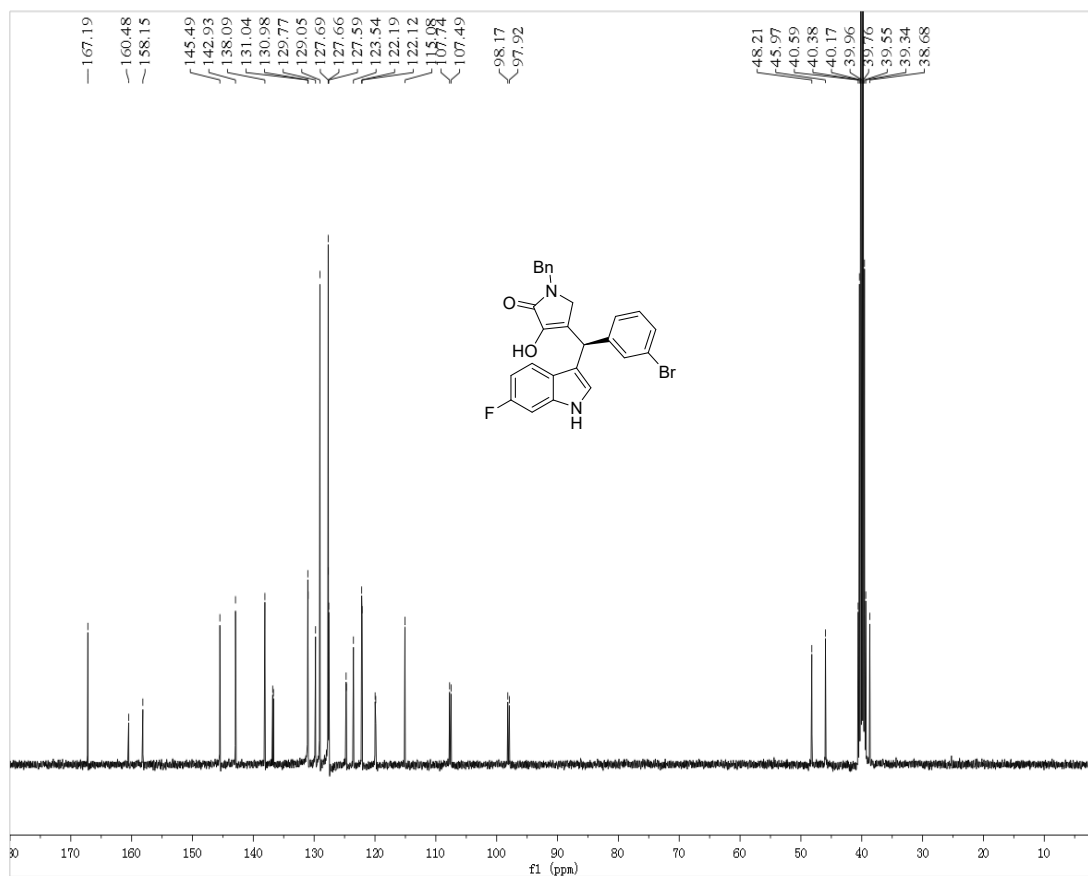

### HPLC of 6o

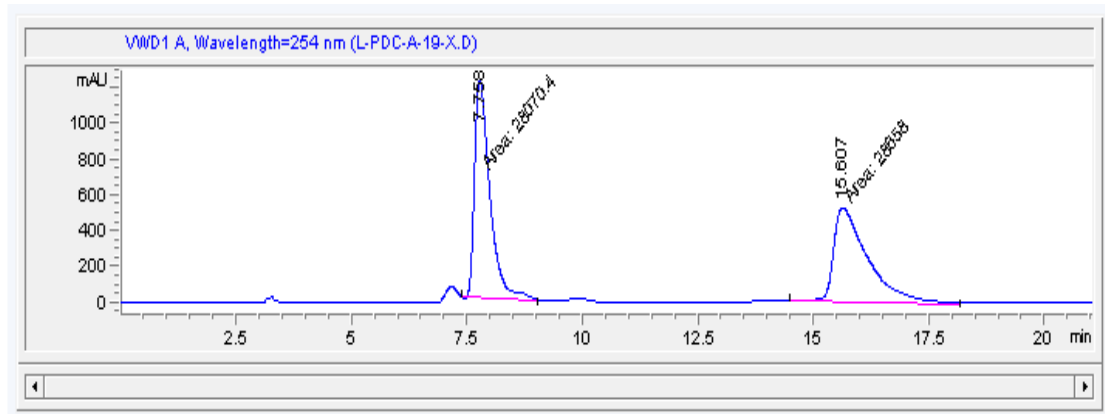

| # | Time   | Area    | Height | Width  | Area%  | Symmetry |
|---|--------|---------|--------|--------|--------|----------|
| 1 | 7.758  | 28070.4 | 1213.2 | 0.3856 | 49.482 | 0.494    |
| 2 | 15.607 | 28658   | 530.9  | 0.8997 | 50.518 | 0.364    |

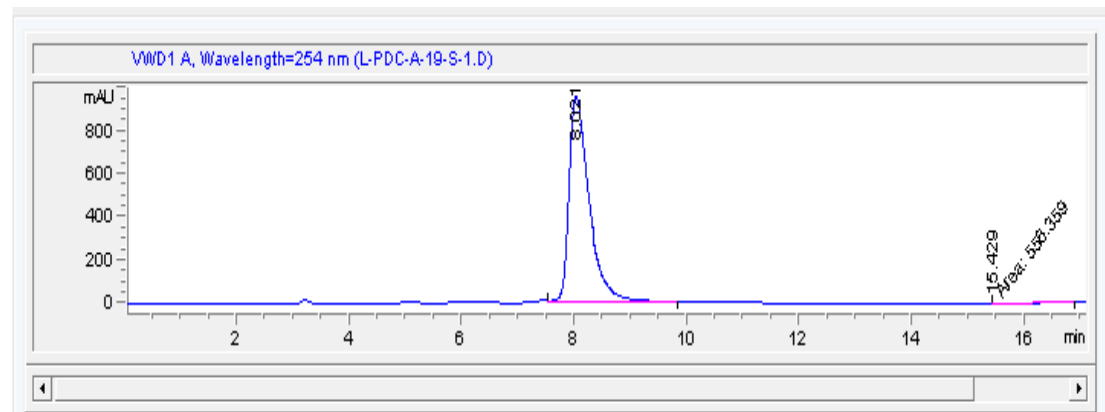

| # | Time   | Area    | Height | Width  | Area%  | Symmetry |
|---|--------|---------|--------|--------|--------|----------|
| 1 | 8.021  | 23984.9 | 955.9  | 0.3727 | 97.733 | 0.486    |
| 2 | 15.429 | 556.4   | 8.7    | 1.0649 | 2.267  | 0        |

**<sup>1</sup>H and <sup>13</sup>C NMR of 6p**

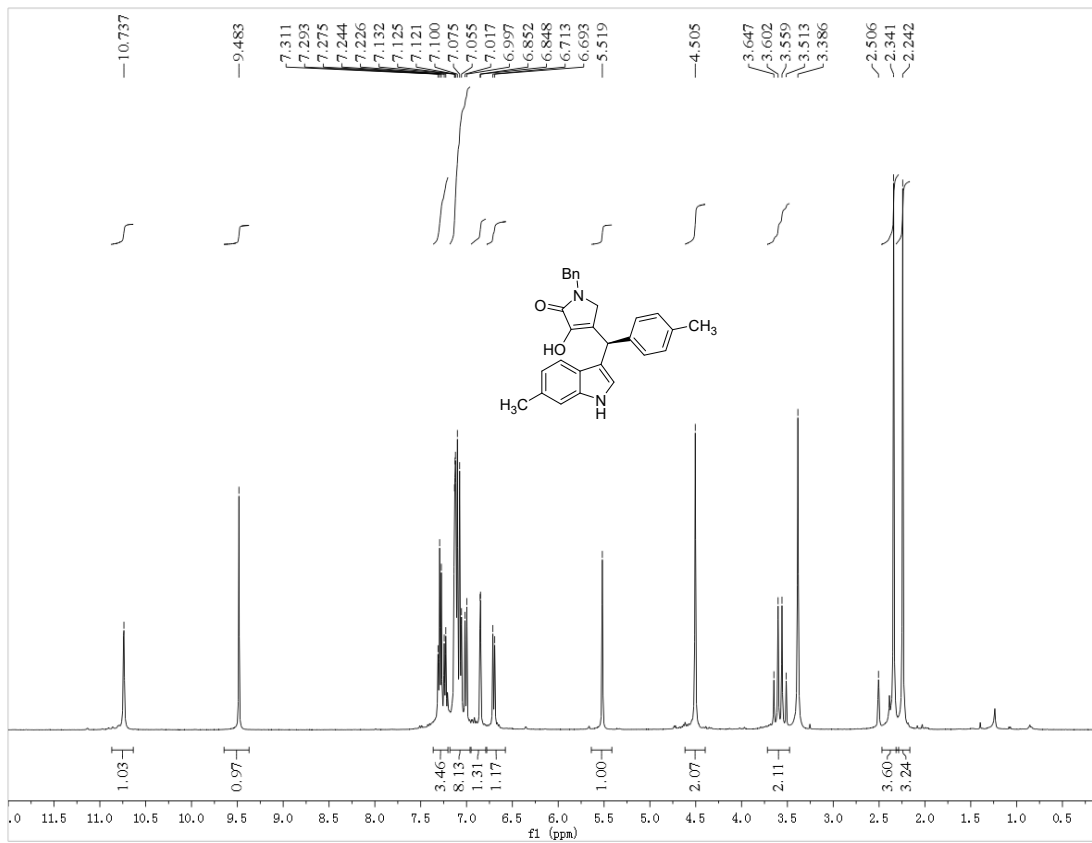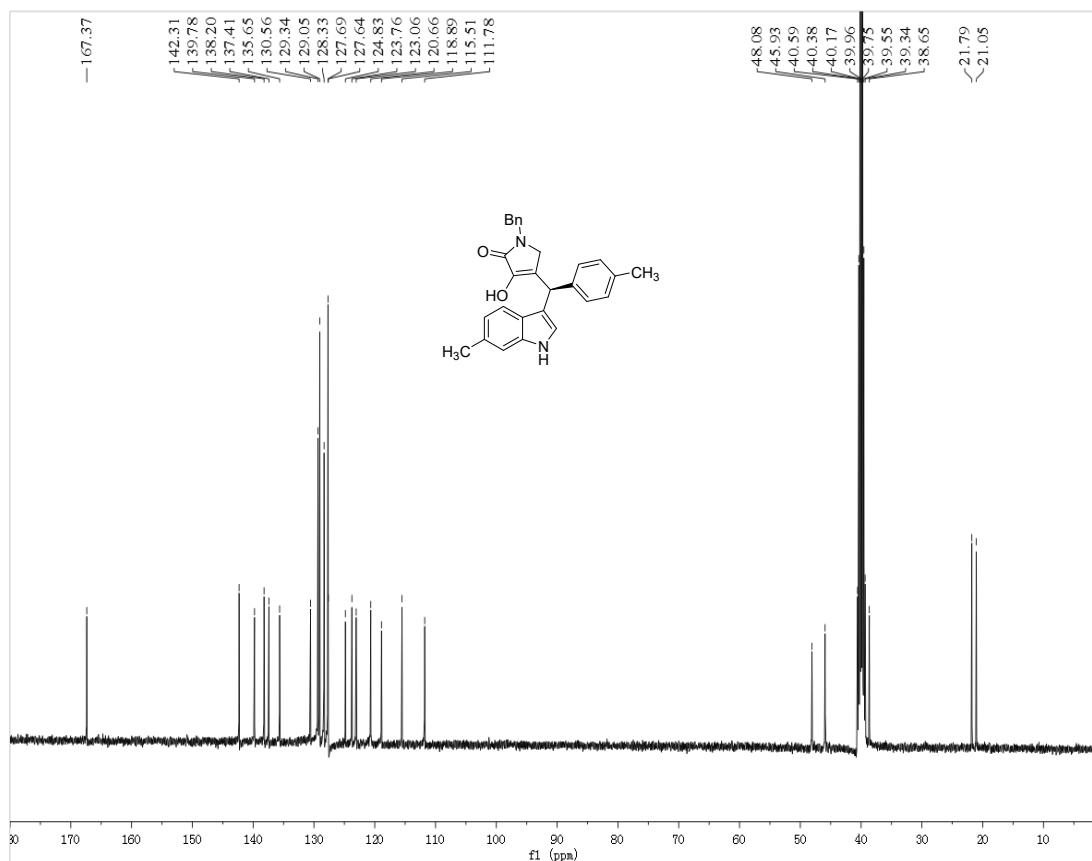

### HPLC of 6p

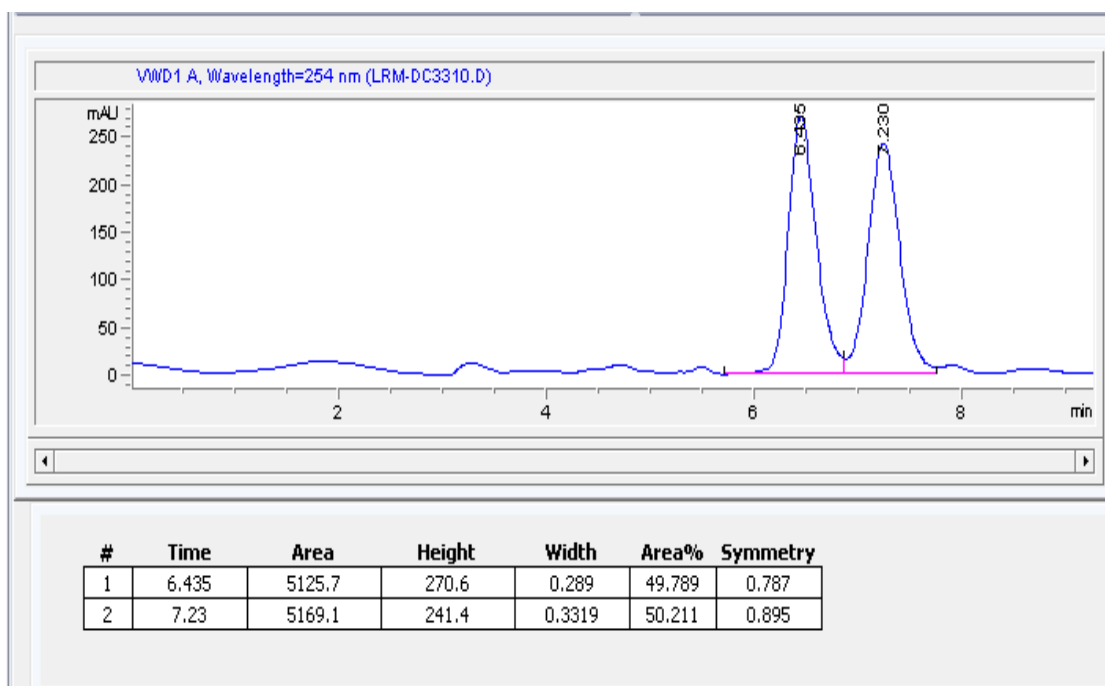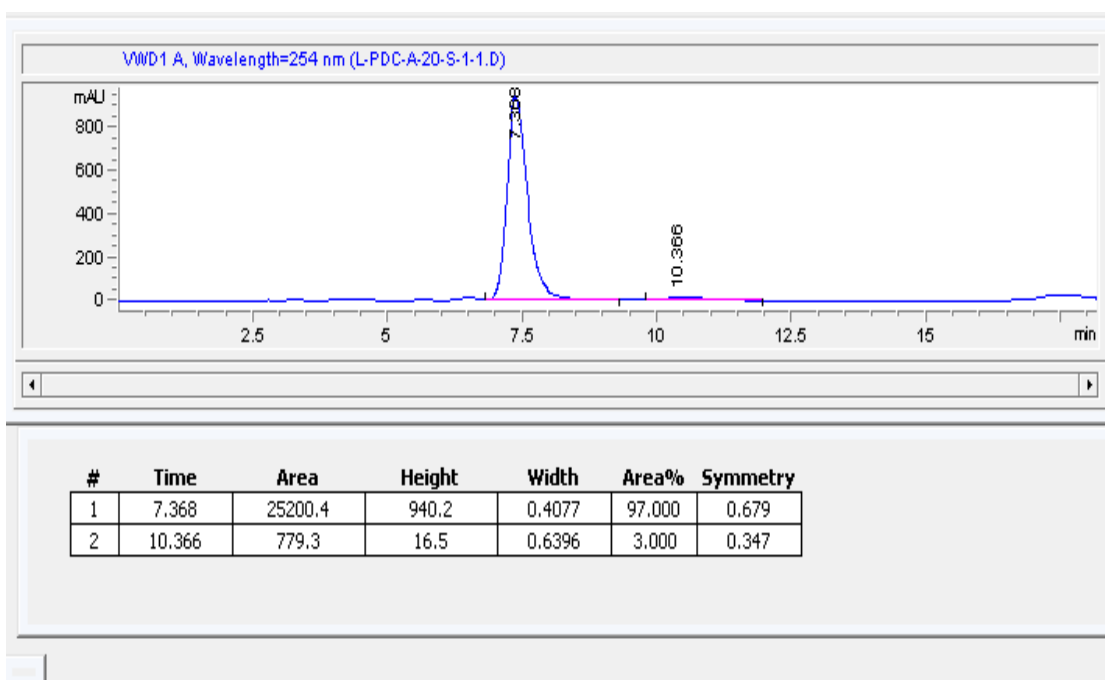

Supplement: d5nj00294j1.pdf [file d5nj00294j1.pdf]
